# Supplementary material for: Altered miRNA Signature of Developing Germ-cells in Infertile Patients Relates to the Severity of Spermatogenic Failure and Persists in Spermatozoa
Source: PubMed Central journal article supplement (PMC4673613; doi:10.1038/srep17991), 2015-12-09
Supplement: srep17991-s1.pdf [file srep17991-s1.pdf]

**ALTERED miRNA SIGNATURE OF DEVELOPING GERM-CELLS IN  
INFERTILE PATIENTS RELATES TO THE SEVERITY OF  
SPERMATOGENIC FAILURE AND PERSISTS IN SPERMATOZOA**

**Xavier Muñoz<sup>1#</sup>, Ana Mata<sup>2</sup>, Lluís Bassas<sup>2</sup>, Sara Larriba<sup>1\*</sup>**

## **ONLINE-ONLY MATERIAL**

In this section we have included supporting information concerning four tables.

**Supplemental Table S1.** Summary of miRNA expression data in scMF and in SCO phenotypes related to CS

Statistically increased miRNA expression levels are depicted in green (dark colour intensity is related to a fold-change increase >2 ); statistically decreased miRNA expression levels are depicted in red (dark colour intensity is related to a fold-change decrease <2), when compared with controls. Those miRNAs clustered in chr. 19 are depicted in italic.

Cp values >38 are depicted in bold.

\* p<0,05; \*\* p<0,005. Statistically significant p-values are depicted in bold.

| miRNA                   | Average<br><i>Cp</i> <sub>CS</sub> | Average<br><i>Cp</i> <sub>scMF</sub> | Average<br><i>Cp</i> <sub>SCO</sub> | miRNA expression |       |         | <i>p</i> -value |               | Sequence                |
|-------------------------|------------------------------------|--------------------------------------|-------------------------------------|------------------|-------|---------|-----------------|---------------|-------------------------|
|                         |                                    |                                      |                                     | CS               | scMF  | SCO     | scMF-CS         | SCO-CS        |                         |
| hsa-let-7a              | 28,10                              | 28,35                                | 26,55                               | 1                | 0,923 | 2,434*  | > 0,10          | <b>0,0060</b> | ugagguaguagguuugauaguu  |
| hsa-let-7a*             | 33,51                              | 33,30                                | 32,37                               | 1                | 1,268 | 1,829   | > 0,10          | 0,0592        |                         |
| hsa-let-7a-2*           | 35,89                              | 35,52                                | 35,42                               | 1                | 1,416 | 1,150   | > 0,10          | > 0,10        |                         |
| hsa-let-7b              | 25,85                              | 25,92                                | 24,32                               | 1                | 1,048 | 2,398** | > 0,10          | <b>0,0024</b> | ugagguaguagguugugugguu  |
| hsa-let-7b*             | 31,54                              | 31,35                                | 30,63                               | 1                | 1,251 | 1,566*  | > 0,10          | <b>0,0086</b> | cuauacaaccuacugccuucc   |
| hsa-let-7c              | 28,97                              | 29,16                                | 27,33                               | 1                | 0,964 | 2,583*  | > 0,10          | <b>0,0106</b> | ugagguaguagguuugauguu   |
| hsa-let-7d              | 31,01                              | 31,35                                | 29,63                               | 1                | 0,870 | 2,167*  | > 0,10          | <b>0,0411</b> | agagguaguagguugcauaguu  |
| hsa-let-7d*             | 25,40                              | 25,33                                | 25,30                               | 1                | 0,974 | 0,755   | > 0,10          | > 0,10        |                         |
| hsa-let-7e              | 28,95                              | 28,87                                | 27,71                               | 1                | 1,162 | 1,963*  | > 0,10          | <b>0,0097</b> | ugagguaggagguuugauaguu  |
| hsa-let-7f              | 29,29                              | 29,23                                | 27,99                               | 1                | 1,147 | 2,044   | > 0,10          | 0,0508        |                         |
| hsa-let-7f-1*           | 34,05                              | 34,09                                | 32,89                               | 1                | 1,073 | 1,869   | > 0,10          | <b>0,0270</b> | cuauacaaucauugccuucc    |
| hsa-let-7f-2*           | 32,56                              | 33,04                                | 31,64                               | 1                | 0,789 | 1,577   | > 0,10          | 0,0915        |                         |
| hsa-let-7g              | 27,85                              | 27,82                                | 26,45                               | 1                | 1,128 | 2,200*  | > 0,10          | <b>0,0024</b> | ugagguaguaguuuuguacaguu |
| hsa-let-7g*             | 33,55                              | 33,63                                | 31,99                               | 1                | 1,043 | 2,456*  | > 0,10          | <b>0,0183</b> | cuguacaggccacugccuugc   |
| hsa-let-7i              | 29,41                              | 29,51                                | 27,97                               | 1                | 1,027 | 2,274*  | > 0,10          | <b>0,0220</b> | ugagguaguaguuuugucuguu  |
| hsa-let-7i*             | 31,54                              | 31,33                                | 30,31                               | 1                | 1,272 | 1,950*  | > 0,10          | <b>0,0226</b> | cugcgcaagcuacugccuugcu  |
| hsa-miR-1               | 32,62                              | 31,62                                | 31,80                               | 1                | 2,199 | 1,470   | > 0,10          | 0,0842        |                         |
| hsa-miR-100             | 31,92                              | 31,75                                | 30,57                               | 1                | 1,238 | 2,131** | 0,1011          | <b>0,0157</b> | aaccguagauccgaacuug     |
| hsa-miR-101             | 28,11                              | 28,09                                | 27,16                               | 1                | 1,119 | 1,617   | > 0,10          | > 0,10        |                         |
| hsa-miR-101*            | 35,71                              | 35,78                                | 35,05                               | 1                | 1,055 | 1,319   | > 0,10          | > 0,10        |                         |
| hsa-miR-103             | 27,32                              | 27,31                                | 26,27                               | 1                | 1,105 | 1,720*  | > 0,10          | <b>0,0116</b> | agcagcauuguacaggcuauga  |
| hsa-miR-103 (duplicate) | 27,06                              | 27,06                                | 25,99                               | 1                | 1,102 | 1,760*  | > 0,10          | <b>0,0298</b> |                         |
| hsa-miR-103-2*          | 35,02                              | 35,26                                | 33,76                               | 1                | 0,919 | 1,972*  | > 0,10          | <b>0,0059</b> | agcuucuuuacagucugccuug  |
| hsa-miR-103-as          | 36,60                              | 36,99                                | 34,59                               | 1                | 1,067 | 3,371   | > 0,10          | > 0,10        |                         |

|                 |              |              |              |   |        |         |               |               |                         |
|-----------------|--------------|--------------|--------------|---|--------|---------|---------------|---------------|-------------------------|
| hsa-miR-105     | 35,69        | 36,19        | <b>40,00</b> | 1 | 0,781  | 0,042** | > 0,10        | <b>0,0022</b> | ucaaaugcucagacuccuguggu |
| hsa-miR-106a    | 28,34        | 28,51        | 27,68        | 1 | 0,980  | 1,324   | > 0,10        | > 0,10        |                         |
| hsa-miR-106b    | 33,94        | 34,26        | 33,67        | 1 | 0,885  | 1,007   | > 0,10        | > 0,10        |                         |
| hsa-miR-106b*   | 33,08        | 33,90        | 35,28        | 1 | 0,626  | 0,181*  | > 0,10        | <b>0,0123</b> | ccgcacugugguacuugcugc   |
| hsa-miR-107     | 28,09        | 28,08        | 27,01        | 1 | 1,112  | 1,757*  | > 0,10        | <b>0,0281</b> | agcagcauuguacagggcuauca |
| hsa-miR-10a     | 34,92        | 34,94        | 36,12        | 1 | 1,085  | 0,363   | > 0,10        | 0,0701        |                         |
| hsa-miR-10b     | 30,67        | 30,35        | 29,59        | 1 | 1,370  | 1,759   | > 0,10        | 0,0747        |                         |
| hsa-miR-10b*    | <b>39,63</b> | 37,66        | 36,65        | 1 | 4,340* | 6,610** | <b>0,0497</b> | <b>0,0002</b> | acagauucgauucuaggggaau  |
| hsa-miR-1185    | 35,10        | 35,34        | 33,95        | 1 | 0,930  | 1,841   | > 0,10        | 0,0692        |                         |
| hsa-miR-1201    | 31,79        | 32,11        | 31,82        | 1 | 0,883  | 0,816   | > 0,10        | > 0,10        |                         |
| hsa-miR-122     | 32,54        | 36,57        | <b>39,48</b> | 1 | 0,067* | 0,007*  | <b>0,0168</b> | <b>0,0233</b> | uggagugacaaugguguuug    |
| hsa-miR-124     | 32,08        | 33,42        | 34,92        | 1 | 0,433* | 0,120*  | <b>0,0454</b> | <b>0,0244</b> | uaaggcacgcgugaaugcc     |
| hsa-miR-1247    | 31,83        | 32,00        | 30,30        | 1 | 0,979  | 2,400   | > 0,10        | 0,0824        |                         |
| hsa-miR-1248    | 32,14        | 31,78        | 32,02        | 1 | 1,416  | 0,907   | > 0,10        | > 0,10        |                         |
| hsa-miR-125a-3p | 34,19        | 34,21        | 32,85        | 1 | 1,091  | 2,116*  | > 0,10        | <b>0,0319</b> | acaggugagguucuugggagcc  |
| hsa-miR-125a-5p | 26,44        | 26,33        | 25,24        | 1 | 1,185  | 1,920*  | > 0,10        | <b>0,0012</b> | ucccugagaccuuuaaccuguga |
| hsa-miR-125b    | 24,60        | 24,41        | 23,14        | 1 | 1,257  | 2,305*  | 0,0912        | <b>0,0009</b> | ucccugagaccuaacuuguga   |
| hsa-miR-125b-1* | 34,18        | 33,96        | 32,55        | 1 | 1,279  | 2,574*  | > 0,10        | <b>0,0076</b> | acggguuaggcucuugggagcu  |
| hsa-miR-125b-2* | 34,17        | 34,13        | 32,87        | 1 | 1,128  | 2,050*  | > 0,10        | <b>0,0195</b> | ucacaagucaggcucuugggac  |
| hsa-miR-126     | 27,32        | 27,36        | 26,97        | 1 | 1,068  | 1,057   | > 0,10        | > 0,10        |                         |
| hsa-miR-126*    | 30,84        | 30,97        | 30,51        | 1 | 1,012  | 1,048   | > 0,10        | > 0,10        |                         |
| hsa-miR-1260    | 27,89        | 28,27        | 28,34        | 1 | 0,844  | 0,611   | > 0,10        | > 0,10        |                         |
| hsa-miR-1270    | <b>40,00</b> | <b>39,72</b> | 36,85        | 1 | 1,330  | 7,405   | > 0,10        | 0,0892        | cuggagauauggaagagcugugu |
| hsa-miR-1271    | <b>40,00</b> | 37,74        | 35,43        | 1 | 5,288  | 17,602  | > 0,10        | > 0,10        | cuuggcaccuagcaagcacuca  |
| hsa-miR-127-3p  | 30,03        | 29,90        | 28,26        | 1 | 1,207  | 2,850   | > 0,10        | 0,0660        |                         |
| hsa-miR-127-5p  | 33,82        | 34,57        | 32,80        | 1 | 0,654  | 1,691   | > 0,10        | > 0,10        |                         |
| hsa-miR-129*    | <b>40,00</b> | <b>40,00</b> | 35,22        | 1 | 1,102  | 22,870  | > 0,10        | > 0,10        | aagcccuuaccccaaaaaguau  |
| hsa-miR-129-3p  | 32,24        | 31,76        | 30,56        | 1 | 1,539  | 2,681   | > 0,10        | > 0,10        |                         |
| hsa-miR-129-5p  | 32,46        | 32,71        | 30,46        | 1 | 0,928  | 3,342   | > 0,10        | > 0,10        |                         |
| hsa-miR-1296    | 31,85        | 31,90        | 32,29        | 1 | 1,063  | 0,613*  | > 0,10        | <b>0,0207</b> | uuagggccucgucuccaucucc  |
| hsa-miR-130a    | 31,33        | 31,18        | 30,24        | 1 | 1,221  | 1,768   | > 0,10        | 0,0962        |                         |
| hsa-miR-130b    | 36,72        | 36,49        | 36,27        | 1 | 1,292  | 1,144   | > 0,10        | > 0,10        |                         |
| hsa-miR-130b*   | 35,91        | 36,16        | 36,37        | 1 | 0,865  | 0,607   | > 0,10        | > 0,10        |                         |

|                 |              |       |              |   |        |         |        |               |                          |
|-----------------|--------------|-------|--------------|---|--------|---------|--------|---------------|--------------------------|
| hsa-miR-132     | 30,85        | 31,09 | 30,54        | 1 | 0,931  | 1,035   | > 0,10 | > 0,10        |                          |
| hsa-miR-132*    | 33,12        | 34,36 | 33,50        | 1 | 0,466  | 0,644   | 0,0779 | > 0,10        |                          |
| hsa-miR-133a    | 33,96        | 32,93 | 32,95        | 1 | 2,245  | 1,674   | > 0,10 | 0,0895        |                          |
| hsa-miR-133b    | 32,68        | 31,25 | 31,74        | 1 | 2,978  | 1,603   | > 0,10 | > 0,10        |                          |
| hsa-miR-134     | 33,16        | 32,54 | 31,48        | 1 | 1,694  | 2,663   | > 0,10 | 0,0786        |                          |
| hsa-miR-135a    | 30,07        | 29,99 | 28,50        | 1 | 1,164  | 2,470   | > 0,10 | 0,0851        |                          |
| hsa-miR-135a*   | 35,64        | 36,22 | 35,58        | 1 | 0,764  | 0,902   | > 0,10 | > 0,10        |                          |
| hsa-miR-135b    | 30,77        | 30,93 | 28,74        | 1 | 0,990  | 3,411*  | > 0,10 | <b>0,0255</b> | uauggcuuuucauuccuauguga  |
| hsa-miR-136     | 28,90        | 29,02 | 27,40        | 1 | 1,010  | 2,359   | > 0,10 | > 0,10        |                          |
| hsa-miR-138     | 34,74        | 34,97 | <b>40,00</b> | 1 | 0,942  | 0,022*  | > 0,10 | <b>0,0478</b> | agcugguguugugaaucaggccg  |
| hsa-miR-139-5p  | 31,88        | 32,37 | 31,32        | 1 | 0,785  | 1,229   | > 0,10 | > 0,10        |                          |
| hsa-miR-140-3p  | 30,24        | 30,08 | 28,96        | 1 | 1,224  | 2,023** | > 0,10 | <b>0,0017</b> | uaccacaggguaagaaccacgg   |
| hsa-miR-140-5p  | 31,70        | 31,75 | 30,69        | 1 | 1,104  | 1,748*  | > 0,10 | <b>0,0435</b> | cagugguuuuaccuuaugguag   |
| hsa-miR-141     | 35,73        | 36,67 | 35,77        | 1 | 0,615  | 0,834   | > 0,10 | > 0,10        |                          |
| hsa-miR-142-3p  | 29,81        | 29,55 | 28,72        | 1 | 1,319  | 1,777   | > 0,10 | > 0,10        |                          |
| hsa-miR-142-5p  | 34,87        | 34,40 | 33,70        | 1 | 1,529  | 1,876   | > 0,10 | > 0,10        |                          |
| hsa-miR-143     | 25,46        | 25,00 | 24,25        | 1 | 1,521  | 1,932*  | > 0,10 | <b>0,0362</b> | ugagaugaagcacuguagcuc    |
| hsa-miR-143*    | 31,28        | 30,89 | 30,43        | 1 | 1,450  | 1,509   | > 0,10 | 0,0803        |                          |
| hsa-miR-144     | 28,15        | 29,94 | 30,01        | 1 | 0,319  | 0,229*  | > 0,10 | <b>0,0210</b> | uacagauaagaugauguacu     |
| hsa-miR-144*    | 33,67        | 34,88 | 35,23        | 1 | 0,478  | 0,284   | > 0,10 | > 0,10        |                          |
| hsa-miR-145     | 24,82        | 24,42 | 23,69        | 1 | 1,456  | 1,826   | > 0,10 | 0,0842        |                          |
| hsa-miR-145*    | 32,17        | 32,07 | 31,15        | 1 | 1,179  | 1,696   | > 0,10 | 0,0667        |                          |
| hsa-miR-1468    | 36,03        | 36,34 | 34,75        | 1 | 0,895  | 2,025   | > 0,10 | > 0,10        |                          |
| hsa-miR-146a    | 35,79        | 35,24 | 33,41        | 1 | 1,618  | 4,335   | > 0,10 | 0,0766        |                          |
| hsa-miR-146b-3p | 35,37        | 36,30 | 35,42        | 1 | 0,578  | 0,807   | > 0,10 | > 0,10        |                          |
| hsa-miR-146b-5p | 34,29        | 34,38 | 33,19        | 1 | 1,036  | 1,784*  | > 0,10 | <b>0,0355</b> | ugagaacugaauuccauaggcu   |
| hsa-miR-147b    | 34,24        | 34,92 | 35,80        | 1 | 0,681  | 0,256   | > 0,10 | <b>0,0009</b> | gugugcggaaaugcuucugcua   |
| hsa-miR-148a    | 30,04        | 29,83 | 28,53        | 1 | 1,277  | 2,373*  | > 0,10 | <b>0,0158</b> | ucagugcacuacagaacuuugu   |
| hsa-miR-148a*   | <b>40,00</b> | 36,28 | 36,45        | 1 | 15,548 | 9,769*  | > 0,10 | <b>0,0396</b> | aaaguucugagacacuccgacu   |
| hsa-miR-148b    | 31,05        | 31,15 | 30,03        | 1 | 1,024  | 1,688   | > 0,10 | 0,0538        |                          |
| hsa-miR-149     | 31,41        | 31,02 | 29,99        | 1 | 1,442  | 2,230*  | > 0,10 | <b>0,0312</b> | ucuggcuccgugucuucacucucc |
| hsa-miR-149*    | 33,95        | 34,25 | 34,22        | 1 | 0,901  | 0,692*  | > 0,10 | <b>0,0330</b> | agggaggacgggggcugugc     |
| hsa-miR-150     | 31,08        | 30,76 | 30,57        | 1 | 1,373  | 1,188   | > 0,10 | > 0,10        |                          |

|                 |       |              |              |   |        |         |               |               |                          |
|-----------------|-------|--------------|--------------|---|--------|---------|---------------|---------------|--------------------------|
| hsa-miR-151-3p  | 31,68 | 31,74        | 30,23        | 1 | 1,060  | 2,284*  | > 0,10        | <b>0,0117</b> | cuagacugaagcuccuugagg    |
| hsa-miR-151-5p  | 29,17 | 29,20        | 27,84        | 1 | 1,079  | 2,101*  | > 0,10        | <b>0,0427</b> | ucgaggagcucacagucuagu    |
| hsa-miR-152     | 29,98 | 30,36        | 29,48        | 1 | 0,850  | 1,185   | > 0,10        | > 0,10        |                          |
| hsa-miR-153     | 31,05 | 31,95        | 31,84        | 1 | 0,587  | 0,481   | > 0,10        | > 0,10        |                          |
| hsa-miR-1537    | 36,68 | <b>40,00</b> | 36,38        | 1 | 0,110  | 1,027   | > 0,10        | > 0,10        | aaaaccgucuaguacaguugu    |
| hsa-miR-154     | 31,78 | 31,57        | 29,86        | 1 | 1,278  | 3,155   | > 0,10        | 0,0528        |                          |
| hsa-miR-154*    | 35,96 | 36,10        | 35,04        | 1 | 0,999  | 1,586   | > 0,10        | > 0,10        |                          |
| hsa-miR-155     | 34,17 | 34,59        | 33,69        | 1 | 0,821  | 1,159   | > 0,10        | > 0,10        |                          |
| hsa-miR-15a     | 27,49 | 27,72        | 26,91        | 1 | 0,936  | 1,248   | > 0,10        | > 0,10        |                          |
| hsa-miR-15a*    | 35,30 | 36,11        | 34,96        | 1 | 0,579  | 1,074   | > 0,10        | > 0,10        |                          |
| hsa-miR-15b     | 28,01 | 28,70        | 28,37        | 1 | 0,682  | 0,649*  | 0,0986        | <b>0,0235</b> | uagcagcacaucaugguuaca    |
| hsa-miR-15b*    | 34,50 | 34,37        | 34,13        | 1 | 1,186  | 1,057   | > 0,10        | > 0,10        |                          |
| hsa-miR-16      | 26,50 | 26,80        | 26,73        | 1 | 0,893  | 0,714   | > 0,10        | > 0,10        |                          |
| hsa-miR-16-2*   | 32,50 | 33,34        | 33,75        | 1 | 0,614* | 0,350*  | <b>0,0285</b> | <b>0,0054</b> | ccaauuuacugucgcuuuu      |
| hsa-miR-17      | 31,87 | 32,41        | 31,14        | 1 | 0,757  | 1,387   | > 0,10        | > 0,10        |                          |
| hsa-miR-17*     | 30,98 | 30,98        | 29,61        | 1 | 1,108  | 2,159*  | > 0,10        | <b>0,0313</b> | acugcagugaaggcacuuguag   |
| hsa-miR-181a    | 28,81 | 28,73        | 27,49        | 1 | 1,160  | 2,082** | > 0,10        | <b>0,0123</b> | aacauucaacgcugcggugagu   |
| hsa-miR-181a*   | 35,74 | 35,20        | 34,01        | 1 | 1,600  | 2,766   | > 0,10        | 0,0719        |                          |
| hsa-miR-181a-2* | 35,88 | 36,00        | 34,41        | 1 | 0,940  | 2,303   | > 0,10        | > 0,10        |                          |
| hsa-miR-181b    | 32,99 | 32,87        | 30,98        | 1 | 1,204  | 3,366*  | > 0,10        | <b>0,0029</b> | aacaucauugcugcggugggu    |
| hsa-miR-181c    | 35,01 | 34,10        | 34,26        | 1 | 2,066  | 1,399   | 0,0879        | > 0,10        |                          |
| hsa-miR-181c*   | 35,99 | 35,52        | 36,72        | 1 | 1,525  | 0,505   | > 0,10        | > 0,10        |                          |
| hsa-miR-181d    | 35,81 | 35,63        | 34,52        | 1 | 1,244  | 2,030   | > 0,10        | > 0,10        |                          |
| hsa-miR-182     | 34,40 | 37,20        | <b>40,00</b> | 1 | 0,157* | 0,017*  | <b>0,0292</b> | <b>0,0304</b> | uuuggcauugguagaacucacacu |
| hsa-miR-182*    | 33,74 | 35,35        | 36,55        | 1 | 0,356  | 0,103   | > 0,10        | > 0,10        |                          |
| hsa-miR-185     | 32,20 | 32,67        | 32,20        | 1 | 0,798  | 0,838   | > 0,10        | > 0,10        |                          |
| hsa-miR-186     | 30,61 | 30,53        | 29,04        | 1 | 1,165  | 2,471** | > 0,10        | <b>0,0072</b> | caaagaauucuccuuuugggu    |
| hsa-miR-187     | 30,72 | 30,71        | 28,91        | 1 | 1,106  | 2,997   | > 0,10        | 0,0831        |                          |
| hsa-miR-187*    | 35,80 | 36,04        | 35,40        | 1 | 1,036  | 1,139   | > 0,10        | > 0,10        |                          |
| hsa-miR-188-5p  | 34,92 | 34,80        | 34,18        | 1 | 1,194  | 1,392*  | > 0,10        | <b>0,0372</b> | caucccuugcaugguggagg     |
| hsa-miR-18a     | 33,43 | 33,77        | 34,22        | 1 | 0,858  | 0,477   | > 0,10        | > 0,10        |                          |
| hsa-miR-18a*    | 33,44 | 33,57        | 33,36        | 1 | 1,003  | 0,877   | > 0,10        | > 0,10        |                          |
| hsa-miR-18b     | 32,21 | 32,66        | 32,61        | 1 | 0,805  | 0,632   | > 0,10        | > 0,10        |                          |

|                         |       |       |       |   |        |         |        |        |                         |
|-------------------------|-------|-------|-------|---|--------|---------|--------|--------|-------------------------|
| hsa-miR-190             | 32,83 | 33,27 | 32,08 | 1 | 0,810  | 1,402** | > 0,10 | 0,0079 | ugauauguuugauauuuaggu   |
| hsa-miR-1908            | 36,22 | 36,77 | 34,46 | 1 | 0,807  | 2,820   | > 0,10 | > 0,10 |                         |
| hsa-miR-191             | 30,13 | 30,50 | 29,55 | 1 | 0,852  | 1,245   | > 0,10 | 0,1030 |                         |
| hsa-miR-191 (duplicate) | 30,26 | 30,49 | 29,60 | 1 | 0,943  | 1,318   | > 0,10 | 0,1030 |                         |
| hsa-miR-191*            | 33,98 | 33,42 | 35,55 | 1 | 1,631  | 0,281   | > 0,10 | 0,0867 |                         |
| hsa-miR-1911*           | 40,00 | 40,00 | 38,05 | 1 | 1,102  | 3,224   | > 0,10 | > 0,10 | caccaggcauuguggucucc    |
| hsa-miR-192             | 32,56 | 32,56 | 33,51 | 1 | 1,100  | 0,429   | > 0,10 | > 0,10 |                         |
| hsa-miR-193a-3p         | 34,57 | 34,49 | 33,35 | 1 | 1,164  | 1,936   | > 0,10 | > 0,10 |                         |
| hsa-miR-193a-5p         | 35,95 | 36,00 | 35,19 | 1 | 1,069  | 1,418   | > 0,10 | 0,0767 |                         |
| hsa-miR-193b            | 29,12 | 29,07 | 27,52 | 1 | 1,143  | 2,536*  | > 0,10 | 0,0071 | aacuggcccucaaagucccgcu  |
| hsa-miR-193b*           | 33,91 | 34,02 | 32,36 | 1 | 1,058  | 2,536   | > 0,10 | > 0,10 |                         |
| hsa-miR-194             | 34,27 | 35,12 | 35,22 | 1 | 0,611  | 0,432   | > 0,10 | > 0,10 |                         |
| hsa-miR-195             | 27,13 | 27,23 | 26,05 | 1 | 1,027  | 1,759   | > 0,10 | 0,0714 |                         |
| hsa-miR-195*            | 34,89 | 34,88 | 34,01 | 1 | 1,186  | 1,532   | > 0,10 | 0,1011 |                         |
| hsa-miR-196a            | 36,04 | 33,61 | 35,35 | 1 | 6,247  | 1,415   | > 0,10 | > 0,10 |                         |
| hsa-miR-196b            | 37,72 | 35,33 | 36,87 | 1 | 5,361  | 1,376   | > 0,10 | > 0,10 |                         |
| hsa-miR-197             | 30,48 | 30,44 | 29,30 | 1 | 1,130  | 1,888** | > 0,10 | 0,0037 | uucaccaccuuccaccaccagc  |
| hsa-miR-1974            | 21,67 | 21,91 | 21,41 | 1 | 0,927  | 0,995   | > 0,10 | > 0,10 |                         |
| hsa-miR-199a-3p         | 28,61 | 28,61 | 26,91 | 1 | 1,107  | 2,722   | > 0,10 | 0,0824 |                         |
| hsa-miR-199a-5p         | 27,18 | 26,91 | 25,70 | 1 | 1,326  | 2,325   | > 0,10 | 0,0594 |                         |
| hsa-miR-199b-5p         | 31,73 | 31,90 | 30,52 | 1 | 0,983  | 1,938   | > 0,10 | > 0,10 |                         |
| hsa-miR-19a             | 31,43 | 31,57 | 30,72 | 1 | 1,002  | 1,360   | > 0,10 | > 0,10 |                         |
| hsa-miR-19b             | 26,34 | 26,48 | 25,60 | 1 | 1,000  | 1,399   | > 0,10 | 0,0550 |                         |
| hsa-miR-19b-1*          | 34,53 | 35,01 | 34,42 | 1 | 0,782  | 0,887   | > 0,10 | > 0,10 |                         |
| hsa-miR-200a            | 35,24 | 35,76 | 35,85 | 1 | 0,770  | 0,546   | > 0,10 | > 0,10 |                         |
| hsa-miR-200b            | 36,28 | 36,63 | 36,37 | 1 | 0,841  | 0,809   | > 0,10 | > 0,10 |                         |
| hsa-miR-202             | 27,25 | 27,02 | 25,55 | 1 | 1,344  | 2,819*  | > 0,10 | 0,0438 | agagguaauagggaugggaa    |
| hsa-miR-202*            | 27,70 | 26,79 | 25,94 | 1 | 2,069* | 2,838*  | 0,0090 | 0,0063 | uuccuauugcauauacuucuuug |
| hsa-miR-204             | 27,49 | 27,32 | 26,04 | 1 | 1,241  | 2,285*  | > 0,10 | 0,0308 | uucccuuugcauccuauugccu  |
| hsa-miR-205             | 35,52 | 35,45 | 40,00 | 1 | 1,286  | 0,039*  | > 0,10 | > 0,10 | uccuucuuuccaccggagucug  |
| hsa-miR-20a             | 27,33 | 27,52 | 26,96 | 1 | 0,966  | 1,071   | > 0,10 | > 0,10 |                         |
| hsa-miR-20a*            | 33,15 | 32,92 | 32,00 | 1 | 1,296  | 1,849*  | > 0,10 | 0,0313 | acugcauuauagagcacuuuaag |
| hsa-miR-20b             | 36,03 | 35,76 | 40,00 | 1 | 1,426  | 0,053   | > 0,10 | 0,0501 | caaagugcucauagucagguag  |

|                |              |              |              |   |         |        |               |               |                         |
|----------------|--------------|--------------|--------------|---|---------|--------|---------------|---------------|-------------------------|
| hsa-miR-21     | 27,32        | 27,18        | 26,11        | 1 | 1,220   | 1,930* | > 0,10        | <b>0,0122</b> | uagcuuauacagacugauguuga |
| hsa-miR-21*    | 35,07        | 34,80        | 33,19        | 1 | 1,325   | 3,072* | > 0,10        | <b>0,0393</b> | caacaccagucgaugggcugu   |
| hsa-miR-210    | 31,77        | 31,37        | 30,57        | 1 | 1,446*  | 1,903* | <b>0,0263</b> | <b>0,0270</b> | cugugcgugugacagcggcuga  |
| hsa-miR-212    | 34,12        | 35,35        | 33,94        | 1 | 0,505   | 0,950  | 0,0535        | > 0,10        |                         |
| hsa-miR-214    | 30,61        | 30,47        | 28,99        | 1 | 1,213   | 2,555* | > 0,10        | <b>0,0324</b> | acagcaggcacagacaggcagu  |
| hsa-miR-214*   | 31,88        | 31,74        | 30,32        | 1 | 1,211   | 2,457  | > 0,10        | 0,0993        |                         |
| hsa-miR-215    | 33,84        | 34,24        | 34,71        | 1 | 0,834   | 0,458* | > 0,10        | <b>0,0292</b> | augaccuugaauugacagac    |
| hsa-miR-216a   | 35,25        | 35,99        | <b>40,00</b> | 1 | 0,687   | 0,032  | > 0,10        | 0,1055        | uaaucucagcuggcaacuguga  |
| hsa-miR-218    | 33,41        | 33,29        | 32,53        | 1 | 1,279   | 1,533  | > 0,10        | > 0,10        |                         |
| hsa-miR-219-5p | 33,14        | 34,29        | 32,17        | 1 | 0,497** | 1,632  | <b>0,0067</b> | 0,0718        | ugauuguccaaacgcauuucu   |
| hsa-miR-22     | 29,87        | 29,81        | 28,26        | 1 | 1,143   | 2,549* | > 0,10        | <b>0,0096</b> | aagcugccaguugaagaacugu  |
| hsa-miR-22*    | 30,33        | 30,53        | 29,14        | 1 | 0,960   | 1,909* | > 0,10        | <b>0,0349</b> | aguucuucaguggcaagcuua   |
| hsa-miR-221    | 32,57        | 32,18        | 31,34        | 1 | 1,446   | 1,960  | > 0,10        | 0,0987        |                         |
| hsa-miR-222    | 31,32        | 31,15        | 30,86        | 1 | 1,236   | 1,142  | > 0,10        | > 0,10        |                         |
| hsa-miR-223    | 30,51        | 30,16        | 29,15        | 1 | 1,404   | 2,147  | > 0,10        | 0,0988        |                         |
| hsa-miR-23a    | 27,98        | 27,90        | 26,76        | 1 | 1,164   | 1,940* | > 0,10        | <b>0,0283</b> | aucacauugccagggauuucc   |
| hsa-miR-23a*   | 35,25        | <b>40,00</b> | <b>40,00</b> | 1 | 0,039   | 0,030  | > 0,10        | > 0,10        | gggguuccuggggaugggauuu  |
| hsa-miR-23b    | 27,47        | 27,37        | 26,47        | 1 | 1,185   | 1,673  | > 0,10        | 0,0916        |                         |
| hsa-miR-24     | 26,81        | 26,63        | 25,68        | 1 | 1,249   | 1,830* | > 0,10        | <b>0,0270</b> | uggcucaguucagcaggaacag  |
| hsa-miR-24-1*  | 34,11        | 34,06        | 33,42        | 1 | 1,138   | 1,231  | > 0,10        | > 0,10        |                         |
| hsa-miR-24-2*  | 34,12        | 33,88        | 33,35        | 1 | 1,399   | 1,426  | > 0,10        | > 0,10        |                         |
| hsa-miR-25     | 31,47        | 31,93        | 31,40        | 1 | 0,803   | 0,873  | > 0,10        | > 0,10        |                         |
| hsa-miR-26a    | 26,33        | 26,00        | 25,07        | 1 | 1,386   | 1,993* | 0,0649        | <b>0,0033</b> | uucaagaauccaggauaggcu   |
| hsa-miR-26a-1* | 34,39        | 35,01        | 34,57        | 1 | 0,668   | 0,736  | > 0,10        | > 0,10        |                         |
| hsa-miR-26a-2* | <b>40,00</b> | <b>38,61</b> | 37,77        | 1 | 2,885   | 3,917  | 0,0568        | 0,0795        | ccuauucuugauuacuuguuuc  |
| hsa-miR-26b    | 30,00        | 30,18        | 29,05        | 1 | 0,973   | 1,614  | > 0,10        | > 0,10        |                         |
| hsa-miR-26b*   | 35,29        | 36,37        | 34,64        | 1 | 0,551   | 1,295  | > 0,10        | > 0,10        |                         |
| hsa-miR-27a    | 27,53        | 27,45        | 26,41        | 1 | 1,172   | 1,823* | > 0,10        | <b>0,0357</b> | uucacaguggcuaaguuccgc   |
| hsa-miR-27b    | 27,55        | 27,47        | 26,52        | 1 | 1,162   | 1,691  | > 0,10        | 0,0586        |                         |
| hsa-miR-27b*   | 36,81        | 34,79        | 35,35        | 1 | 3,893   | 2,285* | > 0,10        | <b>0,0498</b> | agagcuuagcugauuggugaac  |
| hsa-miR-28-3p  | 32,23        | 32,35        | 31,22        | 1 | 1,017   | 1,682* | > 0,10        | <b>0,0219</b> | cacuagauugagcuccugga    |
| hsa-miR-28-5p  | 31,43        | 31,53        | 30,47        | 1 | 1,026   | 1,620* | > 0,10        | <b>0,0436</b> | aaggagcucacagucuauugag  |
| hsa-miR-296-3p | 33,14        | 34,78        | 34,89        | 1 | 0,353   | 0,248* | 0,0821        | <b>0,0387</b> | gaggguuggguggaggcucc    |



|                |              |       |              |   |       |         |        |               |                        |
|----------------|--------------|-------|--------------|---|-------|---------|--------|---------------|------------------------|
| hsa-miR-296-5p | 31,70        | 32,27 | 32,49        | 1 | 0,743 | 0,483*  | 0,0778 | <b>0,0029</b> | aggcccccccauccugu      |
| hsa-miR-299-3p | 36,53        | 36,34 | 34,53        | 1 | 1,248 | 3,295   | > 0,10 | > 0,10        |                        |
| hsa-miR-299-5p | 32,72        | 32,22 | 30,87        | 1 | 1,560 | 3,019*  | > 0,10 | <b>0,0436</b> | ugguuuaccguccacauacau  |
| hsa-miR-29a    | 28,14        | 28,22 | 26,89        | 1 | 1,043 | 1,985*  | > 0,10 | <b>0,0268</b> | uagcaccaucugaaucgguaa  |
| hsa-miR-29a*   | 32,33        | 32,53 | 31,13        | 1 | 0,958 | 1,910*  | > 0,10 | <b>0,0198</b> | acugauuuuuugguguucag   |
| hsa-miR-29b    | 28,91        | 28,78 | 27,82        | 1 | 1,206 | 1,768*  | > 0,10 | <b>0,0445</b> | uagcaccuuugaaucaguguu  |
| hsa-miR-29b-1* | 33,46        | 33,55 | 32,69        | 1 | 1,034 | 1,417   | > 0,10 | > 0,10        |                        |
| hsa-miR-29b-2* | 32,54        | 32,85 | 31,45        | 1 | 0,886 | 1,769   | > 0,10 | 0,0986        |                        |
| hsa-miR-29c    | 27,43        | 27,36 | 26,18        | 1 | 1,156 | 1,983*  | > 0,10 | <b>0,0244</b> | uagcaccuuugaaucgguaa   |
| hsa-miR-29c*   | 32,89        | 32,88 | 31,43        | 1 | 1,111 | 2,296** | > 0,10 | <b>0,0002</b> | ugaccgauuuccugguguuc   |
| hsa-miR-301a   | 32,52        | 33,03 | 32,29        | 1 | 0,774 | 0,978   | 0,0991 | > 0,10        |                        |
| hsa-miR-30a*   | 31,95        | 32,84 | 32,46        | 1 | 0,597 | 0,587*  | > 0,10 | <b>0,0344</b> | cuuucagucggauguuugcagc |
| hsa-miR-30b    | 28,23        | 28,21 | 27,37        | 1 | 1,111 | 1,515   | > 0,10 | 0,1225        |                        |
| hsa-miR-30c    | 27,51        | 27,58 | 26,86        | 1 | 1,048 | 1,306*  | > 0,10 | <b>0,0229</b> | uguaaacauccuacacucagc  |
| hsa-miR-30d    | 31,62        | 31,60 | 30,67        | 1 | 1,118 | 1,612   | > 0,10 | 0,0532        |                        |
| hsa-miR-30d*   | 33,47        | 34,12 | 34,12        | 1 | 0,700 | 0,531   | > 0,10 | > 0,10        |                        |
| hsa-miR-30e    | 32,56        | 32,42 | 31,92        | 1 | 1,212 | 1,293   | > 0,10 | > 0,10        |                        |
| hsa-miR-30e*   | 31,06        | 31,58 | 31,19        | 1 | 0,766 | 0,762   | > 0,10 | > 0,10        |                        |
| hsa-miR-31     | 30,50        | 31,05 | <b>40,00</b> | 1 | 0,756 | 0,001*  | > 0,10 | <b>0,0100</b> | aggcaagaucuggcauagcu   |
| hsa-miR-31*    | 33,79        | 34,54 | 36,70        | 1 | 0,655 | 0,101   | > 0,10 | <b>0,0480</b> | ugcuauugccaauuugccau   |
| hsa-miR-32     | 29,81        | 29,90 | 28,96        | 1 | 1,031 | 1,495   | > 0,10 | 0,1064        |                        |
| hsa-miR-320a   | 28,04        | 27,99 | 26,72        | 1 | 1,146 | 2,085** | > 0,10 | <b>0,0007</b> | aaaagcuggguugagaggcgga |
| hsa-miR-320b   | 28,73        | 28,45 | 27,25        | 1 | 1,333 | 2,322** | 0,0784 | <b>0,0030</b> | aaaagcuggguugagaggcga  |
| hsa-miR-323-3p | 36,72        | 35,91 | 34,26        | 1 | 1,934 | 4,581   | > 0,10 | > 0,10        |                        |
| hsa-miR-324-3p | 31,14        | 31,14 | 29,94        | 1 | 1,106 | 1,913*  | > 0,10 | <b>0,0034</b> | acugcccaggugcugcugg    |
| hsa-miR-324-5p | 31,81        | 31,73 | 30,69        | 1 | 1,167 | 1,816*  | > 0,10 | <b>0,0105</b> | cgcaucccuagggaauuggugu |
| hsa-miR-326    | 33,22        | 33,44 | 32,55        | 1 | 0,951 | 1,326   | > 0,10 | > 0,10        |                        |
| hsa-miR-328    | 31,80        | 31,68 | 30,57        | 1 | 1,198 | 1,967** | > 0,10 | <b>0,0015</b> | cuggccucucgcccuccgu    |
| hsa-miR-329    | 35,79        | 34,64 | 33,34        | 1 | 2,442 | 4,552*  | > 0,10 | <b>0,0100</b> | aacacaccugguuuaccucuuu |
| hsa-miR-330-5p | <b>40,00</b> | 37,40 | 36,27        | 1 | 6,684 | 10,122  | > 0,10 | > 0,10        | ucucugggcuugucuuaggc   |
| hsa-miR-331-3p | 30,03        | 29,94 | 28,75        | 1 | 1,172 | 2,025   | > 0,10 | 0,0590        |                        |
| hsa-miR-335    | 32,11        | 32,14 | 31,52        | 1 | 1,083 | 1,260   | > 0,10 | > 0,10        |                        |
| hsa-miR-337-3p | 35,44        | 35,57 | 34,30        | 1 | 1,009 | 1,837   | > 0,10 | 0,0504        |                        |

|                |              |              |              |   |        |         |               |               |                          |
|----------------|--------------|--------------|--------------|---|--------|---------|---------------|---------------|--------------------------|
| hsa-miR-337-5p | 36,98        | 36,30        | 34,88        | 1 | 1,772  | 3,579   | > 0,10        | 0,1079        |                          |
| hsa-miR-338-3p | 30,73        | 31,27        | 30,06        | 1 | 0,755  | 1,321   | > 0,10        | > 0,10        |                          |
| hsa-miR-339-3p | 33,14        | 32,86        | 31,51        | 1 | 1,343  | 2,578** | > 0,10        | <b>0,0078</b> | ucccuguccuccaggagcucacg  |
| hsa-miR-339-5p | 31,88        | 31,51        | 30,38        | 1 | 1,424  | 2,356   | 0,0748        | 0,0517        |                          |
| hsa-miR-33a    | 30,04        | 30,02        | 28,26        | 1 | 1,113  | 2,853   | > 0,10        | 0,0785        |                          |
| hsa-miR-33a*   | <b>39,02</b> | 35,93        | 34,50        | 1 | 9,356  | 19,140  | > 0,10        | > 0,10        | caauguuccacagucaucac     |
| hsa-miR-33b    | 32,54        | 32,70        | 30,98        | 1 | 0,923  | 2,467*  | > 0,10        | <b>0,0092</b> | gugcauugcuguugcauugc     |
| hsa-miR-340    | 36,42        | 36,41        | 36,43        | 1 | 1,110  | 0,829   | > 0,10        | > 0,10        |                          |
| hsa-miR-340*   | 35,47        | 36,42        | 36,58        | 1 | 0,824  | 0,381   | > 0,10        | > 0,10        |                          |
| hsa-miR-342-3p | 30,60        | 30,23        | 29,89        | 1 | 1,422  | 1,370   | 0,0916        | 0,0554        |                          |
| hsa-miR-34a    | 27,58        | 27,72        | 26,34        | 1 | 0,998  | 1,962*  | > 0,10        | <b>0,0187</b> | uggcagugucuuaagcugguugu  |
| hsa-miR-34a*   | 31,97        | 31,90        | 30,77        | 1 | 1,159  | 1,920   | > 0,10        | 0,0655        |                          |
| hsa-miR-34b    | 30,46        | 32,64        | <b>38,70</b> | 1 | 0,243* | 0,002*  | <b>0,0178</b> | <b>0,0147</b> | caaucacuaaccucacugccau   |
| hsa-miR-34b*   | 27,42        | 29,75        | 33,84        | 1 | 0,219* | 0,010*  | <b>0,0414</b> | <b>0,0124</b> | uaggcagugucauuagcugauug  |
| hsa-miR-34c-5p | 27,21        | 29,25        | 34,16        | 1 | 0,268  | 0,007*  | 0,0528        | <b>0,0199</b> | aggcaguguaguuaagcugauugc |
| hsa-miR-361-3p | 32,23        | 32,16        | 30,99        | 1 | 1,164  | 1,977   | > 0,10        | 0,0813        |                          |
| hsa-miR-362-3p | 36,25        | 36,57        | 35,33        | 1 | 0,883  | 1,578   | > 0,10        | > 0,10        |                          |
| hsa-miR-362-5p | 37,11        | 36,99        | 35,54        | 1 | 1,477  | 2,475   | > 0,10        | 0,0904        |                          |
| hsa-miR-363    | 35,62        | 35,99        | 36,14        | 1 | 0,852  | 0,516   | > 0,10        | > 0,10        |                          |
| hsa-miR-365    | 29,88        | 29,94        | 28,51        | 1 | 1,054  | 2,156*  | > 0,10        | <b>0,0101</b> | uaaugcccaaaaauccuuau     |
| hsa-miR-369-5p | 34,65        | 34,33        | 33,62        | 1 | 1,372  | 1,704   | > 0,10        | > 0,10        |                          |
| hsa-miR-370    | 32,86        | 33,21        | 31,45        | 1 | 0,865  | 2,224   | > 0,10        | 0,0976        |                          |
| hsa-miR-371-3p | 36,46        | 37,34        | <b>40,00</b> | 1 | 0,600  | 0,072   | > 0,10        | > 0,10        | aagugccccaucuuuugagugc   |
| hsa-miR-372    | 33,38        | 35,11        | 36,61        | 1 | 0,332  | 0,079   | > 0,10        | > 0,10        |                          |
| hsa-miR-373    | 35,25        | 35,98        | <b>40,00</b> | 1 | 0,712  | 0,031   | > 0,10        | 0,0522        | gaagugcuucgauuuuggggugu  |
| hsa-miR-373*   | 34,59        | 36,24        | 35,78        | 1 | 0,376  | 0,333   | > 0,10        | > 0,10        |                          |
| hsa-miR-374a   | 33,08        | 33,08        | 31,80        | 1 | 1,100  | 2,022** | > 0,10        | <b>0,0076</b> | uuauaaacaaccuguaagug     |
| hsa-miR-374b   | 31,69        | 31,32        | 30,56        | 1 | 1,426  | 1,833*  | > 0,10        | <b>0,0246</b> | auauaaacaaccugcuaagug    |
| hsa-miR-374b*  | <b>40,00</b> | <b>40,00</b> | 37,17        | 1 | 1,102  | 5,936** | > 0,10        | <b>0,0138</b> | cuuagcagguuguauuucauu    |
| hsa-miR-375    | 32,75        | 34,70        | <b>40,00</b> | 1 | 0,285  | 0,005** | > 0,10        | <b>0,0214</b> | uuuguucguucggcucgcguga   |
| hsa-miR-376a   | 31,12        | 31,24        | 29,82        | 1 | 1,013  | 2,060   | > 0,10        | 0,0932        |                          |
| hsa-miR-376b   | 33,75        | 33,83        | 31,74        | 1 | 1,040  | 3,360   | > 0,10        | 0,0527        |                          |
| hsa-miR-376c   | 31,34        | 31,40        | 29,61        | 1 | 1,053  | 2,764   | > 0,10        | > 0,10        |                          |

|                            |       |              |              |   |       |         |               |               |                         |
|----------------------------|-------|--------------|--------------|---|-------|---------|---------------|---------------|-------------------------|
| hsa-miR-377                | 31,84 | 31,83        | 30,19        | 1 | 1,109 | 2,615   | > 0,10        | 0,0950        |                         |
| hsa-miR-378                | 32,45 | 32,89        | 32,36        | 1 | 0,812 | 0,892   | > 0,10        | > 0,10        |                         |
| hsa-miR-379                | 35,08 | 35,16        | 33,38        | 1 | 1,039 | 2,707   | > 0,10        | > 0,10        |                         |
| hsa-miR-381                | 35,30 | 35,06        | 33,19        | 1 | 1,303 | 3,593*  | > 0,10        | <b>0,0437</b> | uauacaagggaagcucucugu   |
| hsa-miR-382                | 33,15 | 33,18        | 31,43        | 1 | 1,081 | 2,742   | > 0,10        | > 0,10        |                         |
| hsa-miR-383                | 37,26 | 36,76        | 36,34        | 1 | 1,730 | 1,636   | > 0,10        | > 0,10        |                         |
| hsa-miR-409-3p             | 32,37 | 32,07        | 30,74        | 1 | 1,356 | 2,577   | > 0,10        | 0,0651        |                         |
| hsa-miR-409-5p             | 35,45 | 35,58        | 35,07        | 1 | 1,005 | 1,087   | > 0,10        | > 0,10        |                         |
| hsa-miR-410                | 35,76 | 35,27        | 34,29        | 1 | 1,551 | 2,317   | > 0,10        | > 0,10        |                         |
| hsa-miR-411                | 31,78 | 31,95        | 30,16        | 1 | 0,978 | 2,570   | > 0,10        | > 0,10        |                         |
| hsa-miR-421                | 34,90 | 35,00        | 33,50        | 1 | 1,027 | 2,205   | > 0,10        | > 0,10        |                         |
| hsa-miR-423-3p             | 28,94 | 29,03        | 27,92        | 1 | 1,030 | 1,682*  | > 0,10        | <b>0,0072</b> | agcucggucugaggccccucagu |
| hsa-miR-423-5p             | 30,78 | 30,57        | 29,45        | 1 | 1,270 | 2,091*  | > 0,10        | <b>0,0104</b> | ugaggggagagagcgagacu    |
| hsa-miR-423-5p (duplicate) | 30,66 | 30,70        | 29,53        | 1 | 1,068 | 1,830** | > 0,10        | <b>0,0023</b> |                         |
| hsa-miR-424                | 24,51 | 25,11        | 23,10        | 1 | 0,720 | 2,197*  | > 0,10        | <b>0,0451</b> | cagcagcauucauguuuugaa   |
| hsa-miR-424*               | 33,08 | 33,50        | 31,43        | 1 | 0,824 | 2,615*  | > 0,10        | <b>0,0294</b> | caaacgugaggcgucguau     |
| hsa-miR-425                | 31,51 | 31,69        | 31,00        | 1 | 0,969 | 1,187   | > 0,10        | > 0,10        |                         |
| hsa-miR-425*               | 32,89 | 33,12        | 32,27        | 1 | 0,942 | 1,282   | > 0,10        | > 0,10        |                         |
| hsa-miR-431                | 35,69 | 36,08        | 35,49        | 1 | 0,820 | 0,936   | > 0,10        | > 0,10        |                         |
| hsa-miR-431*               | 36,34 | 36,69        | 34,28        | 1 | 0,801 | 3,477   | > 0,10        | 0,0632        |                         |
| hsa-miR-432                | 36,38 | 36,66        | 35,05        | 1 | 0,908 | 2,094   | > 0,10        | > 0,10        |                         |
| hsa-miR-433                | 35,06 | 35,84        | 34,37        | 1 | 0,677 | 1,328   | > 0,10        | > 0,10        |                         |
| hsa-miR-449a               | 27,13 | 29,78        | <b>40,00</b> | 1 | 0,175 | 0,001** | <b>0,0308</b> | <b>0,0228</b> | uggcaguguauuguuagcuggu  |
| hsa-miR-449b               | 31,83 | 33,98        | <b>40,00</b> | 1 | 0,247 | 0,003** | 0,1014        | <b>0,0082</b> | aggcaguguauuguuagcuggc  |
| hsa-miR-449b*              | 32,72 | 32,97        | <b>40,00</b> | 1 | 0,811 | 0,005** | > 0,10        | <b>0,0086</b> | cagccacaacuaccucgaccu   |
| hsa-miR-450a               | 32,16 | 32,35        | 31,02        | 1 | 0,963 | 1,829*  | > 0,10        | <b>0,0230</b> | uuuugcgauguguuccuaauau  |
| hsa-miR-450b-3p            | 34,71 | 36,48        | 34,10        | 1 | 0,345 | 1,275   | > 0,10        | > 0,10        |                         |
| hsa-miR-450b-5p            | 37,35 | <b>38,41</b> | 36,21        | 1 | 0,529 | 1,841   | 0,0519        | > 0,10        | uuuugcaauauguuccugaaua  |
| hsa-miR-451                | 25,35 | 26,55        | 27,12        | 1 | 0,479 | 0,245*  | > 0,10        | <b>0,0172</b> | aaaccguuaccuuacugagu    |
| hsa-miR-452                | 36,17 | 36,27        | 36,37        | 1 | 1,103 | 0,745   | > 0,10        | > 0,10        |                         |
| hsa-miR-454                | 37,19 | 36,77        | 35,88        | 1 | 1,470 | 2,073*  | > 0,10        | <b>0,0336</b> | uagugcaauaugcuuauaggg   |
| hsa-miR-455-3p             | 31,80 | 31,47        | 29,04        | 1 | 1,384 | 5,642** | > 0,10        | <b>0,0059</b> | gcaguccaugggcauauacac   |
| hsa-miR-455-5p             | 35,01 | 34,74        | 32,57        | 1 | 1,328 | 4,531** | > 0,10        | <b>0,0115</b> | uaugugccuuuggacuacacg   |

|                  |              |              |              |   |          |         |               |               |                         |
|------------------|--------------|--------------|--------------|---|----------|---------|---------------|---------------|-------------------------|
| hsa-miR-483-3p   | 34,77        | 34,76        | 34,19        | 1 | 1,109    | 1,253   | > 0,10        | > 0,10        |                         |
| hsa-miR-484      | 30,98        | 31,08        | 30,56        | 1 | 1,032    | 1,121   | > 0,10        | > 0,10        |                         |
| hsa-miR-485-3p   | 34,31        | 33,98        | 33,11        | 1 | 1,387    | 1,917   | 0,0543        | 0,1015        |                         |
| hsa-miR-486-5p   | 31,68        | 32,72        | 33,63        | 1 | 0,522    | 0,210   | > 0,10        | <b>0,0189</b> | uccuguacugagcugccccgag  |
| hsa-miR-487b     | 35,03        | 35,51        | 33,97        | 1 | 0,790    | 1,741   | > 0,10        | > 0,10        |                         |
| hsa-miR-488      | 35,00        | 36,14        | <b>40,00</b> | 1 | 0,501    | 0,026** | 0,0688        | <b>0,0211</b> | uugaaaggcuauuucugguc    |
| hsa-miR-489      | 36,45        | 35,97        | 34,36        | 1 | 1,439    | 3,254*  | > 0,10        | <b>0,0425</b> | gugacaucauauacggcagc    |
| hsa-miR-491-5p   | 34,22        | 33,73        | 32,56        | 1 | 1,439    | 2,639   | > 0,10        | 0,0732        |                         |
| hsa-miR-493*     | 33,58        | 33,50        | 32,11        | 1 | 1,161    | 2,301   | > 0,10        | > 0,10        |                         |
| hsa-miR-494      | 37,34        | 36,93        | 35,43        | 1 | 1,461    | 3,133   | > 0,10        | 0,0855        |                         |
| hsa-miR-495      | 32,71        | 32,11        | 31,06        | 1 | 1,672    | 2,628   | > 0,10        | > 0,10        |                         |
| hsa-miR-497      | 27,84        | 28,05        | 26,60        | 1 | 0,953    | 1,958*  | > 0,10        | <b>0,0249</b> | cagcagcacacuggguuugu    |
| hsa-miR-498      | 35,83        | 36,76        | <b>40,00</b> | 1 | 0,581    | 0,046** | > 0,10        | <b>0,0065</b> | uuucaagccagggcguuuuuc   |
| hsa-miR-499-5p   | 35,29        | 35,85        | 35,56        | 1 | 0,748*   | 0,714   | <b>0,0499</b> | > 0,10        | uuuagacuugcagugauuuu    |
| hsa-miR-500      | 32,48        | 32,72        | 31,34        | 1 | 0,935    | 1,844*  | > 0,10        | <b>0,0119</b> | uaauccuugcuaccugggugaga |
| hsa-miR-501-3p   | 33,56        | 33,20        | 32,20        | 1 | 1,416    | 2,142   | > 0,10        | > 0,10        |                         |
| hsa-miR-501-5p   | 32,40        | 32,26        | 31,47        | 1 | 1,214    | 1,589   | > 0,10        | > 0,10        |                         |
| hsa-miR-502-3p   | 32,55        | 31,85        | 30,68        | 1 | 1,790    | 3,046*  | 0,0746        | <b>0,0044</b> | aaugcaccugggcaaggauuca  |
| hsa-miR-503      | 30,50        | 30,53        | 29,01        | 1 | 1,080    | 2,343*  | > 0,10        | <b>0,0038</b> | uagcagcgggaacaguucgag   |
| hsa-miR-504      | <b>40,00</b> | 35,86        | 35,31        | 1 | 19,442** | 19,719  | <b>0,0069</b> | > 0,10        | agaccucggucgacucuauc    |
| hsa-miR-505      | 34,20        | 33,62        | 32,55        | 1 | 1,649    | 2,609   | > 0,10        | > 0,10        |                         |
| hsa-miR-506      | 31,92        | 31,75        | 30,30        | 1 | 1,236    | 2,565*  | > 0,10        | <b>0,0351</b> | uaaggcaccuucugaguaga    |
| hsa-miR-508-3p   | 30,62        | 30,62        | 28,40        | 1 | 1,077    | 3,806*  | > 0,10        | <b>0,0327</b> | uacuccagaggcgucacucaug  |
| hsa-miR-508-5p   | 30,85        | 30,87        | 29,35        | 1 | 1,083    | 2,356   | > 0,10        | 0,0721        |                         |
| hsa-miR-509-3-5p | 28,78        | 28,88        | 27,37        | 1 | 1,027    | 2,206   | > 0,10        | 0,0573        |                         |
| hsa-miR-509-3p   | 28,85        | 28,92        | 27,10        | 1 | 1,049    | 2,803   | > 0,10        | 0,0508        |                         |
| hsa-miR-510      | 29,71        | 29,58        | 28,27        | 1 | 1,204    | 2,256   | > 0,10        | 0,0551        |                         |
| hsa-miR-511      | 34,37        | <b>40,00</b> | <b>40,00</b> | 1 | 0,022**  | 0,016** | <b>0,0045</b> | <b>0,0048</b> | gugucuuuugcucugcaguca   |
| hsa-miR-512-5p   | 33,38        | 34,05        | <b>40,00</b> | 1 | 0,695*   | 0,008** | <b>0,0042</b> | <b>0,0002</b> | cacucagccuagggcacuuc    |
| hsa-miR-513a-3p  | 30,28        | 30,29        | 28,85        | 1 | 1,093    | 2,244*  | > 0,10        | <b>0,0170</b> | uaaaauucaccuuucugagaagg |
| hsa-miR-513a-5p  | 30,45        | 30,53        | 29,07        | 1 | 1,038    | 2,175   | > 0,10        | 0,0845        |                         |
| hsa-miR-513c     | 29,29        | 29,34        | 28,06        | 1 | 1,065    | 1,952   | > 0,10        | 0,1008        |                         |
| hsa-miR-514      | 28,58        | 28,40        | 27,60        | 1 | 1,251    | 1,644   | > 0,10        | > 0,10        |                         |

|                        |       |              |              |   |        |         |               |               |                         |
|------------------------|-------|--------------|--------------|---|--------|---------|---------------|---------------|-------------------------|
| <i>hsa-miR-515-3p</i>  | 35,07 | 35,32        | <b>40,00</b> | 1 | 0,926  | 0,027** | > 0,10        | <b>0,0111</b> | gagugccuucuuuuuggagcguu |
| <i>hsa-miR-515-5p</i>  | 32,28 | 32,42        | <b>40,00</b> | 1 | 1,001  | 0,004** | > 0,10        | <b>0,0270</b> | uucuccaaaagaagcacuuucug |
| <i>hsa-miR-516a-3p</i> | 36,40 | 36,65        | <b>40,00</b> | 1 | 0,930  | 0,069   | > 0,10        | 0,0600        | ugcuuccuuucagaggggu     |
| <i>hsa-miR-516a-5p</i> | 36,18 | 37,72        | <b>40,00</b> | 1 | 0,379  | 0,059** | > 0,10        | <b>0,0042</b> | uucucgaggaagaagcacuuuc  |
| <i>hsa-miR-516b</i>    | 36,36 | <b>40,00</b> | <b>40,00</b> | 1 | 0,087  | 0,066   | 0,0995        | 0,0974        | aucuggagguaagaagcacuuu  |
| <i>hsa-miR-517a</i>    | 33,11 | 33,68        | <b>40,00</b> | 1 | 0,742  | 0,007** | 0,0967        | <b>0,0093</b> | aucgugcauccuuuagagugu   |
| <i>hsa-miR-517b</i>    | 31,78 | 32,61        | <b>40,00</b> | 1 | 0,621  | 0,003** | 0,0645        | <b>0,0021</b> | aucgugcauccuuuagagugu   |
| <i>hsa-miR-517c</i>    | 31,02 | 32,19        | <b>39,02</b> | 1 | 0,487  | 0,003*  | 0,0569        | <b>0,0207</b> | aucgugcauccuuuagagugu   |
| <i>hsa-miR-518a-3p</i> | 33,50 | 34,66        | <b>40,00</b> | 1 | 0,495  | 0,009** | > 0,10        | <b>0,0325</b> | gaaagcgcuuccuuugcugga   |
| <i>hsa-miR-518a-5p</i> | 36,02 | 35,83        | <b>40,00</b> | 1 | 1,173  | 0,053** | > 0,10        | <b>0,0298</b> | cugcaaaggaagccuuuc      |
| <i>hsa-miR-518b</i>    | 34,07 | 34,17        | <b>40,00</b> | 1 | 1,062  | 0,014*  | > 0,10        | <b>0,0331</b> | caaagcgcuuccuuuagaggu   |
| <i>hsa-miR-518c</i>    | 33,18 | 33,42        | <b>40,00</b> | 1 | 0,929  | 0,007** | > 0,10        | <b>0,0021</b> | caaagcgcuucuuuagagugu   |
| <i>hsa-miR-518c*</i>   | 35,16 | 35,54        | <b>40,00</b> | 1 | 0,827  | 0,028   | > 0,10        | > 0,10        | ucucuggagggaagcacuuucug |
| <i>hsa-miR-518d-5p</i> | 34,10 | 34,59        | <b>38,20</b> | 1 | 0,731  | 0,052   | > 0,10        | 0,0726        | cucuagagggaagcacuuucug  |
| <i>hsa-miR-518e</i>    | 31,55 | 32,69        | <b>40,00</b> | 1 | 0,498  | 0,002** | 0,0765        | <b>0,0104</b> | aaagcgcuuccuuucagagug   |
| <i>hsa-miR-518e*</i>   | 32,44 | 32,76        | <b>40,00</b> | 1 | 0,819  | 0,004** | > 0,10        | <b>0,0043</b> | cucuagagggaagcgcuucug   |
| <i>hsa-miR-518f</i>    | 32,80 | 33,52        | <b>40,00</b> | 1 | 0,665* | 0,006** | <b>0,0349</b> | <b>0,0069</b> | gaaagcgcuucuuuagagg     |
| <i>hsa-miR-518f*</i>   | 33,53 | 33,72        | <b>38,52</b> | 1 | 0,969  | 0,026*  | > 0,10        | <b>0,0275</b> | cucuagagggaagcacuuucuc  |
| <i>hsa-miR-519a</i>    | 33,02 | 34,08        | <b>40,00</b> | 1 | 0,529  | 0,007** | 0,0986        | <b>0,0009</b> | aaagugcauccuuuagagugu   |
| <i>hsa-miR-519b-3p</i> | 32,28 | 32,71        | <b>40,00</b> | 1 | 0,816  | 0,004** | > 0,10        | <b>0,0275</b> | aaagugcauccuuuagagggu   |
| <i>hsa-miR-519c-3p</i> | 33,34 | 34,49        | <b>40,00</b> | 1 | 0,494* | 0,008** | <b>0,0483</b> | <b>0,0169</b> | aaagugcauccuuuagaggau   |
| <i>hsa-miR-519d</i>    | 32,83 | 32,44        | <b>40,00</b> | 1 | 1,438  | 0,006** | > 0,10        | <b>0,0216</b> | caaagugccuccuuuagagug   |
| <i>hsa-miR-519e</i>    | 35,69 | 36,28        | <b>40,00</b> | 1 | 0,735  | 0,042** | > 0,10        | <b>0,0336</b> | aagugccuccuuuagaguguu   |
| <i>hsa-miR-519e*</i>   | 33,84 | 34,28        | <b>40,00</b> | 1 | 0,814  | 0,012** | > 0,10        | <b>0,0139</b> | uucuccaaaaggagcacuuuc   |
| <i>hsa-miR-520a-3p</i> | 36,82 | <b>38,31</b> | <b>40,00</b> | 1 | 0,391  | 0,092** | > 0,10        | <b>0,0494</b> | aaagugcuuccuuuggacugu   |
| <i>hsa-miR-520a-5p</i> | 33,89 | 34,77        | <b>40,00</b> | 1 | 0,599  | 0,012** | > 0,10        | <b>0,0157</b> | cuccagagggaaguacuuuc    |
| <i>hsa-miR-520b</i>    | 31,03 | 31,22        | <b>40,00</b> | 1 | 0,968  | 0,002** | > 0,10        | <b>0,0048</b> | aaagugcuuccuuuagagg     |
| <i>hsa-miR-520c-3p</i> | 30,67 | 30,95        | <b>40,00</b> | 1 | 0,908  | 0,001** | > 0,10        | <b>0,0131</b> | aaagugcuuccuuuagagggu   |
| <i>hsa-miR-520d-5p</i> | 35,45 | 35,82        | <b>40,00</b> | 1 | 0,770  | 0,037   | > 0,10        | > 0,10        | cuacaaaggaagccuuuc      |
| <i>hsa-miR-520e</i>    | 34,52 | 34,54        | <b>40,00</b> | 1 | 1,084  | 0,018   | > 0,10        | 0,0973        | aaagugcuuccuuuagagg     |
| <i>hsa-miR-520f</i>    | 31,25 | 31,69        | <b>40,00</b> | 1 | 0,807  | 0,002** | > 0,10        | <b>0,0169</b> | aagugcuuccuuuagagggu    |
| <i>hsa-miR-520g</i>    | 32,82 | 33,22        | <b>40,00</b> | 1 | 0,836  | 0,006** | > 0,10        | <b>0,0020</b> | acaaagugcuuccuuuagagugu |
| <i>hsa-miR-520h</i>    | 32,39 | 32,71        | <b>40,00</b> | 1 | 0,795  | 0,004** | > 0,10        | <b>0,0480</b> | acaaagugcuuccuuuagagu   |

|                       |              |              |              |   |          |         |               |               |                         |
|-----------------------|--------------|--------------|--------------|---|----------|---------|---------------|---------------|-------------------------|
| <i>hsa-miR-521</i>    | 36,43        | <b>40,00</b> | <b>40,00</b> | 1 | 0,093**  | 0,070** | <b>0,0147</b> | <b>0,0141</b> | aacgcacuuccuuagagugu    |
| <i>hsa-miR-522</i>    | 37,12        | 37,83        | <b>40,00</b> | 1 | 0,671    | 0,113** | > 0,10        | <b>0,0091</b> | aaaaugguuccuuagagugu    |
| <i>hsa-miR-523</i>    | 34,38        | 34,73        | <b>38,92</b> | 1 | 0,866    | 0,036*  | > 0,10        | <b>0,0318</b> | gaacgcguuccuauagagggu   |
| <i>hsa-miR-524-3p</i> | 35,88        | 35,44        | <b>40,00</b> | 1 | 1,485    | 0,047   | > 0,10        | > 0,10        | gaaggcguuccuuaggagu     |
| <i>hsa-miR-524-5p</i> | 34,46        | 33,78        | <b>39,27</b> | 1 | 1,766    | 0,030*  | 0,0694        | <b>0,0462</b> | cuacaaagggaagcacuuucuc  |
| <i>hsa-miR-525-3p</i> | 34,44        | 34,05        | 37,66        | 1 | 1,444    | 0,090   | > 0,10        | > 0,10        |                         |
| <i>hsa-miR-525-5p</i> | 34,31        | 35,50        | <b>40,00</b> | 1 | 0,449    | 0,016** | > 0,10        | <b>0,0247</b> | cuccagagggaugcacuuucu   |
| <i>hsa-miR-526b</i>   | 35,48        | 36,20        | <b>40,00</b> | 1 | 0,669    | 0,036   | > 0,10        | 0,0864        | cucuugagggaagcacuuucugu |
| <i>hsa-miR-526b*</i>  | 32,94        | 32,94        | <b>40,00</b> | 1 | 1,100    | 0,006** | > 0,10        | <b>0,0024</b> | gaaagugcuuccuuuagaggc   |
| <i>hsa-miR-532-3p</i> | 31,46        | 31,01        | 29,98        | 1 | 1,505    | 2,333** | 0,0512        | <b>0,0137</b> | ccuccacaccaagguugca     |
| <i>hsa-miR-532-5p</i> | 32,31        | 31,87        | 30,65        | 1 | 1,496    | 2,642*  | > 0,10        | <b>0,0013</b> | caugccuugaguguaggaccgu  |
| <i>hsa-miR-542-5p</i> | 31,79        | 31,91        | 30,79        | 1 | 1,011    | 1,665*  | > 0,10        | <b>0,0464</b> | ucggggaucaucaugucacgaga |
| <i>hsa-miR-543</i>    | 33,54        | 33,48        | 31,57        | 1 | 1,145    | 3,257   | > 0,10        | > 0,10        |                         |
| <i>hsa-miR-545</i>    | 35,75        | 36,31        | 34,97        | 1 | 0,746    | 1,430   | > 0,10        | > 0,10        |                         |
| <i>hsa-miR-548o</i>   | <b>40,00</b> | 36,82        | 36,69        | 1 | 9,952    | 8,101*  | 0,1027        | <b>0,0230</b> | ccaaaacugcaguuaucuuuugc |
| <i>hsa-miR-550</i>    | 36,30        | 36,04        | <b>40,00</b> | 1 | 1,366    | 0,067   | > 0,10        | 0,0762        | agugccugaggaguaagagccc  |
| <i>hsa-miR-550*</i>   | 34,95        | 35,30        | 35,77        | 1 | 0,860    | 0,470   | > 0,10        | 0,0704        |                         |
| <i>hsa-miR-551a</i>   | <b>40,00</b> | 34,46        | 35,11        | 1 | 51,436** | 26,342  | <b>0,0092</b> | > 0,10        | gcgaccacucuuugguuucca   |
| <i>hsa-miR-551b</i>   | 31,98        | 33,02        | 34,99        | 1 | 0,534    | 0,094   | > 0,10        | 0,0573        |                         |
| <i>hsa-miR-566</i>    | 35,11        | 36,33        | 35,65        | 1 | 0,498    | 1,000   | 0,0647        | 0,0524        |                         |
| <i>hsa-miR-574-3p</i> | 29,45        | 29,21        | 27,90        | 1 | 1,305    | 2,437*  | > 0,10        | <b>0,0053</b> | cacgcucaugcacacaccaca   |
| <i>hsa-miR-582-5p</i> | 36,27        | 36,47        | 33,95        | 1 | 0,962    | 4,181*  | > 0,10        | <b>0,0312</b> | uuacaguuguuaccaguuacu   |
| <i>hsa-miR-584</i>    | 36,28        | 34,65        | 34,26        | 1 | 2,415    | 2,384   | > 0,10        | > 0,10        |                         |
| <i>hsa-miR-590-5p</i> | 32,47        | 32,70        | 32,10        | 1 | 0,941    | 1,072   | > 0,10        | > 0,10        |                         |
| <i>hsa-miR-597</i>    | <b>40,00</b> | <b>40,00</b> | 37,39        | 1 | 1,102    | 5,090** | > 0,10        | <b>0,0144</b> | ugugucacucgaugaccacugu  |
| <i>hsa-miR-598</i>    | 33,50        | 33,84        | 32,49        | 1 | 0,867    | 1,673   | > 0,10        | > 0,10        |                         |
| <i>hsa-miR-605</i>    | 31,07        | 30,96        | 31,35        | 1 | 1,195    | 0,690   | > 0,10        | > 0,10        |                         |
| <i>hsa-miR-615-3p</i> | 34,77        | 35,37        | 34,72        | 1 | 0,717    | 0,878   | > 0,10        | > 0,10        |                         |
| <i>hsa-miR-625*</i>   | 33,53        | 35,42        | 35,12        | 1 | 0,296*   | 0,276** | <b>0,0293</b> | <b>0,0351</b> | gacuaugaacuuccccuca     |
| <i>hsa-miR-628-3p</i> | 34,34        | 34,96        | 34,84        | 1 | 0,716    | 0,587   | > 0,10        | 0,0837        |                         |
| <i>hsa-miR-629</i>    | 34,12        | 35,44        | 35,08        | 1 | 0,440    | 0,427*  | 0,0702        | <b>0,0032</b> | uggguuuacguugggagaacu   |
| <i>hsa-miR-643</i>    | 31,78        | 33,48        | 33,72        | 1 | 0,353    | 0,225*  | 0,0547        | <b>0,0404</b> | acuuguauagcuagcucagguag |
| <i>hsa-miR-651</i>    | 35,55        | 35,43        | 34,62        | 1 | 1,199    | 1,597   | > 0,10        | > 0,10        |                         |

|                |       |              |              |   |       |         |               |               |                         |
|----------------|-------|--------------|--------------|---|-------|---------|---------------|---------------|-------------------------|
| hsa-miR-652    | 32,61 | 32,93        | 31,58        | 1 | 0,879 | 1,694   | > 0,10        | 0,0717        |                         |
| hsa-miR-654-3p | 32,70 | 33,11        | 31,81        | 1 | 0,826 | 1,541   | > 0,10        | > 0,10        |                         |
| hsa-miR-654-5p | 36,41 | 36,83        | 35,47        | 1 | 0,821 | 1,601   | > 0,10        | > 0,10        |                         |
| hsa-miR-660    | 32,54 | 32,75        | 31,34        | 1 | 0,950 | 1,914   | > 0,10        | <b>0,0241</b> | uaccgauugcauauccggaguug |
| hsa-miR-663    | 29,26 | 29,66        | 29,41        | 1 | 0,839 | 0,753   | > 0,10        | > 0,10        |                         |
| hsa-miR-664    | 32,17 | 31,87        | 30,87        | 1 | 1,362 | 2,064   | 0,1040        | 0,1091        |                         |
| hsa-miR-675*   | 34,33 | 34,27        | 33,50        | 1 | 1,105 | 1,539   | > 0,10        | > 0,10        |                         |
| hsa-miR-7      | 33,82 | 33,72        | <b>38,00</b> | 1 | 1,181 | 0,046*  | > 0,10        | <b>0,0000</b> | uggaagacuaguuuuuguugu   |
| hsa-miR-708    | 34,12 | 33,43        | 32,30        | 1 | 1,775 | 2,929   | > 0,10        | > 0,10        |                         |
| hsa-miR-708*   | 36,29 | 35,85        | 35,58        | 1 | 1,574 | 1,271   | > 0,10        | > 0,10        |                         |
| hsa-miR-7-1*   | 35,99 | 36,27        | 37,50        | 1 | 0,902 | 0,292** | > 0,10        | <b>0,0036</b> | caacaaucacagucugccaau   |
| hsa-miR-720    | 21,91 | 21,70        | 21,79        | 1 | 1,275 | 0,906   | > 0,10        | > 0,10        |                         |
| hsa-miR-744    | 35,37 | 35,40        | 34,09        | 1 | 1,079 | 2,031*  | > 0,10        | <b>0,0135</b> | ugcggggcuaggguaacagca   |
| hsa-miR-744*   | 34,41 | 34,49        | 33,21        | 1 | 1,018 | 1,994   | > 0,10        | > 0,10        |                         |
| hsa-miR-760    | 33,89 | 33,38        | 33,58        | 1 | 1,537 | 1,008   | > 0,10        | > 0,10        |                         |
| hsa-miR-766    | 31,43 | 31,15        | 30,01        | 1 | 1,344 | 2,241*  | > 0,10        | <b>0,0393</b> | acuccagccccacagccucagc  |
| hsa-miR-769-3p | 35,69 | 36,50        | 36,12        | 1 | 0,629 | 0,635   | > 0,10        | > 0,10        |                         |
| hsa-miR-769-5p | 32,07 | 32,82        | 32,80        | 1 | 0,656 | 0,503*  | > 0,10        | <b>0,0236</b> | ugagaccucuggguucugagcu  |
| hsa-miR-873    | 33,46 | 34,26        | 32,08        | 1 | 0,632 | 2,158   | > 0,10        | > 0,10        |                         |
| hsa-miR-876-3p | 36,21 | 37,21        | 34,82        | 1 | 0,549 | 2,247   | > 0,10        | > 0,10        |                         |
| hsa-miR-876-5p | 35,87 | 37,76        | 34,30        | 1 | 0,296 | 2,550   | > 0,10        | > 0,10        |                         |
| hsa-miR-885-5p | 36,79 | <b>38,27</b> | <b>40,00</b> | 1 | 0,397 | 0,090** | <b>0,0278</b> | <b>0,0164</b> | uccauuacacuaccugccucu   |
| hsa-miR-886-3p | 30,57 | 30,42        | 28,74        | 1 | 1,222 | 2,966   | > 0,10        | 0,1004        |                         |
| hsa-miR-886-5p | 33,81 | 33,83        | 33,81        | 1 | 1,081 | 0,830   | > 0,10        | > 0,10        |                         |
| hsa-miR-887    | 34,77 | 34,48        | 34,14        | 1 | 1,252 | 1,287   | > 0,10        | > 0,10        |                         |
| hsa-miR-888    | 35,88 | <b>40,00</b> | <b>40,00</b> | 1 | 0,062 | 0,047   | > 0,10        | > 0,10        | uacucaaaaagcugucaguca   |
| hsa-miR-891a   | 32,78 | 33,07        | <b>38,60</b> | 1 | 0,902 | 0,015   | > 0,10        | <b>0,0001</b> | ugcaacgaaccugagccacuga  |
| hsa-miR-9      | 32,60 | 33,54        | 34,23        | 1 | 0,575 | 0,270   | > 0,10        | > 0,10        |                         |
| hsa-miR-92a    | 27,14 | 27,21        | 26,14        | 1 | 1,051 | 1,670*  | > 0,10        | <b>0,0166</b> | uauugcacuugcccggccugu   |
| hsa-miR-92b    | 32,85 | 33,11        | 32,68        | 1 | 0,922 | 0,934   | > 0,10        | > 0,10        |                         |
| hsa-miR-92b*   | 36,21 | 36,48        | 36,40        | 1 | 0,914 | 0,729   | > 0,10        | > 0,10        |                         |
| hsa-miR-93     | 29,67 | 30,02        | 30,14        | 1 | 0,865 | 0,602   | > 0,10        | 0,0772        |                         |
| hsa-miR-93*    | 33,83 | 33,74        | 34,10        | 1 | 1,174 | 0,694   | > 0,10        | > 0,10        |                         |

|                   |              |       |              |   |        |        |        |               |                         |
|-------------------|--------------|-------|--------------|---|--------|--------|--------|---------------|-------------------------|
| hsa-miR-940       | 27,13        | 27,43 | 26,95        | 1 | 0,897  | 0,945  | > 0,10 | > 0,10        |                         |
| hsa-miR-941       | 35,39        | 35,54 | 33,99        | 1 | 0,994  | 2,207  | > 0,10 | > 0,10        |                         |
| hsa-miR-95        | 34,13        | 34,37 | 33,86        | 1 | 0,938  | 1,009  | > 0,10 | > 0,10        |                         |
| hsa-miR-96        | 33,08        | 35,49 | <b>39,29</b> | 1 | 0,207  | 0,011  | 0,0850 | 0,0594        | uuuggcacuagcacauuuuugcu |
| hsa-miR-98        | 36,93        | 36,60 | 35,37        | 1 | 1,389  | 2,469  | > 0,10 | <b>0,0335</b> | ugagguaguaaguuguuuuguu  |
| hsa-miR-99a       | 26,56        | 26,42 | 25,14        | 1 | 1,212  | 2,241* | > 0,10 | <b>0,0116</b> | aaccguagauccgaucuuugug  |
| hsa-miR-99a*      | 31,98        | 31,32 | 30,17        | 1 | 1,735  | 2,923  | > 0,10 | <b>0,0235</b> | caagcucgcuucuaugggucug  |
| hsa-miR-99b       | 28,30        | 28,10 | 27,04        | 1 | 1,264  | 1,990* | 0,0878 | <b>0,0264</b> | caccguagaaccgaccuuugcg  |
| hsa-miR-99b*      | 33,18        | 32,71 | 31,74        | 1 | 1,525  | 2,266* | 0,1013 | <b>0,0161</b> | caagcucgugucugugggucg   |
| hsa-miR-505*      | <b>40,00</b> | 36,66 | 35,35        | 1 | 12,882 | 19,181 | > 0,10 | > 0,10        | gggagccaggaaguauugaugu  |
| hsa-miR-629*      | 36,24        | 34,83 | <b>40,00</b> | 1 | 2,527  | 0,061  | > 0,10 | > 0,10        | guucucccaacguaagcccagc  |
| hsa-miR-661       | 34,76        | 36,17 | <b>40,00</b> | 1 | 0,357  | 0,022  | > 0,10 | > 0,10        | ugccugggucucuggccugcgcu |
| hsa-miR-649       | 36,43        | 36,92 | <b>40,00</b> | 1 | 0,934  | 0,073  | > 0,10 | > 0,10        | aaaccuguguuguucaagaguc  |
| hsa-miR-20b*      | 32,16        | 32,62 | 30,92        | 1 | 0,774  | 1,750  | > 0,10 | 0,0543        |                         |
| hsa-miR-767-5p    | 35,72        | 35,50 | 37,74        | 1 | 1,488  | 0,213  | > 0,10 | > 0,10        |                         |
| hsa-miR-548b-3p   | 36,09        | 36,50 | 36,91        | 1 | 0,719  | 0,432  | > 0,10 | > 0,10        |                         |
| hsa-miR-675b      | 35,23        | 35,96 | 35,31        | 1 | 0,569  | 0,775  | > 0,10 | > 0,10        |                         |
| hsa-miR-338-5p    | 36,92        | 36,51 | 37,56        | 1 | 1,670  | 0,528  | > 0,10 | > 0,10        |                         |
| hsa-miRPlus-C1089 | 34,41        | 34,53 | 33,61        | 1 | 1,011  | 1,444  | > 0,10 | 0,1010        |                         |
| hsa-miRPlus-D1033 | 33,54        | 34,30 | 33,56        | 1 | 0,651  | 0,823  | > 0,10 | > 0,10        |                         |
| SNORD38B          | 24,38        | 24,22 | 23,90        | 1 | 1,226  | 1,166  | > 0,10 | > 0,10        |                         |
| SNORD38B          | 24,20        | 24,07 | 23,78        | 1 | 1,207  | 1,122  | > 0,10 | > 0,10        |                         |
| SNORD49A          | 25,12        | 24,97 | 24,53        | 1 | 1,224  | 1,258  | > 0,10 | > 0,10        |                         |
| SNORD49A          | 24,79        | 24,79 | 24,23        | 1 | 1,099  | 1,226  | > 0,10 | > 0,10        |                         |
| U6                | 21,34        | 21,18 | 20,90        | 1 | 1,230  | 1,132  | > 0,10 | > 0,10        |                         |
| U6                | 21,34        | 21,18 | 20,90        | 1 | 1,230  | 1,132  | > 0,10 | > 0,10        |                         |

---



**Supplemental Table S2.** Pearson correlation coefficients (r) and adjusted p-values (p) between the molecular and histological parameters for the nine samples analysed in miRNA profiling. Significant differences are indicated in bold.

|               |                                     | Sertoli cell | Spermatogonia | Spermatocyte I | Round sp      | Elongated sp  | TESE value    | Johnsen Score |
|---------------|-------------------------------------|--------------|---------------|----------------|---------------|---------------|---------------|---------------|
| hsa_let_7a    | Pearson correlation coefficient (r) | <b>0,743</b> | <b>-0,958</b> | <b>-0,834</b>  | -0,454        | -0,382        | -0,400        | <b>-0,730</b> |
|               | Adjusted p-value                    | <b>0,022</b> | <b>0,000</b>  | <b>0,005</b>   | 0,220         | 0,310         | 0,287         | <b>0,026</b>  |
| hsa_let_7a#   | Pearson correlation coefficient (r) | 0,433        | <b>-0,752</b> | <b>-0,715</b>  | -0,586        | -0,513        | -0,525        | <b>-0,768</b> |
|               | Adjusted p-value                    | 0,245        | <b>0,019</b>  | <b>0,030</b>   | 0,097         | 0,158         | 0,146         | <b>0,016</b>  |
| hsa_let_7a_2# | Pearson correlation coefficient (r) | -0,054       | 0,075         | -0,064         | -0,376        | -0,445        | -0,407        | -0,285        |
|               | Adjusted p-value                    | 0,890        | 0,849         | 0,869          | 0,319         | 0,230         | 0,277         | 0,458         |
| hsa_let_7b    | Pearson correlation coefficient (r) | <b>0,763</b> | <b>-0,941</b> | <b>-0,918</b>  | -0,533        | -0,484        | -0,501        | <b>-0,794</b> |
|               | Adjusted p-value                    | <b>0,017</b> | <b>0,000</b>  | <b>0,000</b>   | 0,140         | 0,186         | 0,170         | <b>0,011</b>  |
| hsa_let_7b#   | Pearson correlation coefficient (r) | <b>0,828</b> | <b>-0,742</b> | <b>-0,807</b>  | <b>-0,745</b> | <b>-0,719</b> | <b>-0,703</b> | <b>-0,912</b> |
|               | Adjusted p-value                    | <b>0,006</b> | <b>0,022</b>  | <b>0,009</b>   | <b>0,021</b>  | <b>0,029</b>  | <b>0,035</b>  | <b>0,001</b>  |
| hsa_let_7c    | Pearson correlation coefficient (r) | <b>0,768</b> | <b>-0,944</b> | <b>-0,873</b>  | -0,469        | -0,410        | -0,424        | <b>-0,746</b> |
|               | Adjusted p-value                    | <b>0,016</b> | <b>0,000</b>  | <b>0,002</b>   | 0,203         | 0,273         | 0,256         | <b>0,021</b>  |
| hsa_let_7d    | Pearson correlation coefficient (r) | <b>0,747</b> | <b>-0,972</b> | <b>-0,797</b>  | -0,397        | -0,298        | -0,330        | <b>-0,682</b> |
|               | Adjusted p-value                    | <b>0,021</b> | <b>0,000</b>  | <b>0,010</b>   | 0,290         | 0,436         | 0,386         | <b>0,043</b>  |
| hsa_let_7d#   | Pearson correlation coefficient (r) | -0,253       | 0,466         | 0,150          | 0,013         | -0,072        | -0,043        | 0,099         |
|               | Adjusted p-value                    | 0,512        | 0,206         | 0,700          | 0,974         | 0,854         | 0,914         | 0,801         |
| hsa_let_7e    | Pearson correlation coefficient (r) | <b>0,830</b> | <b>-0,927</b> | <b>-0,837</b>  | -0,628        | -0,546        | -0,576        | <b>-0,842</b> |
|               | Adjusted p-value                    | <b>0,006</b> | <b>0,000</b>  | <b>0,005</b>   | 0,070         | 0,128         | 0,105         | <b>0,004</b>  |
| hsa_let_7f    | Pearson correlation coefficient (r) | <b>0,696</b> | <b>-0,793</b> | -0,590         | -0,515        | -0,390        | -0,426        | <b>-0,675</b> |
|               | Adjusted p-value                    | <b>0,037</b> | <b>0,011</b>  | 0,094          | 0,156         | 0,299         | 0,252         | <b>0,046</b>  |
| hsa_let_7f_1# | Pearson correlation coefficient (r) | <b>0,871</b> | <b>-0,814</b> | <b>-0,875</b>  | -0,484        | -0,522        | -0,490        | <b>-0,727</b> |
|               | Adjusted p-value                    | <b>0,002</b> | <b>0,008</b>  | <b>0,002</b>   | 0,186         | 0,150         | 0,181         | <b>0,026</b>  |
| hsa_let_7f_2# | Pearson correlation coefficient (r) | <b>0,749</b> | <b>-0,783</b> | <b>-0,690</b>  | -0,271        | -0,236        | -0,226        | -0,520        |
|               | Adjusted p-value                    | <b>0,020</b> | <b>0,013</b>  | <b>0,040</b>   | 0,481         | 0,541         | 0,559         | 0,151         |
| hsa_let_7g    | Pearson correlation coefficient (r) | <b>0,855</b> | <b>-0,951</b> | <b>-0,834</b>  | -0,602        | -0,527        | -0,548        | <b>-0,827</b> |
|               | Adjusted p-value                    | <b>0,003</b> | <b>0,000</b>  | <b>0,005</b>   | 0,087         | 0,145         | 0,127         | <b>0,006</b>  |
| hsa_let_7g#   | Pearson correlation coefficient (r) | <b>0,798</b> | <b>-0,883</b> | <b>-0,693</b>  | -0,493        | -0,432        | -0,422        | <b>-0,736</b> |
|               | Adjusted p-value                    | <b>0,010</b> | <b>0,002</b>  | <b>0,038</b>   | 0,177         | 0,246         | 0,258         | <b>0,024</b>  |
| hsa_let_7i    | Pearson correlation coefficient (r) | <b>0,701</b> | <b>-0,922</b> | <b>-0,842</b>  | -0,497        | -0,432        | -0,452        | <b>-0,749</b> |

|                 |                                     |               |               |               |              |              |              |               |
|-----------------|-------------------------------------|---------------|---------------|---------------|--------------|--------------|--------------|---------------|
|                 | Adjusted p-value                    | <b>0,035</b>  | <b>0,000</b>  | <b>0,004</b>  | 0,173        | 0,246        | 0,222        | <b>0,020</b>  |
| hsa_let_7i#     | Pearson correlation coefficient (r) | 0,429         | <b>-0,709</b> | -0,667        | -0,656       | -0,598       | -0,619       | <b>-0,744</b> |
|                 | Adjusted p-value                    | 0,249         | <b>0,033</b>  | 0,050         | 0,055        | 0,089        | 0,075        | <b>0,022</b>  |
| hsa_miR_1       | Pearson correlation coefficient (r) | -0,210        | 0,208         | 0,071         | -0,390       | -0,362       | -0,371       | -0,203        |
|                 | Adjusted p-value                    | 0,587         | 0,592         | 0,855         | 0,300        | 0,338        | 0,326        | 0,601         |
| hsa_miR_100     | Pearson correlation coefficient (r) | 0,659         | <b>-0,879</b> | <b>-0,885</b> | -0,648       | -0,595       | -0,611       | <b>-0,851</b> |
|                 | Adjusted p-value                    | 0,054         | <b>0,002</b>  | <b>0,002</b>  | 0,059        | 0,091        | 0,081        | <b>0,004</b>  |
| hsa_miR_101     | Pearson correlation coefficient (r) | 0,428         | -0,666        | -0,510        | -0,454       | -0,336       | -0,375       | -0,579        |
|                 | Adjusted p-value                    | 0,250         | 0,050         | 0,160         | 0,220        | 0,377        | 0,320        | 0,103         |
| hsa_miR_101#    | Pearson correlation coefficient (r) | 0,292         | -0,526        | -0,567        | -0,353       | -0,299       | -0,342       | -0,471        |
|                 | Adjusted p-value                    | 0,445         | 0,146         | 0,111         | 0,351        | 0,434        | 0,368        | 0,201         |
| hsa_miR_103     | Pearson correlation coefficient (r) | <b>0,848</b>  | <b>-0,914</b> | <b>-0,794</b> | -0,578       | -0,483       | -0,508       | <b>-0,801</b> |
|                 | Adjusted p-value                    | <b>0,004</b>  | <b>0,001</b>  | <b>0,011</b>  | 0,103        | 0,187        | 0,162        | <b>0,009</b>  |
| hsa_miR_103_dup | Pearson correlation coefficient (r) | <b>0,783</b>  | <b>-0,907</b> | <b>-0,796</b> | -0,527       | -0,420       | -0,451       | <b>-0,770</b> |
|                 | Adjusted p-value                    | <b>0,013</b>  | <b>0,001</b>  | <b>0,010</b>  | 0,145        | 0,261        | 0,223        | <b>0,015</b>  |
| hsa_miR_103_2#  | Pearson correlation coefficient (r) | 0,642         | <b>-0,931</b> | <b>-0,906</b> | -0,430       | -0,387       | -0,395       | <b>-0,735</b> |
|                 | Adjusted p-value                    | 0,086         | <b>0,001</b>  | <b>0,002</b>  | 0,287        | 0,343        | 0,332        | <b>0,038</b>  |
| hsa_miR_103_as  | Pearson correlation coefficient (r) | <b>0,880</b>  | <b>-0,783</b> | <b>-0,688</b> | -0,318       | -0,249       | -0,269       | -0,564        |
|                 | Adjusted p-value                    | <b>0,002</b>  | <b>0,013</b>  | <b>0,040</b>  | 0,404        | 0,519        | 0,484        | 0,114         |
| hsa_miR_105     | Pearson correlation coefficient (r) | <b>-0,755</b> | <b>0,886</b>  | <b>0,820</b>  | 0,644        | 0,597        | 0,603        | <b>0,827</b>  |
|                 | Adjusted p-value                    | <b>0,019</b>  | <b>0,001</b>  | <b>0,007</b>  | 0,061        | 0,089        | 0,086        | <b>0,006</b>  |
| hsa_miR_106a    | Pearson correlation coefficient (r) | <b>0,712</b>  | <b>-0,747</b> | -0,480        | -0,301       | -0,190       | -0,210       | -0,529        |
|                 | Adjusted p-value                    | <b>0,032</b>  | <b>0,021</b>  | 0,191         | 0,431        | 0,624        | 0,588        | 0,143         |
| hsa_miR_106b    | Pearson correlation coefficient (r) | 0,262         | -0,224        | 0,052         | 0,067        | 0,174        | 0,159        | 0,005         |
|                 | Adjusted p-value                    | 0,496         | 0,563         | 0,895         | 0,864        | 0,654        | 0,683        | 0,990         |
| hsa_miR_106b#   | Pearson correlation coefficient (r) | -0,600        | 0,660         | <b>0,851</b>  | <b>0,721</b> | <b>0,692</b> | <b>0,718</b> | <b>0,829</b>  |
|                 | Adjusted p-value                    | 0,087         | 0,053         | <b>0,004</b>  | <b>0,028</b> | <b>0,039</b> | <b>0,029</b> | <b>0,006</b>  |
| hsa_miR_107     | Pearson correlation coefficient (r) | <b>0,785</b>  | <b>-0,899</b> | <b>-0,861</b> | -0,548       | -0,479       | -0,491       | <b>-0,810</b> |
|                 | Adjusted p-value                    | <b>0,012</b>  | <b>0,001</b>  | <b>0,003</b>  | 0,127        | 0,192        | 0,180        | <b>0,008</b>  |
| hsa_miR_10a     | Pearson correlation coefficient (r) | -0,319        | 0,620         | <b>0,872</b>  | 0,201        | 0,268        | 0,252        | 0,458         |
|                 | Adjusted p-value                    | 0,403         | 0,075         | <b>0,002</b>  | 0,604        | 0,485        | 0,513        | 0,215         |
| hsa_miR_10b     | Pearson correlation coefficient (r) | 0,542         | -0,586        | <b>-0,680</b> | -0,616       | -0,535       | -0,574       | <b>-0,723</b> |
|                 | Adjusted p-value                    | 0,132         | 0,097         | <b>0,044</b>  | 0,078        | 0,138        | 0,106        | <b>0,028</b>  |

|                 |                                     |              |               |               |               |               |               |               |
|-----------------|-------------------------------------|--------------|---------------|---------------|---------------|---------------|---------------|---------------|
| hsa_miR_10b#    | Pearson correlation coefficient (r) | <b>0,723</b> | -0,639        | <b>-0,677</b> | <b>-0,912</b> | <b>-0,879</b> | <b>-0,884</b> | <b>-0,944</b> |
|                 | Adjusted p-value                    | <b>0,028</b> | 0,064         | <b>0,045</b>  | <b>0,001</b>  | <b>0,002</b>  | <b>0,002</b>  | <b>0,000</b>  |
| hsa_miR_1185    | Pearson correlation coefficient (r) | 0,576        | <b>-0,841</b> | -0,589        | -0,358        | -0,253        | -0,275        | -0,595        |
|                 | Adjusted p-value                    | 0,104        | <b>0,004</b>  | 0,095         | 0,343         | 0,511         | 0,474         | 0,091         |
| hsa_miR_1201    | Pearson correlation coefficient (r) | -0,110       | 0,276         | 0,495         | 0,389         | 0,455         | 0,422         | 0,420         |
|                 | Adjusted p-value                    | 0,777        | 0,472         | 0,176         | 0,300         | 0,219         | 0,258         | 0,261         |
| hsa_miR_122     | Pearson correlation coefficient (r) | -0,546       | 0,370         | 0,585         | <b>0,942</b>  | <b>0,975</b>  | <b>0,948</b>  | <b>0,905</b>  |
|                 | Adjusted p-value                    | 0,129        | 0,327         | 0,098         | <b>0,000</b>  | <b>0,000</b>  | <b>0,000</b>  | <b>0,001</b>  |
| hsa_miR_124     | Pearson correlation coefficient (r) | -0,373       | 0,504         | <b>0,777</b>  | <b>0,888</b>  | <b>0,880</b>  | <b>0,904</b>  | <b>0,910</b>  |
|                 | Adjusted p-value                    | 0,362        | 0,203         | <b>0,023</b>  | <b>0,003</b>  | <b>0,004</b>  | <b>0,002</b>  | <b>0,002</b>  |
| hsa_miR_1247    | Pearson correlation coefficient (r) | 0,495        | <b>-0,787</b> | <b>-0,815</b> | -0,426        | -0,385        | -0,404        | -0,664        |
|                 | Adjusted p-value                    | 0,175        | <b>0,012</b>  | <b>0,007</b>  | 0,252         | 0,306         | 0,281         | 0,051         |
| hsa_miR_1248    | Pearson correlation coefficient (r) | -0,004       | 0,489         | 0,211         | -0,184        | -0,274        | -0,222        | -0,006        |
|                 | Adjusted p-value                    | 0,991        | 0,182         | 0,587         | 0,635         | 0,476         | 0,565         | 0,988         |
| hsa_miR_125a_3p | Pearson correlation coefficient (r) | 0,412        | -0,542        | -0,614        | -0,492        | -0,485        | -0,485        | -0,568        |
|                 | Adjusted p-value                    | 0,270        | 0,132         | 0,079         | 0,178         | 0,186         | 0,186         | 0,111         |
| hsa_miR_125a_5p | Pearson correlation coefficient (r) | <b>0,731</b> | <b>-0,910</b> | <b>-0,875</b> | -0,662        | -0,601        | -0,624        | <b>-0,870</b> |
|                 | Adjusted p-value                    | <b>0,025</b> | <b>0,001</b>  | <b>0,002</b>  | 0,052         | 0,087         | 0,072         | <b>0,002</b>  |
| hsa_miR_125b    | Pearson correlation coefficient (r) | <b>0,741</b> | <b>-0,920</b> | <b>-0,927</b> | -0,652        | -0,601        | -0,613        | <b>-0,885</b> |
|                 | Adjusted p-value                    | <b>0,022</b> | <b>0,000</b>  | <b>0,000</b>  | 0,057         | 0,087         | 0,079         | <b>0,002</b>  |
| hsa_miR_125b_1# | Pearson correlation coefficient (r) | 0,658        | <b>-0,838</b> | <b>-0,790</b> | -0,605        | -0,534        | -0,565        | <b>-0,802</b> |
|                 | Adjusted p-value                    | 0,054        | <b>0,005</b>  | <b>0,011</b>  | 0,084         | 0,139         | 0,113         | <b>0,009</b>  |
| hsa_miR_125b_2# | Pearson correlation coefficient (r) | 0,641        | <b>-0,833</b> | <b>-0,914</b> | -0,564        | -0,538        | -0,556        | <b>-0,766</b> |
|                 | Adjusted p-value                    | 0,063        | <b>0,005</b>  | <b>0,001</b>  | 0,114         | 0,135         | 0,120         | <b>0,016</b>  |
| hsa_miR_126     | Pearson correlation coefficient (r) | -0,277       | -0,130        | -0,056        | -0,070        | 0,050         | -0,031        | -0,066        |
|                 | Adjusted p-value                    | 0,470        | 0,738         | 0,886         | 0,858         | 0,898         | 0,937         | 0,867         |
| hsa_miR_126#    | Pearson correlation coefficient (r) | -0,221       | -0,200        | -0,040        | -0,053        | 0,080         | -0,002        | -0,055        |
|                 | Adjusted p-value                    | 0,567        | 0,606         | 0,919         | 0,891         | 0,837         | 0,996         | 0,888         |
| hsa_miR_1260    | Pearson correlation coefficient (r) | -0,347       | 0,499         | 0,542         | 0,506         | 0,397         | 0,484         | 0,557         |
|                 | Adjusted p-value                    | 0,360        | 0,171         | 0,132         | 0,165         | 0,290         | 0,187         | 0,119         |
| hsa_miR_1270    | Pearson correlation coefficient (r) | <b>0,927</b> | <b>-0,840</b> | <b>-0,808</b> | -0,489        | -0,456        | -0,460        | <b>-0,717</b> |
|                 | Adjusted p-value                    | <b>0,000</b> | <b>0,005</b>  | <b>0,008</b>  | 0,182         | 0,217         | 0,213         | <b>0,030</b>  |
| hsa_miR_1271    | Pearson correlation coefficient (r) | 0,110        | -0,449        | <b>-0,848</b> | -0,709        | -0,708        | -0,712        | <b>-0,834</b> |

|                |                                     |              |               |               |        |        |        |               |
|----------------|-------------------------------------|--------------|---------------|---------------|--------|--------|--------|---------------|
|                | Adjusted p-value                    | 0,814        | 0,312         | <b>0,016</b>  | 0,075  | 0,075  | 0,072  | <b>0,020</b>  |
| hsa_miR_127_3p | Pearson correlation coefficient (r) | 0,613        | <b>-0,818</b> | <b>-0,760</b> | -0,453 | -0,369 | -0,402 | <b>-0,679</b> |
|                | Adjusted p-value                    | 0,079        | <b>0,007</b>  | <b>0,018</b>  | 0,221  | 0,329  | 0,284  | <b>0,044</b>  |
| hsa_miR_127_5p | Pearson correlation coefficient (r) | 0,450        | <b>-0,740</b> | -0,621        | -0,120 | -0,042 | -0,063 | -0,400        |
|                | Adjusted p-value                    | 0,225        | <b>0,023</b>  | 0,074         | 0,759  | 0,915  | 0,871  | 0,286         |
| hsa_miR_129#   | Pearson correlation coefficient (r) | <b>0,767</b> | <b>-0,762</b> | <b>-0,736</b> | -0,413 | -0,386 | -0,388 | -0,629        |
|                | Adjusted p-value                    | <b>0,016</b> | <b>0,017</b>  | <b>0,024</b>  | 0,269  | 0,305  | 0,302  | 0,070         |
| hsa_miR_129_3p | Pearson correlation coefficient (r) | 0,574        | -0,613        | -0,640        | -0,469 | -0,456 | -0,441 | -0,635        |
|                | Adjusted p-value                    | 0,106        | 0,079         | 0,063         | 0,203  | 0,218  | 0,235  | 0,066         |
| hsa_miR_129_5p | Pearson correlation coefficient (r) | <b>0,692</b> | <b>-0,728</b> | <b>-0,705</b> | -0,372 | -0,347 | -0,347 | -0,589        |
|                | Adjusted p-value                    | <b>0,039</b> | <b>0,026</b>  | <b>0,034</b>  | 0,324  | 0,361  | 0,361  | 0,095         |
| hsa_miR_1296   | Pearson correlation coefficient (r) | -0,639       | <b>0,891</b>  | <b>0,856</b>  | 0,336  | 0,301  | 0,294  | 0,660         |
|                | Adjusted p-value                    | 0,064        | <b>0,001</b>  | <b>0,003</b>  | 0,377  | 0,431  | 0,442  | 0,053         |
| hsa_miR_130a   | Pearson correlation coefficient (r) | 0,446        | <b>-0,710</b> | <b>-0,697</b> | -0,546 | -0,464 | -0,494 | <b>-0,703</b> |
|                | Adjusted p-value                    | 0,229        | <b>0,032</b>  | <b>0,037</b>  | 0,128  | 0,209  | 0,177  | <b>0,035</b>  |
| hsa_miR_130b   | Pearson correlation coefficient (r) | -0,206       | 0,029         | 0,073         | -0,209 | -0,050 | -0,136 | -0,114        |
|                | Adjusted p-value                    | 0,595        | 0,941         | 0,853         | 0,589  | 0,898  | 0,728  | 0,770         |
| hsa_miR_130b#  | Pearson correlation coefficient (r) | -0,695       | 0,585         | 0,363         | 0,352  | 0,266  | 0,283  | 0,508         |
|                | Adjusted p-value                    | 0,055        | 0,128         | 0,377         | 0,392  | 0,525  | 0,498  | 0,199         |
| hsa_miR_132    | Pearson correlation coefficient (r) | -0,139       | -0,331        | -0,167        | -0,016 | 0,068  | 0,037  | -0,110        |
|                | Adjusted p-value                    | 0,722        | 0,384         | 0,667         | 0,968  | 0,861  | 0,925  | 0,779         |
| hsa_miR_132#   | Pearson correlation coefficient (r) | -0,391       | -0,019        | 0,055         | 0,623  | 0,615  | 0,608  | 0,460         |
|                | Adjusted p-value                    | 0,299        | 0,960         | 0,889         | 0,073  | 0,078  | 0,082  | 0,213         |
| hsa_miR_133a   | Pearson correlation coefficient (r) | -0,281       | 0,229         | -0,222        | -0,448 | -0,497 | -0,495 | -0,329        |
|                | Adjusted p-value                    | 0,464        | 0,553         | 0,566         | 0,227  | 0,173  | 0,175  | 0,388         |
| hsa_miR_133b   | Pearson correlation coefficient (r) | -0,404       | 0,328         | -0,055        | -0,485 | -0,500 | -0,519 | -0,272        |
|                | Adjusted p-value                    | 0,281        | 0,389         | 0,889         | 0,186  | 0,171  | 0,152  | 0,479         |
| hsa_miR_134    | Pearson correlation coefficient (r) | 0,452        | <b>-0,683</b> | <b>-0,692</b> | -0,596 | -0,497 | -0,547 | <b>-0,725</b> |
|                | Adjusted p-value                    | 0,222        | <b>0,043</b>  | <b>0,039</b>  | 0,091  | 0,174  | 0,128  | <b>0,027</b>  |
| hsa_miR_135a   | Pearson correlation coefficient (r) | <b>0,945</b> | <b>-0,803</b> | <b>-0,711</b> | -0,463 | -0,412 | -0,408 | <b>-0,691</b> |
|                | Adjusted p-value                    | <b>0,000</b> | <b>0,009</b>  | <b>0,032</b>  | 0,210  | 0,271  | 0,276  | <b>0,039</b>  |
| hsa_miR_135a#  | Pearson correlation coefficient (r) | 0,061        | -0,141        | -0,004        | 0,119  | 0,142  | 0,164  | -0,022        |
|                | Adjusted p-value                    | 0,886        | 0,739         | 0,993         | 0,779  | 0,738  | 0,697  | 0,959         |

|                |                                     |              |               |               |               |               |               |               |
|----------------|-------------------------------------|--------------|---------------|---------------|---------------|---------------|---------------|---------------|
| hsa_miR_135b   | Pearson correlation coefficient (r) | <b>0,814</b> | <b>-0,917</b> | <b>-0,893</b> | -0,491        | -0,463        | -0,462        | -0,764        |
|                | Adjusted p-value                    | <b>0,008</b> | <b>0,001</b>  | <b>0,001</b>  | 0,179         | 0,209         | 0,210         | 0,017         |
| hsa_miR_136    | Pearson correlation coefficient (r) | 0,558        | <b>-0,748</b> | -0,648        | -0,350        | <b>-0,278</b> | <b>-0,298</b> | <b>-0,569</b> |
|                | Adjusted p-value                    | 0,119        | <b>0,020</b>  | 0,059         | 0,355         | 0,469         | 0,436         | 0,110         |
| hsa_miR_138    | Pearson correlation coefficient (r) | -0,658       | <b>0,772</b>  | <b>0,673</b>  | 0,413         | 0,410         | 0,388         | 0,599         |
|                | Adjusted p-value                    | 0,054        | <b>0,015</b>  | <b>0,047</b>  | 0,270         | 0,273         | 0,302         | 0,088         |
| hsa_miR_139_5p | Pearson correlation coefficient (r) | 0,142        | -0,606        | -0,453        | -0,010        | 0,105         | 0,038         | -0,225        |
|                | Adjusted p-value                    | 0,716        | 0,084         | 0,221         | 0,980         | 0,789         | 0,923         | 0,561         |
| hsa_miR_140_3p | Pearson correlation coefficient (r) | 0,607        | <b>-0,857</b> | <b>-0,881</b> | -0,645        | <b>-0,587</b> | <b>-0,599</b> | <b>-0,849</b> |
|                | Adjusted p-value                    | 0,083        | <b>0,003</b>  | <b>0,002</b>  | 0,061         | 0,097         | 0,088         | <b>0,004</b>  |
| hsa_miR_140_5p | Pearson correlation coefficient (r) | 0,613        | <b>-0,821</b> | -0,638        | -0,521        | <b>-0,460</b> | <b>-0,453</b> | <b>-0,722</b> |
|                | Adjusted p-value                    | 0,106        | <b>0,013</b>  | 0,089         | 0,186         | 0,251         | 0,260         | <b>0,043</b>  |
| hsa_miR_141    | Pearson correlation coefficient (r) | 0,407        | -0,152        | 0,381         | 0,341         | 0,450         | 0,437         | 0,274         |
|                | Adjusted p-value                    | 0,365        | 0,745         | 0,398         | 0,455         | 0,311         | 0,326         | 0,551         |
| hsa_miR_142_3p | Pearson correlation coefficient (r) | 0,499        | -0,540        | -0,477        | -0,551        | <b>-0,502</b> | <b>-0,515</b> | <b>-0,605</b> |
|                | Adjusted p-value                    | 0,171        | 0,133         | 0,194         | 0,125         | 0,168         | 0,156         | 0,085         |
| hsa_miR_142_5p | Pearson correlation coefficient (r) | 0,430        | -0,476        | -0,487        | -0,647        | <b>-0,626</b> | <b>-0,615</b> | <b>-0,682</b> |
|                | Adjusted p-value                    | 0,248        | 0,195         | 0,184         | 0,060         | 0,071         | 0,078         | <b>0,043</b>  |
| hsa_miR_143    | Pearson correlation coefficient (r) | 0,134        | -0,345        | -0,398        | -0,599        | <b>-0,549</b> | <b>-0,566</b> | <b>-0,565</b> |
|                | Adjusted p-value                    | 0,731        | 0,363         | 0,289         | 0,088         | 0,126         | 0,112         | 0,113         |
| hsa_miR_143#   | Pearson correlation coefficient (r) | 0,004        | -0,167        | -0,177        | -0,535        | <b>-0,470</b> | <b>-0,493</b> | <b>-0,432</b> |
|                | Adjusted p-value                    | 0,993        | 0,667         | 0,649         | 0,138         | 0,202         | 0,178         | 0,246         |
| hsa_miR_144    | Pearson correlation coefficient (r) | -0,509       | 0,395         | 0,422         | 0,265         | 0,285         | 0,270         | 0,418         |
|                | Adjusted p-value                    | 0,161        | 0,293         | 0,258         | 0,491         | 0,457         | 0,482         | 0,263         |
| hsa_miR_144#   | Pearson correlation coefficient (r) | -0,479       | 0,310         | 0,479         | 0,425         | 0,533         | 0,468         | 0,526         |
|                | Adjusted p-value                    | 0,192        | 0,417         | 0,192         | 0,255         | 0,140         | 0,204         | 0,146         |
| hsa_miR_145    | Pearson correlation coefficient (r) | 0,199        | -0,554        | -0,647        | <b>-0,701</b> | <b>-0,651</b> | <b>-0,674</b> | <b>-0,749</b> |
|                | Adjusted p-value                    | 0,607        | 0,122         | 0,060         | <b>0,035</b>  | 0,058         | <b>0,046</b>  | <b>0,020</b>  |
| hsa_miR_145#   | Pearson correlation coefficient (r) | 0,418        | -0,651        | -0,608        | -0,580        | -0,513        | -0,534        | <b>-0,670</b> |
|                | Adjusted p-value                    | 0,263        | 0,058         | 0,082         | 0,102         | 0,157         | 0,138         | <b>0,048</b>  |
| hsa_miR_1468   | Pearson correlation coefficient (r) | 0,339        | <b>-0,639</b> | -0,363        | -0,253        | <b>-0,084</b> | <b>-0,159</b> | <b>-0,370</b> |
|                | Adjusted p-value                    | 0,411        | <b>0,088</b>  | 0,377         | 0,546         | 0,843         | 0,707         | 0,368         |
| hsa_miR_146a   | Pearson correlation coefficient (r) | <b>0,724</b> | <b>-0,805</b> | <b>-0,767</b> | -0,570        | -0,536        | -0,537        | <b>-0,769</b> |

|                 |                                     |              |               |               |               |               |               |               |
|-----------------|-------------------------------------|--------------|---------------|---------------|---------------|---------------|---------------|---------------|
|                 | Adjusted p-value                    | <b>0,027</b> | <b>0,009</b>  | <b>0,016</b>  | 0,109         | 0,137         | 0,136         | <b>0,015</b>  |
| hsa_miR_146b_3p | Pearson correlation coefficient (r) | 0,009        | -0,068        | 0,131         | 0,392         | 0,427         | 0,378         | 0,370         |
|                 | Adjusted p-value                    | 0,984        | 0,872         | 0,757         | 0,337         | 0,291         | 0,355         | 0,367         |
| hsa_miR_146b_5p | Pearson correlation coefficient (r) | <b>0,817</b> | <b>-0,761</b> | -0,585        | -0,450        | -0,366        | -0,389        | -0,646        |
|                 | Adjusted p-value                    | <b>0,007</b> | <b>0,017</b>  | 0,098         | 0,224         | 0,332         | 0,300         | 0,060         |
| hsa_miR_147b    | Pearson correlation coefficient (r) | -0,517       | 0,762         | <b>0,946</b>  | 0,718         | 0,717         | 0,711         | <b>0,887</b>  |
|                 | Adjusted p-value                    | 0,294        | 0,078         | <b>0,004</b>  | 0,108         | 0,109         | 0,113         | <b>0,018</b>  |
| hsa_miR_148a    | Pearson correlation coefficient (r) | <b>0,877</b> | <b>-0,858</b> | <b>-0,834</b> | -0,637        | -0,605        | -0,584        | <b>-0,841</b> |
|                 | Adjusted p-value                    | <b>0,004</b> | <b>0,006</b>  | <b>0,010</b>  | 0,089         | 0,112         | 0,129         | <b>0,009</b>  |
| hsa_miR_148a#   | Pearson correlation coefficient (r) | 0,101        | -0,054        | -0,386        | <b>-0,822</b> | <b>-0,842</b> | <b>-0,845</b> | -0,685        |
|                 | Adjusted p-value                    | 0,813        | 0,900         | 0,345         | <b>0,012</b>  | <b>0,009</b>  | <b>0,008</b>  | 0,061         |
| hsa_miR_148b    | Pearson correlation coefficient (r) | <b>0,673</b> | <b>-0,863</b> | <b>-0,760</b> | -0,479        | -0,400        | -0,421        | <b>-0,702</b> |
|                 | Adjusted p-value                    | <b>0,047</b> | <b>0,003</b>  | <b>0,017</b>  | 0,192         | 0,285         | 0,260         | <b>0,035</b>  |
| hsa_miR_149     | Pearson correlation coefficient (r) | 0,620        | -0,571        | -0,697        | -0,630        | -0,619        | -0,627        | <b>-0,758</b> |
|                 | Adjusted p-value                    | 0,075        | 0,108         | 0,037         | 0,069         | 0,075         | 0,071         | <b>0,018</b>  |
| hsa_miR_149#    | Pearson correlation coefficient (r) | -0,435       | 0,591         | 0,620         | 0,414         | 0,398         | 0,376         | 0,568         |
|                 | Adjusted p-value                    | 0,242        | 0,094         | 0,075         | 0,268         | 0,289         | 0,319         | 0,110         |
| hsa_miR_150     | Pearson correlation coefficient (r) | -0,265       | 0,052         | -0,168        | -0,435        | -0,452        | -0,476        | -0,324        |
|                 | Adjusted p-value                    | 0,491        | 0,895         | 0,665         | 0,242         | 0,222         | 0,195         | 0,395         |
| hsa_miR_151_3p  | Pearson correlation coefficient (r) | <b>0,836</b> | <b>-0,869</b> | <b>-0,796</b> | -0,484        | -0,477        | -0,450        | <b>-0,744</b> |
|                 | Adjusted p-value                    | <b>0,005</b> | <b>0,002</b>  | <b>0,010</b>  | 0,187         | 0,195         | 0,225         | <b>0,022</b>  |
| hsa_miR_151_5p  | Pearson correlation coefficient (r) | <b>0,743</b> | <b>-0,868</b> | <b>-0,812</b> | -0,525        | -0,495        | -0,491        | <b>-0,764</b> |
|                 | Adjusted p-value                    | <b>0,022</b> | <b>0,002</b>  | <b>0,008</b>  | 0,147         | 0,176         | 0,179         | <b>0,017</b>  |
| hsa_miR_152     | Pearson correlation coefficient (r) | 0,288        | -0,655        | -0,320        | -0,068        | 0,093         | 0,029         | -0,247        |
|                 | Adjusted p-value                    | 0,452        | 0,055         | 0,402         | 0,863         | 0,812         | 0,941         | 0,522         |
| hsa_miR_153     | Pearson correlation coefficient (r) | -0,341       | 0,203         | 0,609         | 0,514         | 0,665         | 0,588         | 0,567         |
|                 | Adjusted p-value                    | 0,369        | 0,600         | 0,082         | 0,157         | 0,051         | 0,096         | 0,111         |
| hsa_miR_1537    | Pearson correlation coefficient (r) | 0,104        | -0,491        | -0,147        | 0,461         | 0,575         | 0,544         | 0,174         |
|                 | Adjusted p-value                    | 0,789        | 0,179         | 0,705         | 0,211         | 0,105         | 0,130         | 0,655         |
| hsa_miR_154     | Pearson correlation coefficient (r) | 0,644        | <b>-0,845</b> | <b>-0,788</b> | -0,491        | -0,412        | -0,438        | <b>-0,718</b> |
|                 | Adjusted p-value                    | 0,061        | <b>0,004</b>  | <b>0,012</b>  | 0,180         | 0,271         | 0,239         | <b>0,029</b>  |
| hsa_miR_154#    | Pearson correlation coefficient (r) | 0,583        | -0,471        | -0,424        | -0,204        | -0,128        | -0,171        | -0,330        |
|                 | Adjusted p-value                    | 0,100        | 0,201         | 0,255         | 0,598         | 0,742         | 0,660         | 0,385         |

|                 |                                     |              |               |               |              |              |              |               |
|-----------------|-------------------------------------|--------------|---------------|---------------|--------------|--------------|--------------|---------------|
| hsa_miR_155     | Pearson correlation coefficient (r) | 0,192        | -0,394        | -0,130        | -0,149       | -0,122       | -0,120       | -0,199        |
|                 | Adjusted p-value                    | 0,620        | 0,294         | 0,739         | 0,703        | 0,754        | 0,758        | 0,609         |
| hsa_miR_15a     | Pearson correlation coefficient (r) | 0,378        | -0,655        | -0,344        | -0,212       | -0,036       | -0,100       | -0,359        |
|                 | Adjusted p-value                    | 0,315        | 0,055         | 0,364         | 0,583        | 0,928        | 0,797        | 0,343         |
| hsa_miR_15a#    | Pearson correlation coefficient (r) | 0,232        | -0,579        | -0,634        | 0,331        | 0,338        | 0,343        | -0,031        |
|                 | Adjusted p-value                    | 0,658        | 0,228         | 0,177         | 0,521        | 0,512        | 0,505        | 0,953         |
| hsa_miR_15b     | Pearson correlation coefficient (r) | -0,287       | 0,312         | 0,631         | <b>0,779</b> | <b>0,833</b> | <b>0,805</b> | <b>0,766</b>  |
|                 | Adjusted p-value                    | 0,453        | 0,414         | 0,068         | <b>0,013</b> | <b>0,005</b> | <b>0,009</b> | <b>0,016</b>  |
| hsa_miR_15b#    | Pearson correlation coefficient (r) | 0,506        | 0,059         | 0,261         | -0,062       | -0,026       | 0,003        | -0,050        |
|                 | Adjusted p-value                    | 0,201        | 0,889         | 0,533         | 0,883        | 0,951        | 0,995        | 0,907         |
| hsa_miR_16      | Pearson correlation coefficient (r) | -0,441       | 0,420         | 0,703         | 0,483        | 0,614        | 0,559        | 0,602         |
|                 | Adjusted p-value                    | 0,235        | 0,260         | 0,035         | 0,187        | 0,079        | 0,118        | 0,086         |
| hsa_miR_16_2#   | Pearson correlation coefficient (r) | -0,651       | 0,590         | <b>0,825</b>  | <b>0,856</b> | <b>0,885</b> | <b>0,879</b> | <b>0,924</b>  |
|                 | Adjusted p-value                    | 0,057        | 0,094         | <b>0,006</b>  | <b>0,003</b> | <b>0,002</b> | <b>0,002</b> | <b>0,000</b>  |
| hsa_miR_17      | Pearson correlation coefficient (r) | <b>0,703</b> | <b>-0,786</b> | -0,570        | -0,119       | -0,066       | -0,061       | -0,415        |
|                 | Adjusted p-value                    | <b>0,035</b> | <b>0,012</b>  | 0,109         | 0,761        | 0,866        | 0,875        | 0,267         |
| hsa_miR_17#     | Pearson correlation coefficient (r) | <b>0,832</b> | <b>-0,850</b> | <b>-0,742</b> | -0,504       | -0,488       | -0,455       | <b>-0,752</b> |
|                 | Adjusted p-value                    | <b>0,005</b> | <b>0,004</b>  | <b>0,022</b>  | 0,167        | 0,183        | 0,218        | <b>0,019</b>  |
| hsa_miR_181a    | Pearson correlation coefficient (r) | <b>0,874</b> | <b>-0,902</b> | <b>-0,887</b> | -0,595       | -0,550       | -0,558       | <b>-0,834</b> |
|                 | Adjusted p-value                    | <b>0,002</b> | <b>0,001</b>  | <b>0,001</b>  | 0,091        | 0,125        | 0,118        | <b>0,005</b>  |
| hsa_miR_181a#   | Pearson correlation coefficient (r) | 0,471        | -0,408        | -0,623        | -0,460       | -0,436       | -0,461       | -0,575        |
|                 | Adjusted p-value                    | 0,200        | 0,275         | 0,073         | 0,213        | 0,241        | 0,211        | 0,105         |
| hsa_miR_181a_2# | Pearson correlation coefficient (r) | 0,651        | -0,643        | -0,685        | -0,434       | -0,416       | -0,435       | -0,567        |
|                 | Adjusted p-value                    | 0,080        | 0,086         | 0,061         | 0,282        | 0,305        | 0,281        | 0,142         |
| hsa_miR_181b    | Pearson correlation coefficient (r) | <b>0,804</b> | <b>-0,884</b> | <b>-0,916</b> | -0,542       | -0,505       | -0,513       | <b>-0,803</b> |
|                 | Adjusted p-value                    | <b>0,009</b> | <b>0,002</b>  | <b>0,001</b>  | 0,132        | 0,166        | 0,158        | <b>0,009</b>  |
| hsa_miR_181c    | Pearson correlation coefficient (r) | -0,103       | 0,323         | 0,019         | -0,456       | -0,483       | -0,454       | -0,307        |
|                 | Adjusted p-value                    | 0,791        | 0,397         | 0,962         | 0,218        | 0,188        | 0,220        | 0,421         |
| hsa_miR_181c#   | Pearson correlation coefficient (r) | -0,652       | <b>0,760</b>  | 0,492         | 0,075        | -0,017       | -0,018       | 0,389         |
|                 | Adjusted p-value                    | 0,057        | <b>0,017</b>  | 0,179         | 0,847        | 0,966        | 0,963        | 0,300         |
| hsa_miR_181d    | Pearson correlation coefficient (r) | <b>0,834</b> | <b>-0,707</b> | <b>-0,746</b> | -0,551       | -0,531       | -0,524       | <b>-0,720</b> |
|                 | Adjusted p-value                    | <b>0,005</b> | <b>0,033</b>  | <b>0,021</b>  | 0,124        | 0,142        | 0,147        | <b>0,029</b>  |
| hsa_miR_182     | Pearson correlation coefficient (r) | -0,490       | 0,408         | 0,714         | <b>0,919</b> | <b>0,970</b> | <b>0,951</b> | <b>0,908</b>  |

|                 |                                     |              |               |               |              |              |              |               |
|-----------------|-------------------------------------|--------------|---------------|---------------|--------------|--------------|--------------|---------------|
|                 | Adjusted p-value                    | 0,180        | 0,276         | 0,031         | <b>0,000</b> | <b>0,000</b> | <b>0,000</b> | <b>0,001</b>  |
| hsa_miR_182#    | Pearson correlation coefficient (r) | -0,569       | 0,468         | 0,538         | <b>0,884</b> | 0,861        | 0,835        | <b>0,955</b>  |
|                 | Adjusted p-value                    | 0,317        | 0,426         | 0,349         | <b>0,047</b> | 0,061        | 0,078        | <b>0,011</b>  |
| hsa_miR_185     | Pearson correlation coefficient (r) | -0,194       | 0,091         | 0,198         | 0,103        | 0,144        | 0,143        | 0,159         |
|                 | Adjusted p-value                    | 0,617        | 0,817         | 0,610         | 0,792        | 0,711        | 0,714        | 0,682         |
| hsa_miR_186     | Pearson correlation coefficient (r) | <b>0,684</b> | <b>-0,921</b> | <b>-0,932</b> | -0,598       | -0,560       | -0,564       | <b>-0,838</b> |
|                 | Adjusted p-value                    | <b>0,042</b> | <b>0,000</b>  | <b>0,000</b>  | 0,089        | 0,117        | 0,114        | <b>0,005</b>  |
| hsa_miR_187     | Pearson correlation coefficient (r) | <b>0,744</b> | <b>-0,804</b> | <b>-0,803</b> | -0,441       | -0,415       | -0,411       | <b>-0,694</b> |
|                 | Adjusted p-value                    | <b>0,022</b> | <b>0,009</b>  | <b>0,009</b>  | 0,235        | 0,266        | 0,272        | <b>0,038</b>  |
| hsa_miR_187#    | Pearson correlation coefficient (r) | 0,140        | -0,277        | -0,201        | -0,213       | -0,195       | -0,201       | -0,238        |
|                 | Adjusted p-value                    | 0,765        | 0,548         | 0,665         | 0,647        | 0,675        | 0,665        | 0,607         |
| hsa_miR_188_5p  | Pearson correlation coefficient (r) | 0,177        | -0,221        | -0,607        | -0,427       | -0,457       | -0,473       | -0,480        |
|                 | Adjusted p-value                    | 0,648        | 0,567         | 0,083         | 0,252        | 0,217        | 0,198        | 0,191         |
| hsa_miR_18a     | Pearson correlation coefficient (r) | -0,434       | <b>0,718</b>  | <b>0,716</b>  | 0,458        | 0,413        | 0,393        | 0,691         |
|                 | Adjusted p-value                    | 0,283        | <b>0,045</b>  | <b>0,046</b>  | 0,254        | 0,309        | 0,336        | 0,058         |
| hsa_miR_18a#    | Pearson correlation coefficient (r) | 0,368        | 0,170         | 0,106         | 0,087        | 0,010        | 0,060        | 0,071         |
|                 | Adjusted p-value                    | 0,330        | 0,662         | 0,786         | 0,824        | 0,980        | 0,879        | 0,856         |
| hsa_miR_18b     | Pearson correlation coefficient (r) | -0,294       | 0,314         | 0,666         | 0,427        | 0,553        | 0,479        | 0,543         |
|                 | Adjusted p-value                    | 0,442        | 0,410         | 0,050         | 0,252        | 0,123        | 0,192        | 0,131         |
| hsa_miR_190     | Pearson correlation coefficient (r) | <b>0,740</b> | <b>-0,965</b> | <b>-0,768</b> | -0,258       | -0,206       | -0,218       | -0,555        |
|                 | Adjusted p-value                    | <b>0,023</b> | <b>0,000</b>  | <b>0,016</b>  | 0,503        | 0,594        | 0,574        | 0,121         |
| hsa_miR_1908    | Pearson correlation coefficient (r) | 0,507        | <b>-0,720</b> | -0,687        | -0,399       | -0,403       | -0,379       | -0,584        |
|                 | Adjusted p-value                    | 0,199        | <b>0,044</b>  | 0,060         | 0,327        | 0,322        | 0,355        | 0,128         |
| hsa_miR_191     | Pearson correlation coefficient (r) | <b>0,852</b> | <b>-0,850</b> | -0,551        | -0,153       | -0,059       | -0,074       | -0,435        |
|                 | Adjusted p-value                    | <b>0,004</b> | <b>0,004</b>  | 0,124         | 0,695        | 0,880        | 0,849        | 0,242         |
| hsa_miR_191_dup | Pearson correlation coefficient (r) | <b>0,799</b> | <b>-0,854</b> | -0,537        | -0,348       | -0,243       | -0,261       | -0,580        |
|                 | Adjusted p-value                    | <b>0,010</b> | <b>0,003</b>  | 0,136         | 0,359        | 0,528        | 0,498        | 0,102         |
| hsa_miR_191#    | Pearson correlation coefficient (r) | -0,470       | <b>0,754</b>  | <b>0,826</b>  | 0,049        | 0,107        | 0,080        | 0,380         |
|                 | Adjusted p-value                    | 0,202        | <b>0,019</b>  | <b>0,006</b>  | 0,900        | 0,783        | 0,838        | 0,313         |
| hsa_miR_1911#   | Pearson correlation coefficient (r) | <b>0,890</b> | <b>-0,719</b> | <b>-0,710</b> | -0,409       | -0,382       | -0,387       | -0,610        |
|                 | Adjusted p-value                    | <b>0,001</b> | <b>0,029</b>  | <b>0,032</b>  | 0,274        | 0,310        | 0,304        | 0,081         |
| hsa_miR_192     | Pearson correlation coefficient (r) | -0,606       | <b>0,672</b>  | <b>0,764</b>  | 0,343        | 0,438        | 0,380        | 0,577         |
|                 | Adjusted p-value                    | 0,084        | <b>0,047</b>  | <b>0,017</b>  | 0,366        | 0,238        | 0,313        | 0,104         |



|                 |                                     |              |               |               |              |              |              |               |
|-----------------|-------------------------------------|--------------|---------------|---------------|--------------|--------------|--------------|---------------|
| hsa_miR_193a_3p | Pearson correlation coefficient (r) | 0,489        | <b>-0,696</b> | <b>-0,742</b> | -0,469       | -0,429       | -0,433       | -0,667        |
|                 | Adjusted p-value                    | 0,182        | <b>0,037</b>  | <b>0,022</b>  | 0,202        | 0,249        | 0,244        | 0,050         |
| hsa_miR_193a_5p | Pearson correlation coefficient (r) | 0,506        | <b>-0,769</b> | <b>-0,713</b> | -0,512       | -0,419       | -0,456       | <b>-0,685</b> |
|                 | Adjusted p-value                    | 0,165        | <b>0,016</b>  | <b>0,031</b>  | 0,158        | 0,262        | 0,218        | <b>0,042</b>  |
| hsa_miR_193b    | Pearson correlation coefficient (r) | <b>0,895</b> | <b>-0,930</b> | <b>-0,885</b> | -0,557       | -0,503       | -0,513       | <b>-0,812</b> |
|                 | Adjusted p-value                    | <b>0,001</b> | <b>0,000</b>  | <b>0,002</b>  | 0,119        | 0,167        | 0,158        | <b>0,008</b>  |
| hsa_miR_193b#   | Pearson correlation coefficient (r) | <b>0,709</b> | <b>-0,870</b> | <b>-0,899</b> | -0,381       | -0,357       | -0,340       | <b>-0,722</b> |
|                 | Adjusted p-value                    | <b>0,049</b> | <b>0,005</b>  | <b>0,002</b>  | 0,352        | 0,386        | 0,409        | <b>0,043</b>  |
| hsa_miR_194     | Pearson correlation coefficient (r) | -0,407       | 0,398         | 0,599         | <b>0,781</b> | <b>0,839</b> | <b>0,828</b> | <b>0,750</b>  |
|                 | Adjusted p-value                    | 0,278        | 0,289         | 0,088         | <b>0,013</b> | <b>0,005</b> | <b>0,006</b> | <b>0,020</b>  |
| hsa_miR_195     | Pearson correlation coefficient (r) | <b>0,709</b> | <b>-0,842</b> | <b>-0,685</b> | -0,430       | -0,315       | -0,354       | -0,645        |
|                 | Adjusted p-value                    | <b>0,032</b> | <b>0,004</b>  | <b>0,042</b>  | 0,248        | 0,409        | 0,350        | 0,061         |
| hsa_miR_195#    | Pearson correlation coefficient (r) | 0,285        | -0,578        | -0,698        | -0,549       | -0,457       | -0,507       | -0,658        |
|                 | Adjusted p-value                    | 0,495        | 0,133         | 0,054         | 0,159        | 0,255        | 0,200        | 0,076         |
| hsa_miR_196a    | Pearson correlation coefficient (r) | -0,255       | 0,295         | 0,215         | -0,314       | -0,291       | -0,292       | -0,100        |
|                 | Adjusted p-value                    | 0,507        | 0,441         | 0,579         | 0,411        | 0,448        | 0,446        | 0,797         |
| hsa_miR_196b    | Pearson correlation coefficient (r) | -0,273       | 0,325         | 0,142         | -0,365       | -0,352       | -0,354       | -0,164        |
|                 | Adjusted p-value                    | 0,554        | 0,477         | 0,761         | 0,420        | 0,438        | 0,436        | 0,725         |
| hsa_miR_197     | Pearson correlation coefficient (r) | <b>0,831</b> | <b>-0,885</b> | <b>-0,836</b> | -0,620       | -0,584       | -0,592       | <b>-0,828</b> |
|                 | Adjusted p-value                    | <b>0,006</b> | <b>0,002</b>  | <b>0,005</b>  | 0,075        | 0,099        | 0,093        | <b>0,006</b>  |
| hsa_miR_1974    | Pearson correlation coefficient (r) | 0,139        | -0,072        | 0,073         | 0,273        | 0,288        | 0,330        | 0,099         |
|                 | Adjusted p-value                    | 0,721        | 0,853         | 0,852         | 0,477        | 0,453        | 0,385        | 0,801         |
| hsa_miR_1979    | Pearson correlation coefficient (r) | 0,593        | <b>-0,844</b> | <b>-0,701</b> | -0,450       | -0,365       | -0,385       | <b>-0,691</b> |
|                 | Adjusted p-value                    | 0,092        | <b>0,004</b>  | <b>0,035</b>  | 0,224        | 0,335        | 0,306        | <b>0,039</b>  |
| hsa_miR_199a_3p | Pearson correlation coefficient (r) | 0,555        | <b>-0,835</b> | <b>-0,796</b> | -0,477       | -0,415       | -0,436       | <b>-0,699</b> |
|                 | Adjusted p-value                    | 0,121        | <b>0,005</b>  | <b>0,010</b>  | 0,195        | 0,266        | 0,240        | <b>0,036</b>  |
| hsa_miR_199a_5p | Pearson correlation coefficient (r) | 0,517        | <b>-0,791</b> | <b>-0,818</b> | -0,595       | -0,540       | -0,558       | <b>-0,785</b> |
|                 | Adjusted p-value                    | 0,154        | <b>0,011</b>  | <b>0,007</b>  | 0,091        | 0,134        | 0,118        | <b>0,012</b>  |
| hsa_miR_199b_5p | Pearson correlation coefficient (r) | 0,356        | <b>-0,710</b> | -0,484        | -0,296       | -0,174       | -0,216       | -0,481        |
|                 | Adjusted p-value                    | 0,347        | <b>0,032</b>  | 0,187         | 0,440        | 0,654        | 0,577        | 0,189         |
| hsa_miR_19a     | Pearson correlation coefficient (r) | <b>0,830</b> | <b>-0,723</b> | -0,522        | -0,327       | -0,276       | -0,252       | -0,566        |
|                 | Adjusted p-value                    | <b>0,006</b> | <b>0,028</b>  | 0,149         | 0,391        | 0,472        | 0,514        | 0,113         |
| hsa_miR_19b     | Pearson correlation coefficient (r) | <b>0,720</b> | <b>-0,911</b> | <b>-0,686</b> | -0,441       | -0,329       | -0,350       | <b>-0,693</b> |

|                |                                     |              |               |               |               |               |               |               |
|----------------|-------------------------------------|--------------|---------------|---------------|---------------|---------------|---------------|---------------|
|                | Adjusted p-value                    | <b>0,029</b> | <b>0,001</b>  | <b>0,041</b>  | 0,235         | 0,387         | 0,356         | <b>0,038</b>  |
| hsa_miR_19b_1# | Pearson correlation coefficient (r) | 0,094        | 0,015         | -0,025        | 0,309         | 0,291         | 0,308         | 0,152         |
|                | Adjusted p-value                    | 0,825        | 0,972         | 0,953         | 0,456         | 0,485         | 0,458         | 0,719         |
| hsa_miR_200a   | Pearson correlation coefficient (r) | -0,300       | 0,119         | 0,251         | 0,312         | 0,432         | 0,343         | 0,338         |
|                | Adjusted p-value                    | 0,433        | 0,760         | 0,514         | 0,413         | 0,246         | 0,367         | 0,374         |
| hsa_miR_200b   | Pearson correlation coefficient (r) | -0,442       | 0,073         | 0,213         | 0,406         | 0,536         | 0,487         | 0,331         |
|                | Adjusted p-value                    | 0,380        | 0,890         | 0,686         | 0,424         | 0,273         | 0,328         | 0,521         |
| hsa_miR_202    | Pearson correlation coefficient (r) | <b>0,748</b> | <b>-0,852</b> | <b>-0,844</b> | -0,547        | -0,526        | -0,520        | <b>-0,800</b> |
|                | Adjusted p-value                    | <b>0,033</b> | <b>0,007</b>  | <b>0,008</b>  | 0,161         | 0,180         | 0,186         | <b>0,017</b>  |
| hsa_miR_202#   | Pearson correlation coefficient (r) | <b>0,813</b> | <b>-0,689</b> | <b>-0,729</b> | <b>-0,861</b> | <b>-0,800</b> | <b>-0,814</b> | <b>-0,945</b> |
|                | Adjusted p-value                    | <b>0,008</b> | <b>0,040</b>  | <b>0,026</b>  | <b>0,003</b>  | <b>0,010</b>  | <b>0,008</b>  | <b>0,000</b>  |
| hsa_miR_204    | Pearson correlation coefficient (r) | <b>0,774</b> | <b>-0,824</b> | <b>-0,857</b> | -0,567        | -0,546        | -0,539        | <b>-0,803</b> |
|                | Adjusted p-value                    | <b>0,014</b> | <b>0,006</b>  | <b>0,003</b>  | 0,112         | 0,128         | 0,135         | <b>0,009</b>  |
| hsa_miR_205    | Pearson correlation coefficient (r) | -0,455       | <b>0,828</b>  | <b>0,956</b>  | 0,301         | 0,293         | 0,297         | 0,584         |
|                | Adjusted p-value                    | 0,305        | <b>0,021</b>  | <b>0,001</b>  | 0,512         | 0,524         | 0,518         | 0,169         |
| hsa_miR_20a    | Pearson correlation coefficient (r) | 0,378        | -0,371        | 0,025         | -0,031        | 0,138         | 0,087         | -0,127        |
|                | Adjusted p-value                    | 0,316        | 0,325         | 0,949         | 0,937         | 0,722         | 0,823         | 0,745         |
| hsa_miR_20a#   | Pearson correlation coefficient (r) | <b>0,831</b> | <b>-0,785</b> | <b>-0,699</b> | -0,664        | -0,576        | -0,602        | <b>-0,819</b> |
|                | Adjusted p-value                    | <b>0,006</b> | <b>0,012</b>  | <b>0,036</b>  | 0,051         | 0,104         | 0,086         | <b>0,007</b>  |
| hsa_miR_20b    | Pearson correlation coefficient (r) | -0,502       | <b>0,861</b>  | <b>0,910</b>  | 0,378         | 0,362         | 0,379         | 0,598         |
|                | Adjusted p-value                    | 0,204        | <b>0,006</b>  | <b>0,002</b>  | 0,356         | 0,379         | 0,355         | 0,118         |
| hsa_miR_21     | Pearson correlation coefficient (r) | <b>0,718</b> | <b>-0,830</b> | <b>-0,738</b> | -0,626        | -0,536        | -0,551        | <b>-0,805</b> |
|                | Adjusted p-value                    | <b>0,029</b> | <b>0,006</b>  | <b>0,023</b>  | 0,071         | 0,137         | 0,124         | <b>0,009</b>  |
| hsa_miR_21#    | Pearson correlation coefficient (r) | 0,448        | <b>-0,798</b> | <b>-0,879</b> | -0,542        | -0,555        | -0,549        | <b>-0,745</b> |
|                | Adjusted p-value                    | 0,226        | <b>0,010</b>  | <b>0,002</b>  | 0,131         | 0,121         | 0,126         | <b>0,021</b>  |
| hsa_miR_210    | Pearson correlation coefficient (r) | <b>0,710</b> | <b>-0,710</b> | <b>-0,806</b> | <b>-0,811</b> | <b>-0,788</b> | <b>-0,793</b> | <b>-0,928</b> |
|                | Adjusted p-value                    | <b>0,032</b> | <b>0,032</b>  | <b>0,009</b>  | <b>0,008</b>  | <b>0,012</b>  | <b>0,011</b>  | <b>0,000</b>  |
| hsa_miR_212    | Pearson correlation coefficient (r) | -0,170       | -0,356        | -0,305        | 0,057         | 0,059         | 0,063         | -0,088        |
|                | Adjusted p-value                    | 0,688        | 0,387         | 0,463         | 0,894         | 0,889         | 0,883         | 0,837         |
| hsa_miR_214    | Pearson correlation coefficient (r) | 0,582        | <b>-0,842</b> | <b>-0,880</b> | -0,554        | -0,504        | -0,526        | <b>-0,775</b> |
|                | Adjusted p-value                    | 0,100        | <b>0,004</b>  | <b>0,002</b>  | 0,122         | 0,167         | 0,145         | <b>0,014</b>  |
| hsa_miR_214#   | Pearson correlation coefficient (r) | 0,459        | <b>-0,761</b> | <b>-0,810</b> | -0,521        | -0,482        | -0,497        | <b>-0,714</b> |
|                | Adjusted p-value                    | 0,214        | <b>0,017</b>  | <b>0,008</b>  | 0,150         | 0,189         | 0,173         | <b>0,031</b>  |

|                |                                     |               |               |               |               |               |               |               |
|----------------|-------------------------------------|---------------|---------------|---------------|---------------|---------------|---------------|---------------|
| hsa_miR_215    | Pearson correlation coefficient (r) | <b>-0,719</b> | <b>0,779</b>  | <b>0,871</b>  | <b>0,733</b>  | <b>0,738</b>  | <b>0,744</b>  | <b>0,866</b>  |
|                | Adjusted p-value                    | <b>0,029</b>  | <b>0,013</b>  | <b>0,002</b>  | <b>0,025</b>  | <b>0,023</b>  | <b>0,022</b>  | <b>0,003</b>  |
| hsa_miR_216a   | Pearson correlation coefficient (r) | -0,645        | <b>0,874</b>  | <b>0,890</b>  | 0,699         | 0,673         | 0,678         | <b>0,884</b>  |
|                | Adjusted p-value                    | 0,084         | <b>0,004</b>  | <b>0,003</b>  | 0,054         | 0,067         | 0,065         | <b>0,004</b>  |
| hsa_miR_218    | Pearson correlation coefficient (r) | 0,344         | -0,466        | -0,121        | -0,440        | -0,242        | -0,321        | -0,434        |
|                | Adjusted p-value                    | 0,403         | 0,244         | 0,775         | 0,275         | 0,563         | 0,438         | 0,282         |
| hsa_miR_219_5p | Pearson correlation coefficient (r) | 0,520         | <b>-0,906</b> | <b>-0,754</b> | -0,100        | -0,053        | -0,061        | -0,436        |
|                | Adjusted p-value                    | 0,151         | <b>0,001</b>  | <b>0,019</b>  | 0,798         | 0,892         | 0,875         | 0,241         |
| hsa_miR_22     | Pearson correlation coefficient (r) | <b>0,753</b>  | <b>-0,915</b> | <b>-0,866</b> | -0,548        | -0,485        | -0,496        | <b>-0,794</b> |
|                | Adjusted p-value                    | <b>0,019</b>  | <b>0,001</b>  | <b>0,003</b>  | 0,127         | 0,186         | 0,174         | <b>0,011</b>  |
| hsa_miR_22#    | Pearson correlation coefficient (r) | <b>0,675</b>  | <b>-0,914</b> | <b>-0,770</b> | -0,441        | -0,329        | -0,369        | <b>-0,677</b> |
|                | Adjusted p-value                    | <b>0,046</b>  | <b>0,001</b>  | <b>0,015</b>  | 0,235         | 0,387         | 0,329         | <b>0,045</b>  |
| hsa_miR_221    | Pearson correlation coefficient (r) | 0,298         | -0,486        | -0,620        | -0,616        | -0,607        | -0,606        | <b>-0,668</b> |
|                | Adjusted p-value                    | 0,435         | 0,185         | 0,075         | 0,077         | 0,083         | 0,084         | <b>0,049</b>  |
| hsa_miR_222    | Pearson correlation coefficient (r) | -0,165        | 0,073         | -0,095        | -0,306        | -0,352        | -0,341        | -0,173        |
|                | Adjusted p-value                    | 0,671         | 0,851         | 0,808         | 0,424         | 0,352         | 0,369         | 0,655         |
| hsa_miR_223    | Pearson correlation coefficient (r) | <b>0,690</b>  | <b>-0,669</b> | <b>-0,702</b> | -0,631        | -0,597        | -0,601        | <b>-0,750</b> |
|                | Adjusted p-value                    | <b>0,040</b>  | <b>0,049</b>  | <b>0,035</b>  | 0,068         | 0,089         | 0,087         | <b>0,020</b>  |
| hsa_miR_23a    | Pearson correlation coefficient (r) | 0,504         | <b>-0,845</b> | <b>-0,851</b> | -0,595        | -0,532        | -0,558        | <b>-0,788</b> |
|                | Adjusted p-value                    | 0,167         | <b>0,004</b>  | <b>0,004</b>  | 0,091         | 0,140         | 0,118         | <b>0,012</b>  |
| hsa_miR_23a#   | Pearson correlation coefficient (r) | -0,504        | 0,307         | 0,404         | <b>0,917</b>  | <b>0,815</b>  | <b>0,854</b>  | <b>0,844</b>  |
|                | Adjusted p-value                    | 0,203         | 0,459         | 0,321         | <b>0,001</b>  | <b>0,014</b>  | <b>0,007</b>  | <b>0,008</b>  |
| hsa_miR_23b    | Pearson correlation coefficient (r) | 0,299         | <b>-0,713</b> | -0,644        | -0,563        | -0,464        | -0,511        | <b>-0,677</b> |
|                | Adjusted p-value                    | 0,434         | <b>0,031</b>  | 0,061         | 0,115         | 0,208         | 0,160         | <b>0,045</b>  |
| hsa_miR_24     | Pearson correlation coefficient (r) | 0,450         | <b>-0,771</b> | <b>-0,763</b> | -0,647        | -0,562        | -0,597        | <b>-0,788</b> |
|                | Adjusted p-value                    | 0,225         | <b>0,015</b>  | <b>0,017</b>  | 0,060         | 0,115         | 0,090         | <b>0,012</b>  |
| hsa_miR_24_1#  | Pearson correlation coefficient (r) | -0,137        | -0,091        | -0,331        | -0,242        | -0,177        | -0,258        | -0,203        |
|                | Adjusted p-value                    | 0,747         | 0,830         | 0,424         | 0,564         | 0,675         | 0,537         | 0,630         |
| hsa_miR_24_2#  | Pearson correlation coefficient (r) | 0,123         | -0,323        | -0,470        | -0,612        | -0,639        | -0,629        | -0,593        |
|                | Adjusted p-value                    | 0,771         | 0,435         | 0,240         | 0,107         | 0,088         | 0,095         | 0,121         |
| hsa_miR_25     | Pearson correlation coefficient (r) | -0,226        | -0,102        | 0,343         | 0,463         | 0,619         | 0,550         | 0,416         |
|                | Adjusted p-value                    | 0,558         | 0,795         | 0,367         | 0,209         | 0,076         | 0,125         | 0,265         |
| hsa_miR_26a    | Pearson correlation coefficient (r) | <b>0,758</b>  | <b>-0,801</b> | <b>-0,855</b> | <b>-0,738</b> | <b>-0,692</b> | <b>-0,697</b> | <b>-0,922</b> |

|                |                                     |              |               |               |               |               |               |               |
|----------------|-------------------------------------|--------------|---------------|---------------|---------------|---------------|---------------|---------------|
|                | Adjusted p-value                    | <b>0,018</b> | <b>0,009</b>  | <b>0,003</b>  | <b>0,023</b>  | <b>0,039</b>  | <b>0,037</b>  | <b>0,000</b>  |
| hsa_miR_26a_1# | Pearson correlation coefficient (r) | -0,202       | 0,194         | 0,477         | 0,575         | 0,669         | 0,633         | 0,522         |
|                | Adjusted p-value                    | 0,631        | 0,645         | 0,232         | 0,136         | 0,070         | 0,092         | 0,184         |
| hsa_miR_26a_2# | Pearson correlation coefficient (r) | 0,401        | -0,487        | -0,578        | <b>-0,751</b> | <b>-0,715</b> | <b>-0,721</b> | <b>-0,768</b> |
|                | Adjusted p-value                    | 0,285        | 0,184         | 0,103         | <b>0,020</b>  | <b>0,030</b>  | <b>0,028</b>  | <b>0,016</b>  |
| hsa_miR_26b    | Pearson correlation coefficient (r) | 0,622        | <b>-0,777</b> | -0,585        | -0,327        | -0,208        | -0,242        | -0,544        |
|                | Adjusted p-value                    | 0,074        | <b>0,014</b>  | 0,098         | 0,390         | 0,591         | 0,530         | 0,130         |
| hsa_miR_26b#   | Pearson correlation coefficient (r) | 0,080        | -0,667        | -0,736        | -0,063        | -0,048        | -0,047        | -0,350        |
|                | Adjusted p-value                    | 0,865        | 0,101         | 0,059         | 0,893         | 0,919         | 0,920         | 0,441         |
| hsa_miR_27a    | Pearson correlation coefficient (r) | 0,552        | <b>-0,804</b> | <b>-0,703</b> | -0,582        | -0,483        | -0,514        | <b>-0,744</b> |
|                | Adjusted p-value                    | 0,123        | <b>0,009</b>  | <b>0,035</b>  | 0,100         | 0,188         | 0,157         | <b>0,022</b>  |
| hsa_miR_27b    | Pearson correlation coefficient (r) | 0,444        | <b>-0,744</b> | -0,635        | -0,571        | -0,470        | -0,505        | <b>-0,702</b> |
|                | Adjusted p-value                    | 0,231        | <b>0,021</b>  | 0,066         | 0,108         | 0,201         | 0,166         | <b>0,035</b>  |
| hsa_miR_27b#   | Pearson correlation coefficient (r) | 0,544        | -0,207        | -0,154        | <b>-0,805</b> | <b>-0,759</b> | <b>-0,786</b> | -0,628        |
|                | Adjusted p-value                    | 0,207        | 0,657         | 0,742         | <b>0,029</b>  | <b>0,048</b>  | <b>0,036</b>  | 0,131         |
| hsa_miR_28_3p  | Pearson correlation coefficient (r) | 0,609        | <b>-0,891</b> | <b>-0,775</b> | -0,518        | -0,449        | -0,482        | <b>-0,708</b> |
|                | Adjusted p-value                    | 0,082        | <b>0,001</b>  | <b>0,014</b>  | 0,153         | 0,225         | 0,188         | <b>0,033</b>  |
| hsa_miR_28_5p  | Pearson correlation coefficient (r) | <b>0,719</b> | <b>-0,824</b> | <b>-0,724</b> | -0,463        | -0,354        | -0,395        | -0,661        |
|                | Adjusted p-value                    | <b>0,029</b> | <b>0,006</b>  | <b>0,027</b>  | 0,209         | 0,350         | 0,293         | 0,053         |
| hsa_miR_296_3p | Pearson correlation coefficient (r) | -0,442       | 0,401         | <b>0,689</b>  | <b>0,809</b>  | <b>0,868</b>  | <b>0,834</b>  | <b>0,820</b>  |
|                | Adjusted p-value                    | 0,233        | 0,285         | <b>0,040</b>  | <b>0,008</b>  | <b>0,002</b>  | <b>0,005</b>  | <b>0,007</b>  |
| hsa_miR_296_5p | Pearson correlation coefficient (r) | -0,539       | <b>0,683</b>  | <b>0,852</b>  | <b>0,754</b>  | <b>0,733</b>  | <b>0,733</b>  | <b>0,907</b>  |
|                | Adjusted p-value                    | 0,134        | <b>0,043</b>  | <b>0,004</b>  | <b>0,019</b>  | <b>0,025</b>  | <b>0,025</b>  | <b>0,001</b>  |
| hsa_miR_299_3p | Pearson correlation coefficient (r) | 0,440        | -0,670        | <b>-0,756</b> | -0,424        | -0,422        | -0,438        | -0,565        |
|                | Adjusted p-value                    | 0,323        | 0,099         | <b>0,049</b>  | 0,343         | 0,345         | 0,326         | 0,187         |
| hsa_miR_299_5p | Pearson correlation coefficient (r) | 0,524        | <b>-0,767</b> | <b>-0,808</b> | -0,588        | -0,524        | -0,547        | <b>-0,776</b> |
|                | Adjusted p-value                    | 0,147        | <b>0,016</b>  | <b>0,008</b>  | 0,096         | 0,148         | 0,127         | <b>0,014</b>  |
| hsa_miR_29a    | Pearson correlation coefficient (r) | <b>0,717</b> | <b>-0,904</b> | <b>-0,802</b> | -0,485        | -0,397        | -0,425        | <b>-0,727</b> |
|                | Adjusted p-value                    | <b>0,030</b> | <b>0,001</b>  | <b>0,009</b>  | 0,186         | 0,290         | 0,254         | <b>0,026</b>  |
| hsa_miR_29a#   | Pearson correlation coefficient (r) | 0,528        | <b>-0,834</b> | <b>-0,737</b> | -0,460        | -0,387        | -0,398        | <b>-0,673</b> |
|                | Adjusted p-value                    | 0,144        | <b>0,005</b>  | <b>0,023</b>  | 0,213         | 0,304         | 0,288         | <b>0,047</b>  |
| hsa_miR_29b    | Pearson correlation coefficient (r) | 0,634        | <b>-0,774</b> | <b>-0,733</b> | -0,596        | -0,515        | -0,536        | <b>-0,765</b> |
|                | Adjusted p-value                    | 0,067        | <b>0,014</b>  | <b>0,025</b>  | 0,090         | 0,156         | 0,137         | <b>0,016</b>  |

|                |                                     |               |               |               |               |              |              |               |
|----------------|-------------------------------------|---------------|---------------|---------------|---------------|--------------|--------------|---------------|
| hsa_miR_29b_1# | Pearson correlation coefficient (r) | 0,623         | <b>-0,714</b> | <b>-0,709</b> | -0,453        | -0,421       | -0,460       | <b>-0,593</b> |
|                | Adjusted p-value                    | 0,073         | <b>0,031</b>  | <b>0,032</b>  | 0,220         | 0,260        | 0,213        | <b>0,093</b>  |
| hsa_miR_29b_2# | Pearson correlation coefficient (r) | 0,611         | <b>-0,807</b> | <b>-0,845</b> | -0,361        | -0,360       | -0,360       | -0,615        |
|                | Adjusted p-value                    | 0,081         | <b>0,009</b>  | <b>0,004</b>  | 0,340         | 0,342        | 0,342        | 0,078         |
| hsa_miR_29c    | Pearson correlation coefficient (r) | <b>0,733</b>  | <b>-0,887</b> | <b>-0,837</b> | -0,589        | -0,527       | -0,539       | <b>-0,810</b> |
|                | Adjusted p-value                    | <b>0,025</b>  | <b>0,001</b>  | <b>0,005</b>  | 0,095         | 0,145        | 0,134        | <b>0,008</b>  |
| hsa_miR_29c#   | Pearson correlation coefficient (r) | <b>0,703</b>  | <b>-0,907</b> | <b>-0,984</b> | -0,573        | -0,564       | -0,562       | <b>-0,827</b> |
|                | Adjusted p-value                    | <b>0,035</b>  | <b>0,001</b>  | <b>0,000</b>  | 0,107         | 0,114        | 0,115        | <b>0,006</b>  |
| hsa_miR_301a   | Pearson correlation coefficient (r) | 0,066         | -0,401        | -0,082        | 0,355         | 0,396        | 0,419        | 0,107         |
|                | Adjusted p-value                    | 0,867         | 0,285         | 0,835         | 0,349         | 0,291        | 0,262        | 0,785         |
| hsa_miR_30a#   | Pearson correlation coefficient (r) | -0,100        | 0,239         | 0,648         | 0,600         | 0,658        | 0,641        | 0,632         |
|                | Adjusted p-value                    | 0,799         | 0,535         | 0,059         | 0,088         | 0,054        | 0,063        | 0,068         |
| hsa_miR_30b    | Pearson correlation coefficient (r) | 0,487         | <b>-0,700</b> | -0,592        | -0,474        | -0,376       | -0,400       | -0,635        |
|                | Adjusted p-value                    | 0,184         | <b>0,036</b>  | 0,093         | 0,198         | 0,318        | 0,286        | 0,066         |
| hsa_miR_30c    | Pearson correlation coefficient (r) | 0,584         | <b>-0,878</b> | <b>-0,832</b> | -0,564        | -0,471       | -0,506       | <b>-0,789</b> |
|                | Adjusted p-value                    | 0,099         | <b>0,002</b>  | <b>0,005</b>  | 0,114         | 0,201        | 0,165        | <b>0,012</b>  |
| hsa_miR_30d    | Pearson correlation coefficient (r) | 0,537         | <b>-0,779</b> | <b>-0,769</b> | -0,500        | -0,468       | -0,452       | <b>-0,739</b> |
|                | Adjusted p-value                    | 0,136         | <b>0,013</b>  | <b>0,015</b>  | 0,170         | 0,204        | 0,222        | <b>0,023</b>  |
| hsa_miR_30d#   | Pearson correlation coefficient (r) | -0,468        | 0,374         | 0,544         | 0,497         | 0,456        | 0,472        | 0,568         |
|                | Adjusted p-value                    | 0,204         | 0,322         | 0,130         | 0,173         | 0,217        | 0,200        | 0,111         |
| hsa_miR_30e    | Pearson correlation coefficient (r) | 0,196         | -0,312        | -0,134        | -0,484        | -0,369       | -0,439       | -0,426        |
|                | Adjusted p-value                    | 0,613         | 0,413         | 0,732         | 0,187         | 0,328        | 0,238        | 0,253         |
| hsa_miR_30e#   | Pearson correlation coefficient (r) | -0,342        | 0,159         | 0,518         | <b>0,696</b>  | <b>0,804</b> | <b>0,761</b> | 0,637         |
|                | Adjusted p-value                    | 0,368         | 0,683         | 0,154         | <b>0,037</b>  | <b>0,009</b> | <b>0,017</b> | 0,065         |
| hsa_miR_31     | Pearson correlation coefficient (r) | <b>-0,786</b> | <b>0,864</b>  | <b>0,882</b>  | <b>0,680</b>  | <b>0,674</b> | 0,658        | <b>0,877</b>  |
|                | Adjusted p-value                    | <b>0,012</b>  | <b>0,003</b>  | <b>0,002</b>  | <b>0,044</b>  | <b>0,047</b> | 0,054        | <b>0,002</b>  |
| hsa_miR_31#    | Pearson correlation coefficient (r) | -0,458        | 0,677         | <b>0,816</b>  | <b>0,755</b>  | <b>0,711</b> | <b>0,755</b> | <b>0,835</b>  |
|                | Adjusted p-value                    | 0,253         | 0,065         | <b>0,013</b>  | <b>0,030</b>  | <b>0,048</b> | <b>0,030</b> | <b>0,010</b>  |
| hsa_miR_32     | Pearson correlation coefficient (r) | <b>0,678</b>  | <b>-0,769</b> | -0,537        | -0,431        | -0,309       | -0,343       | -0,603        |
|                | Adjusted p-value                    | <b>0,045</b>  | <b>0,015</b>  | 0,136         | 0,247         | 0,419        | 0,367        | 0,086         |
| hsa_miR_320a   | Pearson correlation coefficient (r) | <b>0,716</b>  | <b>-0,903</b> | <b>-0,952</b> | -0,606        | -0,576       | -0,586       | <b>-0,847</b> |
|                | Adjusted p-value                    | <b>0,030</b>  | <b>0,001</b>  | <b>0,000</b>  | 0,084         | 0,105        | 0,097        | <b>0,004</b>  |
| hsa_miR_320b   | Pearson correlation coefficient (r) | <b>0,741</b>  | <b>-0,867</b> | <b>-0,920</b> | <b>-0,678</b> | -0,643       | -0,651       | <b>-0,894</b> |

|                |                                     |              |               |               |               |               |               |               |
|----------------|-------------------------------------|--------------|---------------|---------------|---------------|---------------|---------------|---------------|
|                | Adjusted p-value                    | <b>0,022</b> | <b>0,002</b>  | <b>0,000</b>  | <b>0,045</b>  | 0,062         | 0,058         | <b>0,001</b>  |
| hsa_miR_323_3p | Pearson correlation coefficient (r) | 0,549        | <b>-0,727</b> | -0,497        | -0,391        | -0,227        | -0,291        | -0,542        |
|                | Adjusted p-value                    | 0,126        | <b>0,027</b>  | 0,173         | 0,298         | 0,557         | 0,447         | 0,131         |
| hsa_miR_324_3p | Pearson correlation coefficient (r) | <b>0,791</b> | <b>-0,901</b> | <b>-0,876</b> | -0,566        | -0,505        | -0,526        | <b>-0,810</b> |
|                | Adjusted p-value                    | <b>0,011</b> | <b>0,001</b>  | <b>0,002</b>  | 0,112         | 0,166         | 0,145         | <b>0,008</b>  |
| hsa_miR_324_5p | Pearson correlation coefficient (r) | <b>0,755</b> | <b>-0,847</b> | <b>-0,849</b> | -0,605        | -0,546        | -0,564        | <b>-0,830</b> |
|                | Adjusted p-value                    | <b>0,019</b> | <b>0,004</b>  | <b>0,004</b>  | 0,085         | 0,129         | 0,113         | <b>0,006</b>  |
| hsa_miR_326    | Pearson correlation coefficient (r) | 0,162        | -0,445        | -0,501        | -0,228        | -0,202        | -0,229        | -0,363        |
|                | Adjusted p-value                    | 0,676        | 0,231         | 0,169         | 0,556         | 0,602         | 0,553         | 0,337         |
| hsa_miR_328    | Pearson correlation coefficient (r) | <b>0,726</b> | <b>-0,832</b> | <b>-0,848</b> | -0,648        | -0,626        | -0,631        | <b>-0,848</b> |
|                | Adjusted p-value                    | <b>0,027</b> | <b>0,005</b>  | <b>0,004</b>  | 0,059         | 0,071         | 0,068         | <b>0,004</b>  |
| hsa_miR_329    | Pearson correlation coefficient (r) | 0,543        | <b>-0,739</b> | <b>-0,860</b> | <b>-0,726</b> | -0,662        | <b>-0,700</b> | <b>-0,867</b> |
|                | Adjusted p-value                    | 0,130        | <b>0,023</b>  | <b>0,003</b>  | <b>0,027</b>  | 0,052         | <b>0,036</b>  | <b>0,002</b>  |
| hsa_miR_330_5p | Pearson correlation coefficient (r) | 0,291        | -0,233        | -0,630        | <b>-0,747</b> | <b>-0,756</b> | <b>-0,761</b> | <b>-0,745</b> |
|                | Adjusted p-value                    | 0,485        | 0,579         | 0,094         | <b>0,033</b>  | <b>0,030</b>  | <b>0,028</b>  | <b>0,034</b>  |
| hsa_miR_331_3p | Pearson correlation coefficient (r) | 0,661        | <b>-0,827</b> | <b>-0,794</b> | -0,549        | -0,496        | -0,508        | <b>-0,766</b> |
|                | Adjusted p-value                    | 0,053        | <b>0,006</b>  | <b>0,011</b>  | 0,126         | 0,175         | 0,163         | <b>0,016</b>  |
| hsa_miR_335    | Pearson correlation coefficient (r) | 0,537        | -0,433        | -0,116        | -0,243        | -0,060        | -0,126        | -0,302        |
|                | Adjusted p-value                    | 0,136        | 0,245         | 0,767         | 0,528         | 0,879         | 0,746         | 0,429         |
| hsa_miR_337_3p | Pearson correlation coefficient (r) | <b>0,904</b> | <b>-0,888</b> | <b>-0,863</b> | -0,495        | -0,467        | -0,472        | <b>-0,737</b> |
|                | Adjusted p-value                    | <b>0,001</b> | <b>0,001</b>  | <b>0,003</b>  | 0,176         | 0,205         | 0,199         | <b>0,023</b>  |
| hsa_miR_337_5p | Pearson correlation coefficient (r) | 0,596        | <b>-0,696</b> | <b>-0,793</b> | -0,576        | -0,550        | -0,558        | <b>-0,747</b> |
|                | Adjusted p-value                    | 0,090        | <b>0,037</b>  | <b>0,011</b>  | 0,105         | 0,125         | 0,118         | <b>0,021</b>  |
| hsa_miR_338_3p | Pearson correlation coefficient (r) | 0,124        | -0,602        | -0,338        | -0,052        | 0,082         | 0,026         | -0,234        |
|                | Adjusted p-value                    | 0,751        | 0,086         | 0,373         | 0,895         | 0,834         | 0,947         | 0,544         |
| hsa_miR_339_3p | Pearson correlation coefficient (r) | 0,662        | <b>-0,893</b> | <b>-0,873</b> | -0,610        | -0,541        | -0,556        | <b>-0,846</b> |
|                | Adjusted p-value                    | 0,052        | <b>0,001</b>  | <b>0,002</b>  | 0,081         | 0,133         | 0,120         | <b>0,004</b>  |
| hsa_miR_339_5p | Pearson correlation coefficient (r) | 0,617        | <b>-0,794</b> | <b>-0,796</b> | -0,653        | -0,597        | -0,613        | <b>-0,828</b> |
|                | Adjusted p-value                    | 0,077        | <b>0,011</b>  | <b>0,010</b>  | 0,056         | 0,089         | 0,079         | <b>0,006</b>  |
| hsa_miR_33a    | Pearson correlation coefficient (r) | <b>0,679</b> | <b>-0,847</b> | <b>-0,726</b> | -0,469        | -0,394        | -0,413        | <b>-0,690</b> |
|                | Adjusted p-value                    | <b>0,044</b> | <b>0,004</b>  | <b>0,027</b>  | 0,203         | 0,294         | 0,270         | <b>0,039</b>  |
| hsa_miR_33a#   | Pearson correlation coefficient (r) | 0,428        | -0,575        | -0,592        | -0,617        | -0,602        | -0,604        | <b>-0,708</b> |
|                | Adjusted p-value                    | 0,250        | 0,106         | 0,093         | 0,077         | 0,086         | 0,085         | <b>0,033</b>  |

|                |                                     |              |               |               |               |              |               |               |
|----------------|-------------------------------------|--------------|---------------|---------------|---------------|--------------|---------------|---------------|
| hsa_miR_33b    | Pearson correlation coefficient (r) | <b>0,767</b> | <b>-0,977</b> | <b>-0,916</b> | -0,515        | -0,464       | -0,481        | <b>-0,781</b> |
|                | Adjusted p-value                    | <b>0,026</b> | <b>0,000</b>  | <b>0,001</b>  | 0,191         | 0,246        | 0,228         | <b>0,022</b>  |
| hsa_miR_340    | Pearson correlation coefficient (r) | -0,323       | 0,516         | 0,374         | 0,089         | 0,003        | 0,062         | 0,255         |
|                | Adjusted p-value                    | 0,397        | 0,155         | 0,321         | 0,819         | 0,994        | 0,875         | 0,508         |
| hsa_miR_340#   | Pearson correlation coefficient (r) | -0,527       | 0,584         | 0,467         | <b>0,762</b>  | <b>0,740</b> | <b>0,749</b>  | <b>0,767</b>  |
|                | Adjusted p-value                    | 0,179        | 0,128         | 0,244         | <b>0,028</b>  | <b>0,036</b> | <b>0,032</b>  | <b>0,026</b>  |
| hsa_miR_342_3p | Pearson correlation coefficient (r) | 0,202        | -0,181        | -0,383        | <b>-0,730</b> | -0,667       | <b>-0,703</b> | -0,643        |
|                | Adjusted p-value                    | 0,602        | 0,641         | 0,309         | <b>0,026</b>  | 0,050        | <b>0,035</b>  | 0,062         |
| hsa_miR_34a    | Pearson correlation coefficient (r) | <b>0,682</b> | <b>-0,917</b> | <b>-0,887</b> | -0,480        | -0,425       | -0,442        | <b>-0,746</b> |
|                | Adjusted p-value                    | <b>0,043</b> | <b>0,000</b>  | <b>0,001</b>  | 0,191         | 0,255        | 0,234         | <b>0,021</b>  |
| hsa_miR_34a#   | Pearson correlation coefficient (r) | 0,637        | <b>-0,794</b> | <b>-0,742</b> | -0,501        | -0,444       | -0,445        | <b>-0,723</b> |
|                | Adjusted p-value                    | 0,065        | <b>0,011</b>  | <b>0,022</b>  | 0,169         | 0,231        | 0,230         | <b>0,028</b>  |
| hsa_miR_34b    | Pearson correlation coefficient (r) | -0,526       | 0,520         | <b>0,784</b>  | <b>0,907</b>  | <b>0,931</b> | <b>0,921</b>  | <b>0,933</b>  |
|                | Adjusted p-value                    | 0,146        | 0,151         | <b>0,012</b>  | <b>0,001</b>  | <b>0,000</b> | <b>0,000</b>  | <b>0,000</b>  |
| hsa_miR_34b#   | Pearson correlation coefficient (r) | -0,507       | 0,503         | <b>0,795</b>  | <b>0,867</b>  | <b>0,899</b> | <b>0,882</b>  | <b>0,913</b>  |
|                | Adjusted p-value                    | 0,164        | 0,167         | <b>0,010</b>  | <b>0,002</b>  | <b>0,001</b> | <b>0,002</b>  | <b>0,001</b>  |
| hsa_miR_34c_5p | Pearson correlation coefficient (r) | -0,513       | 0,522         | <b>0,816</b>  | <b>0,842</b>  | <b>0,883</b> | <b>0,862</b>  | <b>0,902</b>  |
|                | Adjusted p-value                    | 0,158        | 0,149         | <b>0,007</b>  | <b>0,004</b>  | <b>0,002</b> | <b>0,003</b>  | <b>0,001</b>  |
| hsa_miR_361_3p | Pearson correlation coefficient (r) | 0,585        | <b>-0,725</b> | <b>-0,809</b> | -0,525        | -0,505       | -0,515        | <b>-0,725</b> |
|                | Adjusted p-value                    | 0,098        | <b>0,027</b>  | <b>0,008</b>  | 0,147         | 0,166        | 0,156         | <b>0,027</b>  |
| hsa_miR_362_3p | Pearson correlation coefficient (r) | 0,343        | -0,577        | <b>-0,688</b> | -0,343        | -0,298       | -0,331        | -0,491        |
|                | Adjusted p-value                    | 0,366        | 0,104         | <b>0,040</b>  | 0,367         | 0,436        | 0,385         | 0,180         |
| hsa_miR_362_5p | Pearson correlation coefficient (r) | <b>0,798</b> | <b>-0,741</b> | <b>-0,850</b> | -0,510        | -0,516       | -0,508        | <b>-0,715</b> |
|                | Adjusted p-value                    | <b>0,010</b> | <b>0,022</b>  | <b>0,004</b>  | 0,161         | 0,155        | 0,163         | <b>0,030</b>  |
| hsa_miR_363    | Pearson correlation coefficient (r) | -0,336       | 0,253         | 0,396         | 0,014         | 0,081        | 0,052         | 0,192         |
|                | Adjusted p-value                    | 0,461        | 0,585         | 0,380         | 0,976         | 0,863        | 0,912         | 0,680         |
| hsa_miR_365    | Pearson correlation coefficient (r) | <b>0,762</b> | <b>-0,884</b> | <b>-0,761</b> | -0,548        | -0,468       | -0,486        | <b>-0,749</b> |
|                | Adjusted p-value                    | <b>0,017</b> | <b>0,002</b>  | <b>0,017</b>  | 0,127         | 0,204        | 0,185         | <b>0,020</b>  |
| hsa_miR_369_5p | Pearson correlation coefficient (r) | 0,139        | -0,478        | -0,441        | -0,467        | -0,348       | -0,402        | -0,527        |
|                | Adjusted p-value                    | 0,722        | 0,193         | 0,235         | 0,205         | 0,359        | 0,283         | 0,145         |
| hsa_miR_370    | Pearson correlation coefficient (r) | 0,600        | <b>-0,819</b> | <b>-0,706</b> | -0,330        | -0,235       | -0,280        | -0,569        |
|                | Adjusted p-value                    | 0,088        | <b>0,007</b>  | <b>0,033</b>  | 0,385         | 0,543        | 0,466         | 0,110         |
| hsa_miR_371_3p | Pearson correlation coefficient (r) | -0,543       | 0,423         | 0,530         | 0,496         | 0,597        | 0,521         | 0,581         |

|               |                                     |               |               |               |               |              |              |               |
|---------------|-------------------------------------|---------------|---------------|---------------|---------------|--------------|--------------|---------------|
|               | Adjusted p-value                    | 0,131         | 0,256         | 0,142         | 0,175         | 0,090        | 0,150        | 0,101         |
| hsa_miR_372   | Pearson correlation coefficient (r) | -0,097        | 0,323         | 0,619         | 0,545         | 0,506        | 0,507        | 0,671         |
|               | Adjusted p-value                    | 0,836         | 0,479         | 0,138         | 0,206         | 0,247        | 0,245        | 0,099         |
| hsa_miR_373   | Pearson correlation coefficient (r) | <b>-0,759</b> | <b>0,829</b>  | <b>0,784</b>  | <b>0,717</b>  | 0,629        | 0,640        | <b>0,879</b>  |
|               | Adjusted p-value                    | <b>0,029</b>  | <b>0,011</b>  | <b>0,021</b>  | <b>0,045</b>  | 0,095        | 0,087        | <b>0,004</b>  |
| hsa_miR_373#  | Pearson correlation coefficient (r) | -0,563        | 0,278         | 0,481         | 0,719         | <b>0,820</b> | 0,747        | 0,719         |
|               | Adjusted p-value                    | 0,189         | 0,546         | 0,274         | 0,068         | <b>0,024</b> | 0,053        | 0,068         |
| hsa_miR_374a  | Pearson correlation coefficient (r) | <b>0,705</b>  | <b>-0,925</b> | <b>-0,898</b> | -0,568        | -0,522       | -0,525       | <b>-0,819</b> |
|               | Adjusted p-value                    | <b>0,034</b>  | <b>0,000</b>  | <b>0,001</b>  | 0,110         | 0,150        | 0,147        | <b>0,007</b>  |
| hsa_miR_374b  | Pearson correlation coefficient (r) | <b>0,793</b>  | <b>-0,701</b> | <b>-0,679</b> | <b>-0,754</b> | -0,664       | -0,690       | <b>-0,858</b> |
|               | Adjusted p-value                    | <b>0,011</b>  | <b>0,035</b>  | <b>0,044</b>  | <b>0,019</b>  | 0,051        | 0,040        | <b>0,003</b>  |
| hsa_miR_374b# | Pearson correlation coefficient (r) | <b>0,754</b>  | <b>-0,947</b> | <b>-0,926</b> | -0,528        | -0,493       | -0,497       | <b>-0,794</b> |
|               | Adjusted p-value                    | <b>0,019</b>  | <b>0,000</b>  | <b>0,000</b>  | 0,144         | 0,178        | 0,173        | <b>0,011</b>  |
| hsa_miR_375   | Pearson correlation coefficient (r) | -0,507        | 0,536         | <b>0,829</b>  | <b>0,774</b>  | <b>0,815</b> | <b>0,787</b> | <b>0,870</b>  |
|               | Adjusted p-value                    | 0,164         | 0,137         | <b>0,006</b>  | <b>0,014</b>  | <b>0,007</b> | <b>0,012</b> | <b>0,002</b>  |
| hsa_miR_376a  | Pearson correlation coefficient (r) | <b>0,761</b>  | <b>-0,836</b> | <b>-0,738</b> | -0,426        | -0,354       | -0,371       | -0,661        |
|               | Adjusted p-value                    | <b>0,017</b>  | <b>0,005</b>  | <b>0,023</b>  | 0,253         | 0,350        | 0,325        | 0,053         |
| hsa_miR_376b  | Pearson correlation coefficient (r) | 0,655         | <b>-0,870</b> | <b>-0,851</b> | -0,456        | -0,420       | -0,421       | <b>-0,722</b> |
|               | Adjusted p-value                    | 0,055         | <b>0,002</b>  | <b>0,004</b>  | 0,218         | 0,261        | 0,260        | <b>0,028</b>  |
| hsa_miR_376c  | Pearson correlation coefficient (r) | 0,599         | <b>-0,796</b> | <b>-0,768</b> | -0,427        | -0,374       | -0,388       | -0,656        |
|               | Adjusted p-value                    | 0,089         | <b>0,010</b>  | <b>0,016</b>  | 0,252         | 0,321        | 0,302        | 0,055         |
| hsa_miR_377   | Pearson correlation coefficient (r) | 0,601         | <b>-0,797</b> | <b>-0,757</b> | -0,432        | -0,358       | -0,385       | -0,655        |
|               | Adjusted p-value                    | 0,087         | <b>0,010</b>  | <b>0,018</b>  | 0,245         | 0,344        | 0,306        | 0,056         |
| hsa_miR_378   | Pearson correlation coefficient (r) | -0,258        | -0,043        | -0,099        | 0,354         | 0,271        | 0,316        | 0,223         |
|               | Adjusted p-value                    | 0,502         | 0,912         | 0,800         | 0,350         | 0,481        | 0,407        | 0,564         |
| hsa_miR_379   | Pearson correlation coefficient (r) | <b>0,742</b>  | <b>-0,778</b> | <b>-0,709</b> | -0,407        | -0,357       | -0,366       | -0,633        |
|               | Adjusted p-value                    | <b>0,022</b>  | <b>0,014</b>  | <b>0,033</b>  | 0,277         | 0,345        | 0,332        | 0,067         |
| hsa_miR_381   | Pearson correlation coefficient (r) | <b>0,735</b>  | <b>-0,876</b> | <b>-0,834</b> | -0,529        | -0,472       | -0,484       | <b>-0,765</b> |
|               | Adjusted p-value                    | <b>0,024</b>  | <b>0,002</b>  | <b>0,005</b>  | 0,143         | 0,200        | 0,187        | <b>0,016</b>  |
| hsa_miR_382   | Pearson correlation coefficient (r) | 0,638         | <b>-0,764</b> | <b>-0,761</b> | -0,431        | -0,381       | -0,403       | -0,644        |
|               | Adjusted p-value                    | 0,064         | <b>0,017</b>  | <b>0,017</b>  | 0,247         | 0,311        | 0,282        | 0,061         |
| hsa_miR_383   | Pearson correlation coefficient (r) | -0,169        | -0,047        | -0,430        | -0,539        | -0,610       | -0,632       | -0,418        |
|               | Adjusted p-value                    | 0,717         | 0,920         | 0,335         | 0,212         | 0,146        | 0,128        | 0,350         |



|                    |                                     |              |               |               |               |              |              |               |
|--------------------|-------------------------------------|--------------|---------------|---------------|---------------|--------------|--------------|---------------|
| hsa_miR_409_3p     | Pearson correlation coefficient (r) | 0,522        | <b>-0,804</b> | <b>-0,736</b> | -0,516        | -0,401       | -0,449       | <b>-0,708</b> |
|                    | Adjusted p-value                    | 0,149        | <b>0,009</b>  | <b>0,024</b>  | 0,155         | 0,285        | 0,225        | <b>0,033</b>  |
| hsa_miR_409_5p     | Pearson correlation coefficient (r) | -0,226       | 0,056         | -0,249        | -0,036        | -0,087       | -0,065       | -0,109        |
|                    | Adjusted p-value                    | 0,558        | 0,887         | 0,518         | 0,927         | 0,824        | 0,868        | 0,781         |
| hsa_miR_410        | Pearson correlation coefficient (r) | 0,262        | -0,537        | -0,495        | -0,362        | -0,282       | -0,325       | -0,481        |
|                    | Adjusted p-value                    | 0,496        | 0,136         | 0,175         | 0,338         | 0,462        | 0,394        | 0,190         |
| hsa_miR_411        | Pearson correlation coefficient (r) | 0,526        | <b>-0,778</b> | <b>-0,689</b> | -0,354        | -0,263       | -0,301       | -0,573        |
|                    | Adjusted p-value                    | 0,145        | <b>0,013</b>  | <b>0,040</b>  | 0,350         | 0,494        | 0,432        | 0,107         |
| hsa_miR_421        | Pearson correlation coefficient (r) | <b>0,736</b> | <b>-0,797</b> | <b>-0,703</b> | -0,438        | -0,390       | -0,394       | -0,655        |
|                    | Adjusted p-value                    | <b>0,024</b> | <b>0,010</b>  | <b>0,035</b>  | 0,238         | 0,300        | 0,294        | 0,056         |
| hsa_miR_423_3p     | Pearson correlation coefficient (r) | <b>0,766</b> | <b>-0,903</b> | <b>-0,857</b> | -0,522        | -0,457       | -0,488       | <b>-0,759</b> |
|                    | Adjusted p-value                    | <b>0,016</b> | <b>0,001</b>  | <b>0,003</b>  | 0,150         | 0,217        | 0,182        | <b>0,018</b>  |
| hsa_miR_423_5p     | Pearson correlation coefficient (r) | <b>0,688</b> | <b>-0,881</b> | <b>-0,929</b> | -0,545        | -0,536       | -0,531       | <b>-0,804</b> |
|                    | Adjusted p-value                    | <b>0,041</b> | <b>0,002</b>  | <b>0,000</b>  | 0,129         | 0,137        | 0,141        | <b>0,009</b>  |
| hsa_miR_423_5p_dup | Pearson correlation coefficient (r) | <b>0,742</b> | <b>-0,851</b> | <b>-0,861</b> | <b>-0,677</b> | -0,663       | -0,654       | <b>-0,881</b> |
|                    | Adjusted p-value                    | <b>0,022</b> | <b>0,004</b>  | <b>0,003</b>  | <b>0,045</b>  | 0,051        | 0,056        | <b>0,002</b>  |
| hsa_miR_424        | Pearson correlation coefficient (r) | <b>0,799</b> | <b>-0,928</b> | <b>-0,823</b> | -0,328        | -0,290       | -0,292       | -0,641        |
|                    | Adjusted p-value                    | <b>0,017</b> | <b>0,001</b>  | <b>0,012</b>  | 0,428         | 0,485        | 0,483        | 0,087         |
| hsa_miR_424#       | Pearson correlation coefficient (r) | <b>0,810</b> | <b>-0,934</b> | <b>-0,837</b> | -0,431        | -0,397       | -0,394       | <b>-0,710</b> |
|                    | Adjusted p-value                    | <b>0,008</b> | <b>0,000</b>  | <b>0,005</b>  | 0,247         | 0,290        | 0,295        | <b>0,032</b>  |
| hsa_miR_425        | Pearson correlation coefficient (r) | 0,496        | -0,429        | -0,166        | -0,230        | -0,130       | -0,134       | -0,308        |
|                    | Adjusted p-value                    | 0,174        | 0,250         | 0,670         | 0,552         | 0,740        | 0,732        | 0,420         |
| hsa_miR_425#       | Pearson correlation coefficient (r) | <b>0,732</b> | -0,424        | -0,170        | -0,032        | 0,050        | 0,059        | -0,207        |
|                    | Adjusted p-value                    | <b>0,025</b> | 0,255         | 0,661         | 0,935         | 0,898        | 0,881        | 0,593         |
| hsa_miR_431        | Pearson correlation coefficient (r) | 0,242        | -0,068        | -0,031        | 0,217         | 0,184        | 0,188        | 0,102         |
|                    | Adjusted p-value                    | 0,564        | 0,873         | 0,941         | 0,607         | 0,663        | 0,656        | 0,809         |
| hsa_miR_431#       | Pearson correlation coefficient (r) | <b>0,850</b> | <b>-0,886</b> | <b>-0,816</b> | -0,460        | -0,407       | -0,436       | -0,684        |
|                    | Adjusted p-value                    | <b>0,007</b> | <b>0,003</b>  | <b>0,013</b>  | 0,251         | 0,317        | 0,281        | 0,061         |
| hsa_miR_432        | Pearson correlation coefficient (r) | 0,410        | -0,654        | -0,459        | -0,209        | -0,091       | -0,140       | -0,393        |
|                    | Adjusted p-value                    | 0,273        | 0,056         | 0,214         | 0,590         | 0,815        | 0,720        | 0,296         |
| hsa_miR_433        | Pearson correlation coefficient (r) | 0,273        | -0,610        | -0,679        | -0,099        | -0,102       | -0,132       | -0,278        |
|                    | Adjusted p-value                    | 0,553        | 0,145         | 0,093         | 0,834         | 0,829        | 0,778        | 0,547         |
| hsa_miR_449a       | Pearson correlation coefficient (r) | -0,510       | 0,477         | <b>0,765</b>  | <b>0,873</b>  | <b>0,915</b> | <b>0,890</b> | <b>0,907</b>  |

|                 |                                     |               |               |               |              |              |              |               |
|-----------------|-------------------------------------|---------------|---------------|---------------|--------------|--------------|--------------|---------------|
|                 | Adjusted p-value                    | 0,161         | 0,194         | <b>0,016</b>  | <b>0,002</b> | <b>0,001</b> | <b>0,001</b> | <b>0,001</b>  |
| hsa_miR_449b    | Pearson correlation coefficient (r) | -0,496        | 0,557         | <b>0,828</b>  | <b>0,826</b> | <b>0,845</b> | <b>0,836</b> | <b>0,894</b>  |
|                 | Adjusted p-value                    | 0,175         | 0,119         | <b>0,006</b>  | <b>0,006</b> | <b>0,004</b> | <b>0,005</b> | <b>0,001</b>  |
| hsa_miR_449b#   | Pearson correlation coefficient (r) | -0,753        | <b>0,969</b>  | <b>0,926</b>  | <b>0,828</b> | <b>0,779</b> | <b>0,807</b> | <b>0,939</b>  |
|                 | Adjusted p-value                    | 0,051         | <b>0,000</b>  | <b>0,003</b>  | <b>0,021</b> | <b>0,039</b> | <b>0,028</b> | <b>0,002</b>  |
| hsa_miR_450a    | Pearson correlation coefficient (r) | <b>0,833</b>  | <b>-0,929</b> | <b>-0,787</b> | -0,451       | -0,357       | -0,397       | <b>-0,690</b> |
|                 | Adjusted p-value                    | <b>0,005</b>  | <b>0,000</b>  | <b>0,012</b>  | 0,224        | 0,346        | 0,290        | <b>0,040</b>  |
| hsa_miR_450b_3p | Pearson correlation coefficient (r) | 0,480         | -0,351        | 0,141         | -0,081       | 0,083        | 0,041        | -0,117        |
|                 | Adjusted p-value                    | 0,228         | 0,393         | 0,740         | 0,849        | 0,845        | 0,924        | 0,783         |
| hsa_miR_450b_5p | Pearson correlation coefficient (r) | <b>0,669</b>  | <b>-0,795</b> | <b>-0,682</b> | -0,170       | -0,127       | -0,127       | -0,456        |
|                 | Adjusted p-value                    | <b>0,049</b>  | <b>0,010</b>  | <b>0,043</b>  | 0,662        | 0,745        | 0,744        | 0,217         |
| hsa_miR_451     | Pearson correlation coefficient (r) | -0,453        | 0,396         | 0,368         | 0,085        | 0,102        | 0,092        | 0,269         |
|                 | Adjusted p-value                    | 0,221         | 0,291         | 0,330         | 0,827        | 0,794        | 0,814        | 0,485         |
| hsa_miR_452     | Pearson correlation coefficient (r) | -0,584        | 0,343         | 0,110         | 0,081        | 0,118        | 0,041        | 0,211         |
|                 | Adjusted p-value                    | 0,169         | 0,451         | 0,814         | 0,863        | 0,802        | 0,930        | 0,650         |
| hsa_miR_454     | Pearson correlation coefficient (r) | 0,322         | -0,225        | -0,225        | -0,479       | -0,450       | -0,435       | -0,443        |
|                 | Adjusted p-value                    | 0,398         | 0,561         | 0,560         | 0,192        | 0,224        | 0,241        | 0,232         |
| hsa_miR_455_3p  | Pearson correlation coefficient (r) | <b>0,768</b>  | <b>-0,920</b> | <b>-0,941</b> | -0,566       | -0,550       | -0,546       | <b>-0,824</b> |
|                 | Adjusted p-value                    | <b>0,016</b>  | <b>0,000</b>  | <b>0,000</b>  | 0,112        | 0,125        | 0,128        | <b>0,006</b>  |
| hsa_miR_455_5p  | Pearson correlation coefficient (r) | <b>0,681</b>  | <b>-0,926</b> | <b>-0,914</b> | -0,564       | -0,519       | -0,526       | <b>-0,817</b> |
|                 | Adjusted p-value                    | <b>0,043</b>  | <b>0,000</b>  | <b>0,001</b>  | 0,114        | 0,152        | 0,146        | <b>0,007</b>  |
| hsa_miR_483_3p  | Pearson correlation coefficient (r) | 0,107         | -0,183        | -0,461        | -0,275       | -0,280       | -0,300       | -0,350        |
|                 | Adjusted p-value                    | 0,784         | 0,637         | 0,211         | 0,473        | 0,465        | 0,432        | 0,356         |
| hsa_miR_484     | Pearson correlation coefficient (r) | -0,124        | -0,293        | -0,219        | -0,164       | -0,039       | -0,115       | -0,198        |
|                 | Adjusted p-value                    | 0,751         | 0,443         | 0,571         | 0,673        | 0,921        | 0,768        | 0,610         |
| hsa_miR_485_3p  | Pearson correlation coefficient (r) | <b>0,732</b>  | -0,656        | <b>-0,736</b> | -0,654       | -0,627       | -0,646       | <b>-0,765</b> |
|                 | Adjusted p-value                    | <b>0,025</b>  | 0,055         | <b>0,024</b>  | 0,056        | 0,071        | 0,060        | <b>0,016</b>  |
| hsa_miR_486_5p  | Pearson correlation coefficient (r) | -0,564        | 0,469         | 0,476         | 0,286        | 0,289        | 0,294        | 0,459         |
|                 | Adjusted p-value                    | 0,146         | 0,241         | 0,233         | 0,492        | 0,488        | 0,480        | 0,252         |
| hsa_miR_487b    | Pearson correlation coefficient (r) | 0,411         | <b>-0,669</b> | -0,497        | -0,129       | 0,006        | -0,061       | -0,337        |
|                 | Adjusted p-value                    | 0,271         | <b>0,049</b>  | 0,174         | 0,741        | 0,987        | 0,875        | 0,376         |
| hsa_miR_488     | Pearson correlation coefficient (r) | <b>-0,736</b> | <b>0,714</b>  | <b>0,797</b>  | <b>0,819</b> | <b>0,784</b> | <b>0,776</b> | <b>0,958</b>  |
|                 | Adjusted p-value                    | <b>0,024</b>  | <b>0,031</b>  | <b>0,010</b>  | <b>0,007</b> | <b>0,012</b> | <b>0,014</b> | <b>0,000</b>  |

|                |                                     |              |               |               |               |               |               |               |
|----------------|-------------------------------------|--------------|---------------|---------------|---------------|---------------|---------------|---------------|
| hsa_miR_489    | Pearson correlation coefficient (r) | <b>0,857</b> | <b>-0,910</b> | <b>-0,788</b> | -0,584        | -0,501        | -0,532        | <b>-0,801</b> |
|                | Adjusted p-value                    | <b>0,014</b> | <b>0,004</b>  | <b>0,035</b>  | 0,169         | 0,252         | 0,219         | <b>0,030</b>  |
| hsa_miR_491_5p | Pearson correlation coefficient (r) | 0,616        | <b>-0,793</b> | <b>-0,782</b> | -0,617        | -0,602        | -0,597        | <b>-0,795</b> |
|                | Adjusted p-value                    | 0,104        | <b>0,019</b>  | <b>0,022</b>  | 0,104         | 0,114         | 0,118         | <b>0,018</b>  |
| hsa_miR_493#   | Pearson correlation coefficient (r) | 0,517        | <b>-0,685</b> | -0,552        | -0,322        | -0,213        | -0,258        | -0,508        |
|                | Adjusted p-value                    | 0,154        | <b>0,042</b>  | 0,123         | 0,398         | 0,582         | 0,502         | 0,163         |
| hsa_miR_494    | Pearson correlation coefficient (r) | 0,518        | <b>-0,810</b> | <b>-0,748</b> | -0,499        | -0,382        | -0,445        | <b>-0,680</b> |
|                | Adjusted p-value                    | 0,153        | <b>0,008</b>  | <b>0,020</b>  | 0,171         | 0,310         | 0,230         | <b>0,044</b>  |
| hsa_miR_495    | Pearson correlation coefficient (r) | 0,547        | -0,651        | -0,616        | -0,518        | -0,415        | -0,465        | -0,648        |
|                | Adjusted p-value                    | 0,128        | 0,058         | 0,078         | 0,153         | 0,267         | 0,207         | 0,059         |
| hsa_miR_497    | Pearson correlation coefficient (r) | 0,603        | <b>-0,927</b> | <b>-0,829</b> | -0,446        | -0,371        | -0,393        | <b>-0,707</b> |
|                | Adjusted p-value                    | 0,086        | <b>0,000</b>  | <b>0,006</b>  | 0,229         | 0,326         | 0,295         | <b>0,033</b>  |
| hsa_miR_498    | Pearson correlation coefficient (r) | -0,534       | <b>0,758</b>  | <b>0,687</b>  | 0,399         | 0,356         | 0,360         | 0,578         |
|                | Adjusted p-value                    | 0,139        | <b>0,018</b>  | <b>0,041</b>  | 0,288         | 0,347         | 0,341         | 0,103         |
| hsa_miR_499_5p | Pearson correlation coefficient (r) | -0,534       | 0,297         | 0,400         | <b>0,807</b>  | <b>0,728</b>  | <b>0,766</b>  | <b>0,769</b>  |
|                | Adjusted p-value                    | 0,173        | 0,476         | 0,326         | <b>0,015</b>  | <b>0,041</b>  | <b>0,027</b>  | <b>0,026</b>  |
| hsa_miR_500    | Pearson correlation coefficient (r) | <b>0,759</b> | <b>-0,829</b> | <b>-0,869</b> | -0,376        | -0,348        | -0,348        | <b>-0,672</b> |
|                | Adjusted p-value                    | <b>0,018</b> | <b>0,006</b>  | <b>0,002</b>  | 0,319         | 0,358         | 0,358         | <b>0,047</b>  |
| hsa_miR_501_3p | Pearson correlation coefficient (r) | <b>0,742</b> | -0,536        | <b>-0,697</b> | -0,470        | -0,507        | -0,485        | -0,626        |
|                | Adjusted p-value                    | <b>0,022</b> | 0,137         | <b>0,037</b>  | 0,202         | 0,164         | 0,186         | 0,071         |
| hsa_miR_501_5p | Pearson correlation coefficient (r) | 0,488        | -0,482        | -0,656        | -0,439        | -0,418        | -0,424        | -0,591        |
|                | Adjusted p-value                    | 0,183        | 0,189         | 0,055         | 0,237         | 0,263         | 0,255         | 0,094         |
| hsa_miR_502_3p | Pearson correlation coefficient (r) | <b>0,835</b> | <b>-0,767</b> | <b>-0,864</b> | <b>-0,720</b> | <b>-0,726</b> | <b>-0,703</b> | <b>-0,907</b> |
|                | Adjusted p-value                    | <b>0,005</b> | <b>0,016</b>  | <b>0,003</b>  | <b>0,029</b>  | <b>0,027</b>  | <b>0,035</b>  | <b>0,001</b>  |
| hsa_miR_503    | Pearson correlation coefficient (r) | <b>0,899</b> | <b>-0,909</b> | <b>-0,823</b> | -0,515        | -0,480        | -0,470        | <b>-0,782</b> |
|                | Adjusted p-value                    | <b>0,001</b> | <b>0,001</b>  | <b>0,006</b>  | 0,155         | 0,191         | 0,202         | <b>0,013</b>  |
| hsa_miR_504    | Pearson correlation coefficient (r) | 0,640        | -0,374        | -0,594        | <b>-0,965</b> | <b>-0,950</b> | <b>-0,955</b> | <b>-0,921</b> |
|                | Adjusted p-value                    | 0,122        | 0,408         | 0,160         | <b>0,000</b>  | <b>0,001</b>  | <b>0,001</b>  | <b>0,003</b>  |
| hsa_miR_505    | Pearson correlation coefficient (r) | 0,346        | -0,574        | <b>-0,720</b> | -0,567        | -0,542        | -0,570        | <b>-0,679</b> |
|                | Adjusted p-value                    | 0,361        | 0,106         | <b>0,029</b>  | 0,112         | 0,132         | 0,109         | <b>0,044</b>  |
| hsa_miR_506    | Pearson correlation coefficient (r) | <b>0,898</b> | <b>-0,857</b> | <b>-0,816</b> | -0,534        | -0,480        | -0,487        | <b>-0,773</b> |
|                | Adjusted p-value                    | <b>0,001</b> | <b>0,003</b>  | <b>0,007</b>  | 0,139         | 0,191         | 0,183         | <b>0,015</b>  |
| hsa_miR_508_3p | Pearson correlation coefficient (r) | <b>0,869</b> | <b>-0,895</b> | <b>-0,904</b> | -0,468        | -0,429        | -0,438        | <b>-0,764</b> |

|                  |                                     |               |               |               |              |              |              |               |
|------------------|-------------------------------------|---------------|---------------|---------------|--------------|--------------|--------------|---------------|
|                  | Adjusted p-value                    | <b>0,005</b>  | <b>0,003</b>  | <b>0,002</b>  | 0,243        | 0,289        | 0,278        | <b>0,027</b>  |
| hsa_miR_508_5p   | Pearson correlation coefficient (r) | <b>0,818</b>  | <b>-0,782</b> | <b>-0,807</b> | -0,435       | -0,428       | -0,413       | <b>-0,692</b> |
|                  | Adjusted p-value                    | <b>0,007</b>  | <b>0,013</b>  | <b>0,009</b>  | 0,242        | 0,250        | 0,270        | <b>0,039</b>  |
| hsa_miR_509_3_5p | Pearson correlation coefficient (r) | 0,645         | <b>-0,915</b> | <b>-0,744</b> | -0,424       | -0,311       | -0,348       | <b>-0,685</b> |
|                  | Adjusted p-value                    | 0,061         | <b>0,001</b>  | <b>0,022</b>  | 0,255        | 0,415        | 0,359        | <b>0,042</b>  |
| hsa_miR_509_3p   | Pearson correlation coefficient (r) | <b>0,839</b>  | <b>-0,848</b> | <b>-0,856</b> | -0,479       | -0,463       | -0,457       | <b>-0,737</b> |
|                  | Adjusted p-value                    | <b>0,005</b>  | <b>0,004</b>  | <b>0,003</b>  | 0,192        | 0,210        | 0,217        | <b>0,023</b>  |
| hsa_miR_510      | Pearson correlation coefficient (r) | <b>0,813</b>  | <b>-0,789</b> | <b>-0,755</b> | -0,527       | -0,514       | -0,496       | <b>-0,747</b> |
|                  | Adjusted p-value                    | <b>0,008</b>  | <b>0,012</b>  | <b>0,019</b>  | 0,145        | 0,157        | 0,174        | <b>0,021</b>  |
| hsa_miR_511      | Pearson correlation coefficient (r) | -0,518        | 0,279         | 0,490         | <b>0,995</b> | <b>0,969</b> | <b>0,984</b> | <b>0,900</b>  |
|                  | Adjusted p-value                    | 0,188         | 0,503         | 0,217         | <b>0,000</b> | <b>0,000</b> | <b>0,000</b> | <b>0,002</b>  |
| hsa_miR_512_5p   | Pearson correlation coefficient (r) | <b>-0,785</b> | <b>0,882</b>  | <b>0,907</b>  | <b>0,754</b> | <b>0,713</b> | <b>0,719</b> | <b>0,941</b>  |
|                  | Adjusted p-value                    | <b>0,012</b>  | <b>0,002</b>  | <b>0,001</b>  | <b>0,019</b> | <b>0,031</b> | <b>0,029</b> | <b>0,000</b>  |
| hsa_miR_513a_3p  | Pearson correlation coefficient (r) | <b>0,962</b>  | <b>-0,862</b> | <b>-0,776</b> | -0,487       | -0,464       | -0,442       | <b>-0,746</b> |
|                  | Adjusted p-value                    | <b>0,000</b>  | <b>0,003</b>  | <b>0,014</b>  | 0,184        | 0,209        | 0,234        | <b>0,021</b>  |
| hsa_miR_513a_5p  | Pearson correlation coefficient (r) | <b>0,888</b>  | <b>-0,804</b> | <b>-0,755</b> | -0,437       | -0,413       | -0,403       | <b>-0,683</b> |
|                  | Adjusted p-value                    | <b>0,001</b>  | <b>0,009</b>  | <b>0,019</b>  | 0,240        | 0,269        | 0,283        | <b>0,042</b>  |
| hsa_miR_513c     | Pearson correlation coefficient (r) | <b>0,934</b>  | <b>-0,793</b> | <b>-0,720</b> | -0,440       | -0,401       | -0,396       | <b>-0,675</b> |
|                  | Adjusted p-value                    | <b>0,000</b>  | <b>0,011</b>  | <b>0,029</b>  | 0,236        | 0,285        | 0,292        | <b>0,046</b>  |
| hsa_miR_514      | Pearson correlation coefficient (r) | <b>0,920</b>  | -0,514        | -0,521        | -0,458       | -0,465       | -0,443       | -0,585        |
|                  | Adjusted p-value                    | <b>0,000</b>  | 0,157         | 0,151         | 0,215        | 0,208        | 0,233        | 0,098         |
| hsa_miR_515_3p   | Pearson correlation coefficient (r) | <b>-0,840</b> | <b>0,937</b>  | <b>0,797</b>  | 0,530        | 0,461        | 0,474        | <b>0,781</b>  |
|                  | Adjusted p-value                    | <b>0,005</b>  | <b>0,000</b>  | <b>0,010</b>  | 0,142        | 0,212        | 0,198        | <b>0,013</b>  |
| hsa_miR_515_5p   | Pearson correlation coefficient (r) | <b>-0,678</b> | <b>0,911</b>  | <b>0,926</b>  | 0,542        | 0,521        | 0,533        | <b>0,764</b>  |
|                  | Adjusted p-value                    | <b>0,045</b>  | <b>0,001</b>  | <b>0,000</b>  | 0,132        | 0,151        | 0,140        | <b>0,017</b>  |
| hsa_miR_516a_3p  | Pearson correlation coefficient (r) | <b>-0,806</b> | <b>0,805</b>  | <b>0,792</b>  | 0,592        | 0,620        | 0,571        | <b>0,776</b>  |
|                  | Adjusted p-value                    | <b>0,016</b>  | <b>0,016</b>  | <b>0,019</b>  | 0,122        | 0,101        | 0,139        | <b>0,024</b>  |
| hsa_miR_516a_5p  | Pearson correlation coefficient (r) | -0,644        | <b>0,731</b>  | <b>0,685</b>  | <b>0,750</b> | <b>0,678</b> | <b>0,695</b> | <b>0,838</b>  |
|                  | Adjusted p-value                    | 0,061         | <b>0,025</b>  | <b>0,042</b>  | <b>0,020</b> | <b>0,045</b> | <b>0,038</b> | <b>0,005</b>  |
| hsa_miR_516b     | Pearson correlation coefficient (r) | -0,381        | 0,370         | 0,470         | <b>0,996</b> | <b>0,999</b> | <b>0,999</b> | <b>0,889</b>  |
|                  | Adjusted p-value                    | 0,351         | 0,367         | 0,240         | <b>0,000</b> | <b>0,000</b> | <b>0,000</b> | <b>0,003</b>  |
| hsa_miR_517a     | Pearson correlation coefficient (r) | <b>-0,760</b> | <b>0,848</b>  | <b>0,956</b>  | <b>0,684</b> | <b>0,691</b> | <b>0,672</b> | <b>0,904</b>  |
|                  | Adjusted p-value                    | <b>0,017</b>  | <b>0,004</b>  | <b>0,000</b>  | <b>0,042</b> | <b>0,039</b> | <b>0,047</b> | <b>0,001</b>  |

|                 |                                     |               |              |              |              |              |              |              |
|-----------------|-------------------------------------|---------------|--------------|--------------|--------------|--------------|--------------|--------------|
| hsa_miR_517b    | Pearson correlation coefficient (r) | <b>-0,677</b> | <b>0,819</b> | <b>0,932</b> | <b>0,776</b> | <b>0,744</b> | <b>0,757</b> | <b>0,936</b> |
|                 | Adjusted p-value                    | <b>0,045</b>  | <b>0,007</b> | <b>0,000</b> | <b>0,014</b> | <b>0,021</b> | <b>0,018</b> | <b>0,000</b> |
| hsa_miR_517c    | Pearson correlation coefficient (r) | <b>-0,714</b> | <b>0,695</b> | <b>0,793</b> | <b>0,853</b> | <b>0,860</b> | <b>0,854</b> | <b>0,933</b> |
|                 | Adjusted p-value                    | <b>0,031</b>  | <b>0,038</b> | <b>0,011</b> | <b>0,003</b> | <b>0,003</b> | <b>0,003</b> | <b>0,000</b> |
| hsa_miR_518a_3p | Pearson correlation coefficient (r) | -0,546        | 0,629        | <b>0,897</b> | <b>0,731</b> | <b>0,781</b> | <b>0,756</b> | <b>0,857</b> |
|                 | Adjusted p-value                    | 0,128         | 0,069        | <b>0,001</b> | <b>0,025</b> | <b>0,013</b> | <b>0,019</b> | <b>0,003</b> |
| hsa_miR_518a_5p | Pearson correlation coefficient (r) | -0,587        | <b>0,854</b> | <b>0,890</b> | 0,356        | 0,353        | 0,338        | 0,640        |
|                 | Adjusted p-value                    | 0,126         | <b>0,007</b> | <b>0,003</b> | 0,387        | 0,391        | 0,413        | 0,088        |
| hsa_miR_518b    | Pearson correlation coefficient (r) | <b>-0,755</b> | <b>0,974</b> | <b>0,942</b> | 0,423        | 0,398        | 0,398        | <b>0,752</b> |
|                 | Adjusted p-value                    | <b>0,030</b>  | <b>0,000</b> | <b>0,000</b> | 0,297        | 0,329        | 0,329        | <b>0,031</b> |
| hsa_miR_518c    | Pearson correlation coefficient (r) | <b>-0,769</b> | <b>0,948</b> | <b>0,944</b> | 0,560        | 0,518        | 0,530        | <b>0,824</b> |
|                 | Adjusted p-value                    | <b>0,015</b>  | <b>0,000</b> | <b>0,000</b> | 0,117        | 0,153        | 0,142        | <b>0,006</b> |
| hsa_miR_518c#   | Pearson correlation coefficient (r) | <b>-0,722</b> | <b>0,835</b> | <b>0,975</b> | 0,591        | 0,615        | 0,606        | <b>0,841</b> |
|                 | Adjusted p-value                    | <b>0,043</b>  | <b>0,010</b> | <b>0,000</b> | 0,123        | 0,104        | 0,111        | <b>0,009</b> |
| hsa_miR_518d_5p | Pearson correlation coefficient (r) | -0,534        | <b>0,762</b> | <b>0,784</b> | 0,662        | 0,590        | 0,655        | 0,750        |
|                 | Adjusted p-value                    | 0,217         | <b>0,047</b> | <b>0,037</b> | 0,105        | 0,163        | 0,111        | 0,052        |
| hsa_miR_518e    | Pearson correlation coefficient (r) | -0,578        | <b>0,728</b> | <b>0,886</b> | <b>0,817</b> | <b>0,781</b> | <b>0,805</b> | <b>0,924</b> |
|                 | Adjusted p-value                    | 0,103         | <b>0,026</b> | <b>0,001</b> | <b>0,007</b> | <b>0,013</b> | <b>0,009</b> | <b>0,000</b> |
| hsa_miR_518e#   | Pearson correlation coefficient (r) | <b>-0,785</b> | <b>0,932</b> | <b>0,951</b> | <b>0,714</b> | <b>0,714</b> | <b>0,719</b> | <b>0,903</b> |
|                 | Adjusted p-value                    | <b>0,021</b>  | <b>0,001</b> | <b>0,000</b> | <b>0,047</b> | <b>0,047</b> | <b>0,044</b> | <b>0,002</b> |
| hsa_miR_518f    | Pearson correlation coefficient (r) | <b>-0,714</b> | <b>0,824</b> | <b>0,944</b> | <b>0,765</b> | <b>0,761</b> | <b>0,759</b> | <b>0,932</b> |
|                 | Adjusted p-value                    | <b>0,031</b>  | <b>0,006</b> | <b>0,000</b> | <b>0,016</b> | <b>0,017</b> | <b>0,018</b> | <b>0,000</b> |
| hsa_miR_518f#   | Pearson correlation coefficient (r) | -0,586        | <b>0,868</b> | <b>0,966</b> | 0,524        | 0,511        | 0,528        | <b>0,749</b> |
|                 | Adjusted p-value                    | 0,098         | <b>0,002</b> | <b>0,000</b> | 0,147        | 0,159        | 0,144        | <b>0,020</b> |
| hsa_miR_519a    | Pearson correlation coefficient (r) | -0,627        | <b>0,755</b> | <b>0,910</b> | <b>0,800</b> | <b>0,773</b> | <b>0,784</b> | <b>0,937</b> |
|                 | Adjusted p-value                    | 0,070         | <b>0,019</b> | <b>0,001</b> | <b>0,010</b> | <b>0,015</b> | <b>0,012</b> | <b>0,000</b> |
| hsa_miR_519b_3p | Pearson correlation coefficient (r) | <b>-0,686</b> | <b>0,810</b> | <b>0,978</b> | 0,609        | 0,649        | 0,626        | <b>0,832</b> |
|                 | Adjusted p-value                    | <b>0,041</b>  | <b>0,008</b> | <b>0,000</b> | 0,082        | 0,058        | 0,071        | <b>0,005</b> |
| hsa_miR_519c_3p | Pearson correlation coefficient (r) | <b>-0,674</b> | <b>0,679</b> | <b>0,881</b> | <b>0,845</b> | <b>0,875</b> | <b>0,857</b> | <b>0,955</b> |
|                 | Adjusted p-value                    | <b>0,046</b>  | <b>0,044</b> | <b>0,002</b> | <b>0,004</b> | <b>0,002</b> | <b>0,003</b> | <b>0,000</b> |
| hsa_miR_519d    | Pearson correlation coefficient (r) | -0,640        | <b>0,861</b> | <b>0,895</b> | 0,193        | 0,219        | 0,199        | 0,534        |
|                 | Adjusted p-value                    | 0,064         | <b>0,003</b> | <b>0,001</b> | 0,618        | 0,572        | 0,607        | 0,138        |
| hsa_miR_519e    | Pearson correlation coefficient (r) | <b>-0,736</b> | <b>0,777</b> | <b>0,917</b> | 0,641        | 0,666        | 0,630        | <b>0,868</b> |

|                 |                                     |               |              |              |              |              |              |              |
|-----------------|-------------------------------------|---------------|--------------|--------------|--------------|--------------|--------------|--------------|
|                 | Adjusted p-value                    | <b>0,024</b>  | <b>0,014</b> | <b>0,001</b> | 0,063        | 0,050        | 0,069        | <b>0,002</b> |
| hsa_miR_519e#   | Pearson correlation coefficient (r) | -0,665        | <b>0,878</b> | <b>0,939</b> | 0,598        | 0,543        | 0,569        | <b>0,829</b> |
|                 | Adjusted p-value                    | 0,051         | <b>0,002</b> | <b>0,000</b> | 0,089        | 0,131        | 0,110        | <b>0,006</b> |
| hsa_miR_520a_3p | Pearson correlation coefficient (r) | -0,569        | 0,556        | <b>0,772</b> | <b>0,733</b> | <b>0,779</b> | <b>0,736</b> | <b>0,837</b> |
|                 | Adjusted p-value                    | 0,109         | 0,120        | <b>0,015</b> | <b>0,025</b> | <b>0,013</b> | <b>0,024</b> | <b>0,005</b> |
| hsa_miR_520a_5p | Pearson correlation coefficient (r) | -0,612        | <b>0,742</b> | <b>0,939</b> | <b>0,757</b> | <b>0,771</b> | <b>0,767</b> | <b>0,899</b> |
|                 | Adjusted p-value                    | 0,080         | <b>0,022</b> | <b>0,000</b> | <b>0,018</b> | <b>0,015</b> | <b>0,016</b> | <b>0,001</b> |
| hsa_miR_520b    | Pearson correlation coefficient (r) | -0,664        | <b>0,894</b> | <b>0,992</b> | 0,494        | 0,491        | 0,494        | <b>0,763</b> |
|                 | Adjusted p-value                    | 0,051         | <b>0,001</b> | <b>0,000</b> | 0,176        | 0,180        | 0,177        | <b>0,017</b> |
| hsa_miR_520c_3p | Pearson correlation coefficient (r) | <b>-0,694</b> | <b>0,879</b> | <b>0,992</b> | 0,562        | 0,576        | 0,566        | <b>0,810</b> |
|                 | Adjusted p-value                    | <b>0,038</b>  | <b>0,002</b> | <b>0,000</b> | 0,115        | 0,105        | 0,112        | <b>0,008</b> |
| hsa_miR_520d_5p | Pearson correlation coefficient (r) | -0,687        | <b>0,948</b> | <b>0,933</b> | <b>0,824</b> | <b>0,828</b> | <b>0,832</b> | <b>0,933</b> |
|                 | Adjusted p-value                    | 0,132         | <b>0,004</b> | <b>0,007</b> | <b>0,044</b> | <b>0,042</b> | <b>0,040</b> | <b>0,007</b> |
| hsa_miR_520e    | Pearson correlation coefficient (r) | -0,583        | <b>0,741</b> | <b>0,924</b> | 0,467        | 0,540        | 0,511        | <b>0,684</b> |
|                 | Adjusted p-value                    | 0,100         | <b>0,022</b> | <b>0,000</b> | 0,205        | 0,133        | 0,160        | <b>0,042</b> |
| hsa_miR_520f    | Pearson correlation coefficient (r) | -0,626        | <b>0,813</b> | <b>0,995</b> | 0,589        | 0,615        | 0,606        | <b>0,812</b> |
|                 | Adjusted p-value                    | 0,071         | <b>0,008</b> | <b>0,000</b> | 0,095        | 0,078        | 0,084        | <b>0,008</b> |
| hsa_miR_520g    | Pearson correlation coefficient (r) | -0,662        | <b>0,860</b> | <b>0,996</b> | 0,569        | 0,569        | 0,565        | <b>0,818</b> |
|                 | Adjusted p-value                    | 0,052         | <b>0,003</b> | <b>0,000</b> | 0,110        | 0,109        | 0,113        | <b>0,007</b> |
| hsa_miR_520h    | Pearson correlation coefficient (r) | -0,769        | <b>0,979</b> | <b>0,933</b> | 0,782        | 0,772        | 0,760        | <b>0,946</b> |
|                 | Adjusted p-value                    | 0,074         | <b>0,001</b> | <b>0,007</b> | 0,066        | 0,072        | 0,079        | <b>0,004</b> |
| hsa_miR_521     | Pearson correlation coefficient (r) | -0,526        | 0,340        | 0,544        | <b>0,947</b> | <b>0,950</b> | <b>0,933</b> | <b>0,909</b> |
|                 | Adjusted p-value                    | 0,146         | 0,371        | 0,130        | <b>0,000</b> | <b>0,000</b> | <b>0,000</b> | <b>0,001</b> |
| hsa_miR_522     | Pearson correlation coefficient (r) | <b>-0,734</b> | <b>0,821</b> | <b>0,710</b> | <b>0,716</b> | 0,642        | 0,664        | <b>0,835</b> |
|                 | Adjusted p-value                    | <b>0,024</b>  | <b>0,007</b> | <b>0,032</b> | <b>0,030</b> | 0,062        | 0,051        | <b>0,005</b> |
| hsa_miR_523     | Pearson correlation coefficient (r) | <b>-0,751</b> | <b>0,884</b> | <b>0,677</b> | 0,544        | 0,439        | 0,477        | <b>0,737</b> |
|                 | Adjusted p-value                    | <b>0,020</b>  | <b>0,002</b> | <b>0,045</b> | 0,130        | 0,237        | 0,195        | <b>0,023</b> |
| hsa_miR_524_3p  | Pearson correlation coefficient (r) | -0,653        | <b>0,963</b> | <b>0,882</b> | 0,356        | 0,313        | 0,321        | 0,630        |
|                 | Adjusted p-value                    | 0,112         | <b>0,000</b> | <b>0,009</b> | 0,434        | 0,495        | 0,483        | 0,129        |
| hsa_miR_524_5p  | Pearson correlation coefficient (r) | -0,642        | <b>0,950</b> | <b>0,717</b> | 0,154        | 0,066        | 0,098        | 0,455        |
|                 | Adjusted p-value                    | 0,062         | <b>0,000</b> | <b>0,030</b> | 0,693        | 0,866        | 0,803        | 0,218        |
| hsa_miR_525_3p  | Pearson correlation coefficient (r) | <b>-0,768</b> | <b>0,817</b> | <b>0,779</b> | 0,260        | 0,285        | 0,235        | 0,590        |
|                 | Adjusted p-value                    | <b>0,016</b>  | <b>0,007</b> | <b>0,013</b> | 0,499        | 0,457        | 0,544        | 0,094        |

|                |                                     |               |               |               |               |               |               |               |
|----------------|-------------------------------------|---------------|---------------|---------------|---------------|---------------|---------------|---------------|
| hsa_miR_525_5p | Pearson correlation coefficient (r) | -0,688        | <b>0,719</b>  | <b>0,841</b>  | <b>0,776</b>  | <b>0,808</b>  | <b>0,776</b>  | <b>0,905</b>  |
|                | Adjusted p-value                    | 0,059         | <b>0,044</b>  | <b>0,009</b>  | <b>0,023</b>  | <b>0,015</b>  | <b>0,024</b>  | <b>0,002</b>  |
| hsa_miR_526b   | Pearson correlation coefficient (r) | -0,637        | <b>0,759</b>  | 0,667         | <b>0,697</b>  | 0,562         | 0,612         | <b>0,823</b>  |
|                | Adjusted p-value                    | 0,065         | <b>0,018</b>  | 0,050         | <b>0,037</b>  | 0,116         | 0,080         | <b>0,006</b>  |
| hsa_miR_526b#  | Pearson correlation coefficient (r) | <b>-0,699</b> | <b>0,954</b>  | <b>0,962</b>  | 0,442         | 0,416         | 0,423         | <b>0,729</b>  |
|                | Adjusted p-value                    | <b>0,036</b>  | <b>0,000</b>  | <b>0,000</b>  | 0,234         | 0,265         | 0,257         | <b>0,026</b>  |
| hsa_miR_532_3p | Pearson correlation coefficient (r) | <b>0,887</b>  | <b>-0,751</b> | <b>-0,851</b> | <b>-0,716</b> | <b>-0,717</b> | <b>-0,704</b> | <b>-0,892</b> |
|                | Adjusted p-value                    | <b>0,001</b>  | <b>0,020</b>  | <b>0,004</b>  | <b>0,030</b>  | <b>0,030</b>  | <b>0,034</b>  | <b>0,001</b>  |
| hsa_miR_532_5p | Pearson correlation coefficient (r) | <b>0,722</b>  | <b>-0,812</b> | <b>-0,868</b> | <b>-0,694</b> | -0,663        | -0,655        | <b>-0,883</b> |
|                | Adjusted p-value                    | <b>0,028</b>  | <b>0,008</b>  | <b>0,002</b>  | <b>0,038</b>  | 0,051         | 0,055         | <b>0,002</b>  |
| hsa_miR_542_5p | Pearson correlation coefficient (r) | 0,566         | <b>-0,863</b> | -0,654        | -0,463        | -0,355        | -0,382        | <b>-0,672</b> |
|                | Adjusted p-value                    | 0,112         | <b>0,003</b>  | 0,056         | 0,210         | 0,348         | 0,310         | <b>0,047</b>  |
| hsa_miR_543    | Pearson correlation coefficient (r) | <b>0,738</b>  | <b>-0,732</b> | <b>-0,732</b> | -0,426        | -0,377        | -0,398        | -0,622        |
|                | Adjusted p-value                    | <b>0,023</b>  | <b>0,025</b>  | <b>0,025</b>  | 0,253         | 0,317         | 0,289         | 0,073         |
| hsa_miR_545    | Pearson correlation coefficient (r) | 0,345         | -0,490        | -0,436        | 0,104         | 0,101         | 0,144         | -0,210        |
|                | Adjusted p-value                    | 0,363         | 0,181         | 0,241         | 0,791         | 0,797         | 0,712         | 0,588         |
| hsa_miR_548o   | Pearson correlation coefficient (r) | 0,363         | -0,069        | -0,163        | <b>-0,774</b> | <b>-0,767</b> | <b>-0,770</b> | -0,633        |
|                | Adjusted p-value                    | 0,336         | 0,861         | 0,675         | <b>0,014</b>  | <b>0,016</b>  | <b>0,015</b>  | 0,067         |
| hsa_miR_550    | Pearson correlation coefficient (r) | -0,759        | <b>0,977</b>  | <b>0,971</b>  | 0,541         | 0,543         | 0,543         | 0,763         |
|                | Adjusted p-value                    | 0,080         | <b>0,001</b>  | <b>0,001</b>  | 0,268         | 0,266         | 0,265         | 0,078         |
| hsa_miR_550#   | Pearson correlation coefficient (r) | <b>-0,679</b> | <b>0,734</b>  | 0,566         | 0,567         | 0,445         | 0,479         | <b>0,704</b>  |
|                | Adjusted p-value                    | <b>0,044</b>  | <b>0,024</b>  | 0,112         | 0,111         | 0,230         | 0,192         | <b>0,034</b>  |
| hsa_miR_551a   | Pearson correlation coefficient (r) | 0,034         | 0,050         | -0,262        | <b>-0,819</b> | <b>-0,822</b> | <b>-0,825</b> | -0,673        |
|                | Adjusted p-value                    | 0,936         | 0,907         | 0,531         | <b>0,013</b>  | <b>0,012</b>  | <b>0,012</b>  | 0,067         |
| hsa_miR_551b   | Pearson correlation coefficient (r) | -0,518        | 0,496         | <b>0,815</b>  | <b>0,782</b>  | <b>0,854</b>  | <b>0,828</b>  | <b>0,852</b>  |
|                | Adjusted p-value                    | 0,189         | 0,211         | <b>0,014</b>  | <b>0,022</b>  | <b>0,007</b>  | <b>0,011</b>  | <b>0,007</b>  |
| hsa_miR_566    | Pearson correlation coefficient (r) | -0,475        | 0,201         | 0,361         | <b>0,869</b>  | <b>0,880</b>  | <b>0,879</b>  | 0,737         |
|                | Adjusted p-value                    | 0,281         | 0,665         | 0,426         | <b>0,011</b>  | <b>0,009</b>  | <b>0,009</b>  | 0,059         |
| hsa_miR_574_3p | Pearson correlation coefficient (r) | <b>0,821</b>  | <b>-0,926</b> | <b>-0,862</b> | <b>-0,668</b> | -0,593        | -0,616        | <b>-0,879</b> |
|                | Adjusted p-value                    | <b>0,007</b>  | <b>0,000</b>  | <b>0,003</b>  | <b>0,049</b>  | 0,093         | 0,077         | <b>0,002</b>  |
| hsa_miR_582_5p | Pearson correlation coefficient (r) | <b>0,750</b>  | <b>-0,867</b> | <b>-0,861</b> | -0,489        | -0,467        | -0,463        | <b>-0,753</b> |
|                | Adjusted p-value                    | <b>0,020</b>  | <b>0,002</b>  | <b>0,003</b>  | 0,182         | 0,205         | 0,209         | <b>0,019</b>  |
| hsa_miR_584    | Pearson correlation coefficient (r) | 0,624         | -0,342        | -0,560        | -0,650        | -0,670        | -0,645        | -0,688        |

|                |                                     |              |               |               |              |              |              |               |
|----------------|-------------------------------------|--------------|---------------|---------------|--------------|--------------|--------------|---------------|
|                | Adjusted p-value                    | 0,098        | 0,407         | 0,149         | 0,081        | 0,069        | 0,084        | 0,059         |
| hsa_miR_590_5p | Pearson correlation coefficient (r) | 0,243        | -0,176        | -0,103        | 0,180        | 0,190        | 0,236        | -0,014        |
|                | Adjusted p-value                    | 0,528        | 0,651         | 0,792         | 0,643        | 0,624        | 0,540        | 0,971         |
| hsa_miR_597    | Pearson correlation coefficient (r) | 0,662        | <b>-0,945</b> | <b>-0,927</b> | -0,530       | -0,495       | -0,500       | <b>-0,795</b> |
|                | Adjusted p-value                    | 0,052        | <b>0,000</b>  | <b>0,000</b>  | 0,142        | 0,175        | 0,171        | <b>0,010</b>  |
| hsa_miR_598    | Pearson correlation coefficient (r) | <b>0,805</b> | -0,650        | -0,641        | -0,187       | -0,181       | -0,155       | -0,459        |
|                | Adjusted p-value                    | <b>0,009</b> | 0,058         | 0,063         | 0,630        | 0,642        | 0,690        | 0,214         |
| hsa_miR_605    | Pearson correlation coefficient (r) | -0,511       | 0,436         | 0,469         | 0,165        | 0,282        | 0,206        | 0,331         |
|                | Adjusted p-value                    | 0,160        | 0,241         | 0,203         | 0,672        | 0,462        | 0,595        | 0,384         |
| hsa_miR_615_3p | Pearson correlation coefficient (r) | -0,458       | -0,140        | -0,224        | 0,409        | 0,406        | 0,388        | 0,282         |
|                | Adjusted p-value                    | 0,301        | 0,765         | 0,630         | 0,362        | 0,366        | 0,389        | 0,540         |
| hsa_miR_625#   | Pearson correlation coefficient (r) | -0,362       | 0,327         | 0,593         | <b>0,951</b> | <b>0,954</b> | <b>0,973</b> | <b>0,859</b>  |
|                | Adjusted p-value                    | 0,338        | 0,390         | 0,092         | <b>0,000</b> | <b>0,000</b> | <b>0,000</b> | <b>0,003</b>  |
| hsa_miR_628_3p | Pearson correlation coefficient (r) | -0,664       | 0,519         | 0,386         | <b>0,684</b> | 0,578        | 0,590        | <b>0,731</b>  |
|                | Adjusted p-value                    | 0,051        | 0,152         | 0,305         | <b>0,042</b> | 0,103        | 0,095        | <b>0,025</b>  |
| hsa_miR_629    | Pearson correlation coefficient (r) | -0,455       | 0,354         | 0,602         | <b>0,844</b> | <b>0,834</b> | <b>0,847</b> | <b>0,838</b>  |
|                | Adjusted p-value                    | 0,218        | 0,350         | 0,086         | <b>0,004</b> | <b>0,005</b> | <b>0,004</b> | <b>0,005</b>  |
| hsa_miR_643    | Pearson correlation coefficient (r) | -0,529       | 0,509         | 0,536         | <b>0,947</b> | <b>0,929</b> | <b>0,914</b> | <b>0,943</b>  |
|                | Adjusted p-value                    | 0,177        | 0,198         | 0,171         | <b>0,000</b> | <b>0,001</b> | <b>0,002</b> | <b>0,000</b>  |
| hsa_miR_651    | Pearson correlation coefficient (r) | 0,204        | -0,422        | -0,368        | -0,196       | -0,195       | -0,147       | -0,384        |
|                | Adjusted p-value                    | 0,598        | 0,258         | 0,329         | 0,612        | 0,614        | 0,706        | 0,308         |
| hsa_miR_652    | Pearson correlation coefficient (r) | 0,609        | <b>-0,894</b> | <b>-0,794</b> | -0,365       | -0,315       | -0,319       | -0,639        |
|                | Adjusted p-value                    | 0,082        | <b>0,001</b>  | <b>0,011</b>  | 0,334        | 0,409        | 0,403        | 0,064         |
| hsa_miR_654_3p | Pearson correlation coefficient (r) | 0,459        | <b>-0,735</b> | -0,576        | -0,215       | -0,124       | -0,159       | -0,454        |
|                | Adjusted p-value                    | 0,214        | <b>0,024</b>  | 0,105         | 0,578        | 0,751        | 0,682        | 0,220         |
| hsa_miR_654_5p | Pearson correlation coefficient (r) | 0,408        | -0,549        | -0,381        | -0,208       | -0,107       | -0,166       | -0,340        |
|                | Adjusted p-value                    | 0,275        | 0,126         | 0,312         | 0,592        | 0,784        | 0,670        | 0,370         |
| hsa_miR_660    | Pearson correlation coefficient (r) | <b>0,764</b> | <b>-0,905</b> | <b>-0,848</b> | -0,381       | -0,338       | -0,330       | <b>-0,695</b> |
|                | Adjusted p-value                    | <b>0,017</b> | <b>0,001</b>  | <b>0,004</b>  | 0,312        | 0,373        | 0,385        | <b>0,038</b>  |
| hsa_miR_663    | Pearson correlation coefficient (r) | 0,250        | 0,185         | 0,163         | 0,337        | 0,205        | 0,294        | 0,279         |
|                | Adjusted p-value                    | 0,551        | 0,661         | 0,700         | 0,415        | 0,627        | 0,480        | 0,504         |
| hsa_miR_664    | Pearson correlation coefficient (r) | <b>0,824</b> | <b>-0,683</b> | <b>-0,774</b> | -0,599       | -0,566       | -0,581       | <b>-0,751</b> |
|                | Adjusted p-value                    | <b>0,006</b> | <b>0,043</b>  | <b>0,014</b>  | 0,088        | 0,112        | 0,101        | <b>0,020</b>  |



|                |                                     |               |               |               |              |              |              |               |
|----------------|-------------------------------------|---------------|---------------|---------------|--------------|--------------|--------------|---------------|
| hsa_miR_675#   | Pearson correlation coefficient (r) | 0,492         | -0,409        | -0,279        | -0,127       | -0,098       | -0,065       | -0,329        |
|                | Adjusted p-value                    | 0,262         | 0,362         | 0,544         | 0,786        | 0,835        | 0,890        | 0,471         |
| hsa_miR_7      | Pearson correlation coefficient (r) | <b>-0,767</b> | <b>0,952</b>  | <b>0,870</b>  | 0,360        | 0,331        | 0,332        | <b>0,670</b>  |
|                | Adjusted p-value                    | <b>0,016</b>  | <b>0,000</b>  | <b>0,002</b>  | 0,341        | 0,384        | 0,382        | <b>0,048</b>  |
| hsa_miR_708    | Pearson correlation coefficient (r) | 0,619         | -0,655        | <b>-0,686</b> | -0,549       | -0,503       | -0,512       | <b>-0,703</b> |
|                | Adjusted p-value                    | 0,075         | 0,055         | <b>0,041</b>  | 0,126        | 0,168        | 0,158        | <b>0,035</b>  |
| hsa_miR_708#   | Pearson correlation coefficient (r) | 0,079         | 0,181         | -0,016        | -0,446       | -0,447       | -0,403       | -0,434        |
|                | Adjusted p-value                    | 0,899         | 0,771         | 0,980         | 0,451        | 0,450        | 0,501        | 0,465         |
| hsa_miR_7_1#   | Pearson correlation coefficient (r) | -0,563        | <b>0,758</b>  | <b>0,962</b>  | 0,442        | 0,470        | 0,454        | <b>0,705</b>  |
|                | Adjusted p-value                    | 0,114         | <b>0,018</b>  | <b>0,000</b>  | 0,233        | 0,201        | 0,220        | <b>0,034</b>  |
| hsa_miR_720    | Pearson correlation coefficient (r) | -0,358        | 0,181         | 0,348         | 0,112        | 0,285        | 0,186        | 0,223         |
|                | Adjusted p-value                    | 0,344         | 0,642         | 0,359         | 0,775        | 0,458        | 0,632        | 0,563         |
| hsa_miR_744    | Pearson correlation coefficient (r) | 0,649         | <b>-0,870</b> | <b>-0,784</b> | -0,494       | -0,432       | -0,442       | <b>-0,749</b> |
|                | Adjusted p-value                    | 0,059         | <b>0,002</b>  | <b>0,012</b>  | 0,176        | 0,246        | 0,234        | <b>0,020</b>  |
| hsa_miR_744#   | Pearson correlation coefficient (r) | 0,429         | -0,481        | <b>-0,767</b> | -0,307       | -0,356       | -0,355       | -0,525        |
|                | Adjusted p-value                    | 0,336         | 0,275         | <b>0,044</b>  | 0,503        | 0,433        | 0,435        | 0,226         |
| hsa_miR_760    | Pearson correlation coefficient (r) | 0,237         | 0,196         | 0,208         | -0,290       | -0,232       | -0,255       | -0,133        |
|                | Adjusted p-value                    | 0,609         | 0,673         | 0,654         | 0,528        | 0,617        | 0,580        | 0,777         |
| hsa_miR_766    | Pearson correlation coefficient (r) | <b>0,698</b>  | <b>-0,706</b> | <b>-0,668</b> | -0,588       | -0,537       | -0,548       | <b>-0,755</b> |
|                | Adjusted p-value                    | <b>0,036</b>  | <b>0,034</b>  | <b>0,049</b>  | 0,096        | 0,136        | 0,126        | <b>0,019</b>  |
| hsa_miR_769_3p | Pearson correlation coefficient (r) | 0,364         | -0,207        | 0,071         | 0,259        | 0,340        | 0,308        | 0,152         |
|                | Adjusted p-value                    | 0,375         | 0,623         | 0,867         | 0,536        | 0,410        | 0,458        | 0,719         |
| hsa_miR_769_5p | Pearson correlation coefficient (r) | -0,506        | 0,502         | 0,654         | <b>0,757</b> | <b>0,728</b> | <b>0,753</b> | <b>0,757</b>  |
|                | Adjusted p-value                    | 0,165         | 0,168         | 0,056         | <b>0,018</b> | <b>0,026</b> | <b>0,019</b> | <b>0,018</b>  |
| hsa_miR_873    | Pearson correlation coefficient (r) | 0,460         | -0,629        | -0,530        | -0,270       | -0,246       | -0,229       | -0,464        |
|                | Adjusted p-value                    | 0,213         | 0,069         | 0,143         | 0,482        | 0,524        | 0,553        | 0,209         |
| hsa_miR_876_3p | Pearson correlation coefficient (r) | <b>0,819</b>  | <b>-0,773</b> | -0,587        | -0,065       | -0,046       | -0,013       | -0,384        |
|                | Adjusted p-value                    | <b>0,013</b>  | <b>0,024</b>  | 0,126         | 0,878        | 0,914        | 0,975        | 0,348         |
| hsa_miR_876_5p | Pearson correlation coefficient (r) | <b>0,735</b>  | <b>-0,871</b> | -0,688        | -0,064       | -0,018       | -0,012       | -0,402        |
|                | Adjusted p-value                    | <b>0,038</b>  | <b>0,005</b>  | 0,059         | 0,881        | 0,967        | 0,977        | 0,323         |
| hsa_miR_885_5p | Pearson correlation coefficient (r) | -0,615        | 0,567         | <b>0,819</b>  | <b>0,861</b> | <b>0,901</b> | <b>0,884</b> | <b>0,935</b>  |
|                | Adjusted p-value                    | 0,078         | 0,111         | <b>0,007</b>  | <b>0,003</b> | <b>0,001</b> | <b>0,002</b> | <b>0,000</b>  |
| hsa_miR_886_3p | Pearson correlation coefficient (r) | 0,651         | <b>-0,722</b> | <b>-0,803</b> | -0,487       | -0,489       | -0,490       | -0,664        |

|                |                                     |               |               |               |              |              |              |               |
|----------------|-------------------------------------|---------------|---------------|---------------|--------------|--------------|--------------|---------------|
|                | Adjusted p-value                    | 0,057         | <b>0,028</b>  | <b>0,009</b>  | 0,183        | 0,182        | 0,181        | 0,051         |
| hsa_miR_886_5p | Pearson correlation coefficient (r) | 0,086         | 0,046         | 0,159         | 0,025        | 0,152        | 0,083        | 0,089         |
|                | Adjusted p-value                    | 0,825         | 0,907         | 0,683         | 0,950        | 0,697        | 0,831        | 0,820         |
| hsa_miR_887    | Pearson correlation coefficient (r) | 0,159         | -0,263        | -0,128        | -0,440       | -0,382       | -0,407       | -0,417        |
|                | Adjusted p-value                    | 0,707         | 0,528         | 0,763         | 0,275        | 0,350        | 0,316        | 0,304         |
| hsa_miR_888    | Pearson correlation coefficient (r) | -0,325        | 0,345         | 0,461         | <b>0,973</b> | <b>0,984</b> | <b>0,991</b> | <b>0,846</b>  |
|                | Adjusted p-value                    | 0,432         | 0,403         | 0,250         | <b>0,000</b> | <b>0,000</b> | <b>0,000</b> | <b>0,008</b>  |
| hsa_miR_891a   | Pearson correlation coefficient (r) | <b>-0,772</b> | <b>0,819</b>  | 0,519         | 0,409        | 0,364        | 0,363        | 0,592         |
|                | Adjusted p-value                    | <b>0,042</b>  | <b>0,024</b>  | 0,233         | 0,362        | 0,423        | 0,423        | 0,162         |
| hsa_miR_9      | Pearson correlation coefficient (r) | -0,541        | 0,416         | 0,694         | <b>0,693</b> | <b>0,802</b> | <b>0,741</b> | <b>0,749</b>  |
|                | Adjusted p-value                    | 0,133         | 0,265         | 0,038         | <b>0,039</b> | <b>0,009</b> | <b>0,022</b> | <b>0,020</b>  |
| hsa_miR_92a    | Pearson correlation coefficient (r) | <b>0,688</b>  | <b>-0,886</b> | <b>-0,864</b> | -0,532       | -0,480       | -0,499       | <b>-0,773</b> |
|                | Adjusted p-value                    | <b>0,041</b>  | <b>0,001</b>  | <b>0,003</b>  | 0,140        | 0,191        | 0,171        | <b>0,015</b>  |
| hsa_miR_92b    | Pearson correlation coefficient (r) | -0,346        | 0,064         | -0,098        | 0,174        | 0,176        | 0,170        | 0,087         |
|                | Adjusted p-value                    | 0,361         | 0,869         | 0,802         | 0,655        | 0,650        | 0,662        | 0,823         |
| hsa_miR_92b#   | Pearson correlation coefficient (r) | -0,127        | 0,433         | 0,418         | 0,186        | 0,102        | 0,153        | 0,264         |
|                | Adjusted p-value                    | 0,744         | 0,244         | 0,262         | 0,631        | 0,793        | 0,694        | 0,493         |
| hsa_miR_93     | Pearson correlation coefficient (r) | -0,563        | 0,559         | <b>0,767</b>  | 0,535        | 0,628        | 0,577        | <b>0,704</b>  |
|                | Adjusted p-value                    | 0,114         | 0,118         | <b>0,016</b>  | 0,138        | 0,070        | 0,104        | <b>0,034</b>  |
| hsa_miR_93#    | Pearson correlation coefficient (r) | -0,361        | 0,448         | 0,451         | -0,033       | -0,009       | -0,017       | 0,201         |
|                | Adjusted p-value                    | 0,340         | 0,227         | 0,224         | 0,933        | 0,982        | 0,964        | 0,605         |
| hsa_miR_940    | Pearson correlation coefficient (r) | 0,597         | -0,132        | -0,084        | 0,085        | 0,064        | 0,112        | -0,040        |
|                | Adjusted p-value                    | 0,118         | 0,756         | 0,842         | 0,841        | 0,880        | 0,791        | 0,925         |
| hsa_miR_941    | Pearson correlation coefficient (r) | 0,651         | -0,530        | -0,380        | -0,390       | -0,327       | -0,347       | -0,497        |
|                | Adjusted p-value                    | 0,058         | 0,142         | 0,313         | 0,299        | 0,391        | 0,360        | 0,174         |
| hsa_miR_95     | Pearson correlation coefficient (r) | -0,065        | -0,187        | 0,164         | 0,100        | 0,291        | 0,203        | 0,079         |
|                | Adjusted p-value                    | 0,869         | 0,630         | 0,674         | 0,798        | 0,447        | 0,601        | 0,839         |
| hsa_miR_96     | Pearson correlation coefficient (r) | -0,515        | 0,390         | 0,667         | <b>0,888</b> | <b>0,956</b> | <b>0,926</b> | <b>0,871</b>  |
|                | Adjusted p-value                    | 0,156         | 0,299         | 0,050         | <b>0,001</b> | <b>0,000</b> | <b>0,000</b> | <b>0,002</b>  |
| hsa_miR_98     | Pearson correlation coefficient (r) | <b>0,774</b>  | <b>-0,788</b> | <b>-0,781</b> | -0,556       | -0,486       | -0,506       | <b>-0,770</b> |
|                | Adjusted p-value                    | <b>0,014</b>  | <b>0,012</b>  | <b>0,013</b>  | 0,120        | 0,185        | 0,165        | <b>0,015</b>  |
| hsa_miR_99a    | Pearson correlation coefficient (r) | 0,658         | <b>-0,904</b> | <b>-0,832</b> | -0,590       | -0,498       | -0,529       | <b>-0,807</b> |
|                | Adjusted p-value                    | 0,054         | <b>0,001</b>  | <b>0,005</b>  | 0,094        | 0,172        | 0,143        | <b>0,008</b>  |

|                   |                                     |               |               |               |               |               |               |               |
|-------------------|-------------------------------------|---------------|---------------|---------------|---------------|---------------|---------------|---------------|
| hsa_miR_99a#      | Pearson correlation coefficient (r) | 0,595         | <b>-0,822</b> | <b>-0,746</b> | <b>-0,716</b> | -0,605        | -0,648        | <b>-0,859</b> |
|                   | Adjusted p-value                    | 0,091         | <b>0,007</b>  | <b>0,021</b>  | <b>0,030</b>  | 0,084         | 0,059         | <b>0,003</b>  |
| hsa_miR_99b       | Pearson correlation coefficient (r) | <b>0,743</b>  | <b>-0,826</b> | <b>-0,847</b> | -0,646        | -0,596        | -0,611        | <b>-0,845</b> |
|                   | Adjusted p-value                    | <b>0,022</b>  | <b>0,006</b>  | <b>0,004</b>  | 0,060         | 0,090         | 0,081         | <b>0,004</b>  |
| hsa_miR_99b#      | Pearson correlation coefficient (r) | <b>0,692</b>  | <b>-0,679</b> | <b>-0,885</b> | <b>-0,722</b> | <b>-0,744</b> | <b>-0,737</b> | <b>-0,867</b> |
|                   | Adjusted p-value                    | <b>0,039</b>  | <b>0,044</b>  | <b>0,002</b>  | <b>0,028</b>  | <b>0,021</b>  | <b>0,024</b>  | <b>0,002</b>  |
| hsa_miR_505#      | Pearson correlation coefficient (r) | 0,455         | -0,685        | <b>-0,908</b> | <b>-0,912</b> | <b>-0,877</b> | <b>-0,882</b> | <b>-0,938</b> |
|                   | Adjusted p-value                    | 0,365         | 0,133         | <b>0,012</b>  | <b>0,011</b>  | <b>0,022</b>  | <b>0,020</b>  | <b>0,006</b>  |
| hsa_miR_629#      | Pearson correlation coefficient (r) | -0,496        | <b>0,839</b>  | <b>0,858</b>  | 0,176         | 0,161         | 0,146         | 0,498         |
|                   | Adjusted p-value                    | 0,317         | <b>0,037</b>  | <b>0,029</b>  | 0,739         | 0,761         | 0,783         | 0,314         |
| hsa_miR_661       | Pearson correlation coefficient (r) | -0,761        | 0,686         | 0,556         | 0,719         | 0,687         | 0,649         | <b>0,825</b>  |
|                   | Adjusted p-value                    | 0,079         | 0,133         | 0,252         | 0,107         | 0,132         | 0,163         | <b>0,043</b>  |
| hsa_miR_649       | Pearson correlation coefficient (r) | <b>-0,819</b> | <b>0,887</b>  | <b>0,837</b>  | 0,687         | 0,617         | 0,589         | <b>0,851</b>  |
|                   | Adjusted p-value                    | <b>0,046</b>  | <b>0,019</b>  | <b>0,038</b>  | 0,132         | 0,192         | 0,219         | <b>0,032</b>  |
| hsa_miR_20b#      | Pearson correlation coefficient (r) | 0,865         | <b>-0,989</b> | <b>-0,879</b> | -0,478        | -0,414        | -0,438        | -0,731        |
|                   | Adjusted p-value                    | 0,058         | <b>0,001</b>  | <b>0,049</b>  | 0,415         | 0,488         | 0,461         | 0,160         |
| hsa_miR_767_5p    | Pearson correlation coefficient (r) | -0,455        | 0,762         | 0,656         | 0,519         | 0,432         | 0,495         | 0,548         |
|                   | Adjusted p-value                    | 0,364         | 0,078         | 0,157         | 0,292         | 0,393         | 0,318         | 0,260         |
| hsa_miR_548b_3p   | Pearson correlation coefficient (r) | -0,583        | 0,537         | 0,738         | 0,723         | 0,847         | 0,799         | 0,750         |
|                   | Adjusted p-value                    | 0,225         | 0,272         | 0,094         | 0,105         | 0,033         | 0,057         | 0,086         |
| hsa_miR_675b      | Pearson correlation coefficient (r) | 0,492         | -0,409        | -0,279        | -0,127        | -0,098        | -0,065        | -0,329        |
|                   | Adjusted p-value                    | 0,262         | 0,362         | 0,544         | 0,786         | 0,835         | 0,890         | 0,471         |
| hsa_miR_338_5p    | Pearson correlation coefficient (r) | <b>-0,846</b> | 0,647         | 0,425         | 0,188         | 0,108         | 0,078         | 0,405         |
|                   | Adjusted p-value                    | <b>0,034</b>  | 0,165         | 0,401         | 0,721         | 0,838         | 0,883         | 0,426         |
| hsa_miRPlus_C1089 | Pearson correlation coefficient (r) | 0,396         | -0,412        | <b>-0,743</b> | -0,320        | -0,381        | -0,371        | -0,484        |
|                   | Adjusted p-value                    | 0,292         | 0,271         | <b>0,022</b>  | 0,401         | 0,311         | 0,326         | 0,187         |
| hsa_miRPlus_D1033 | Pearson correlation coefficient (r) | -0,113        | -0,058        | -0,085        | 0,527         | 0,535         | 0,506         | 0,392         |
|                   | Adjusted p-value                    | 0,773         | 0,881         | 0,827         | 0,144         | 0,137         | 0,165         | 0,296         |
| SNORD38B          | Pearson correlation coefficient (r) | 0,177         | -0,158        | -0,072        | -0,454        | -0,325        | -0,385        | -0,387        |
|                   | Adjusted p-value                    | 0,649         | 0,684         | 0,854         | 0,219         | 0,394         | 0,306         | 0,303         |
| SNORD38B_dup      | Pearson correlation coefficient (r) | -0,051        | -0,073        | -0,034        | -0,291        | -0,175        | -0,230        | -0,254        |
|                   | Adjusted p-value                    | 0,897         | 0,851         | 0,930         | 0,447         | 0,652         | 0,552         | 0,510         |
| SNORD49A          | Pearson correlation coefficient (r) | 0,129         | -0,292        | -0,256        | -0,429        | -0,286        | -0,361        | -0,435        |

|              |                                     |        |        |        |        |        |        |        |
|--------------|-------------------------------------|--------|--------|--------|--------|--------|--------|--------|
|              | Adjusted p-value                    | 0,740  | 0,445  | 0,507  | 0,250  | 0,455  | 0,340  | 0,242  |
| SNORD49A_dup | Pearson correlation coefficient (r) | 0,220  | -0,432 | -0,265 | -0,292 | -0,114 | -0,200 | -0,362 |
|              | Adjusted p-value                    | 0,569  | 0,246  | 0,490  | 0,446  | 0,770  | 0,605  | 0,338  |
| U6           | Pearson correlation coefficient (r) | 0,030  | 0,045  | -0,040 | -0,455 | -0,388 | -0,423 | -0,371 |
|              | Adjusted p-value                    | 0,939  | 0,908  | 0,919  | 0,219  | 0,302  | 0,257  | 0,326  |
| U6_dup       | Pearson correlation coefficient (r) | -0,322 | 0,024  | -0,041 | -0,045 | 0,049  | -0,053 | 0,036  |
|              | Adjusted p-value                    | 0,398  | 0,950  | 0,916  | 0,908  | 0,900  | 0,892  | 0,926  |

**Supplementary Table S3.** List of the 50 stables miRNAs selected to normalize.

| miRNAs                    | CS1<br><i>Cp</i> value | CS2<br><i>Cp</i> value | CS3<br><i>Cp</i> value | SpF-scMF1<br><i>Cp</i> value | SpF-scMF2<br><i>Cp</i> value | SpF-scMF3<br><i>Cp</i> value | SCO1<br><i>Cp</i> value | SCO2<br><i>Cp</i> value | SCO3<br><i>Cp</i> value | mean<br>( <i>Cp</i> value) | SD<br>( <i>Cp</i> value) | CV<br>( <i>Cp</i> value) |
|---------------------------|------------------------|------------------------|------------------------|------------------------------|------------------------------|------------------------------|-------------------------|-------------------------|-------------------------|----------------------------|--------------------------|--------------------------|
| average 50 stables miRNAs | 31,65                  | 31,83                  | 31,68                  | 32,07                        | 31,66                        | 31,86                        | 31,72                   | 31,28                   | 31,38                   | 31,68                      | 0,24                     | 0,0075                   |
| hsa-let-7d*               | 25,08                  | 25,49                  | 25,63                  | 25,03                        | 25,21                        | 25,77                        | 25,21                   | 25,42                   | 25,27                   | 25,34                      | 0,25                     | 0,0099                   |
| hsa-miR-1296              | 31,95                  | 31,60                  | 31,99                  | 32,27                        | 31,65                        | 31,78                        | 32,61                   | 32,27                   | 31,99                   | 32,01                      | 0,33                     | 0,0102                   |
| hsa-miR-149*              | 34,07                  | 33,84                  | 33,96                  | 34,18                        | 33,65                        | 34,91                        | 34,46                   | 34,10                   | 34,11                   | 34,14                      | 0,36                     | 0,0107                   |
| hsa-miR-628-3p            | 34,44                  | 33,90                  | 34,67                  | 34,73                        | 34,93                        | 35,21                        | 34,74                   | 34,75                   | 35,03                   | 34,71                      | 0,38                     | 0,0108                   |
| hsa-miR-340               | 36,03                  | 36,24                  | 36,99                  | 36,87                        | 36,47                        | 35,88                        | 36,89                   | 36,20                   | 36,20                   | 36,42                      | 0,41                     | 0,0111                   |
| hsa-miR-16                | 26,49                  | 26,81                  | 26,20                  | 27,27                        | 26,65                        | 26,49                        | 26,94                   | 26,64                   | 26,60                   | 26,68                      | 0,30                     | 0,0114                   |
| hsa-miR-30e*              | 31,00                  | 31,30                  | 30,87                  | 31,82                        | 31,21                        | 31,71                        | 31,63                   | 30,78                   | 31,15                   | 31,27                      | 0,37                     | 0,0120                   |
| hsa-miR-25                | 31,57                  | 31,57                  | 31,27                  | 32,44                        | 31,60                        | 31,74                        | 31,72                   | 31,06                   | 31,43                   | 31,60                      | 0,38                     | 0,0121                   |
| hsa-miR-1201              | 31,73                  | 32,00                  | 31,65                  | 32,16                        | 31,52                        | 32,66                        | 32,27                   | 31,62                   | 31,59                   | 31,91                      | 0,39                     | 0,0121                   |
| hsa-miR-92b               | 32,62                  | 33,16                  | 32,77                  | 32,74                        | 33,35                        | 33,23                        | 33,29                   | 32,04                   | 32,72                   | 32,88                      | 0,42                     | 0,0128                   |
| hsa-miR-342-3p            | 30,63                  | 30,73                  | 30,44                  | 30,36                        | 30,35                        | 29,99                        | 30,35                   | 29,64                   | 29,67                   | 30,24                      | 0,39                     | 0,0129                   |
| hsa-miR-93                | 29,79                  | 29,81                  | 29,42                  | 30,49                        | 29,93                        | 29,65                        | 30,65                   | 29,94                   | 29,84                   | 29,95                      | 0,39                     | 0,0129                   |
| hsa-miR-188-5p            | 35,02                  | 34,80                  | 34,93                  | 34,30                        | 35,23                        | 34,87                        | 34,53                   | 34,11                   | 33,90                   | 34,63                      | 0,45                     | 0,0130                   |
| hsa-miR-20a               | 27,22                  | 27,67                  | 27,09                  | 27,94                        | 27,10                        | 27,51                        | 27,01                   | 26,97                   | 26,92                   | 27,27                      | 0,36                     | 0,0130                   |
| hsa-miR-132               | 30,84                  | 30,92                  | 30,79                  | 31,42                        | 30,95                        | 30,92                        | 31,05                   | 29,91                   | 30,66                   | 30,83                      | 0,40                     | 0,0131                   |
| hsa-miR-215               | 33,57                  | 34,14                  | 33,82                  | 34,43                        | 34,14                        | 34,16                        | 35,12                   | 34,33                   | 34,68                   | 34,27                      | 0,45                     | 0,0133                   |
| hsa-miR-95                | 34,35                  | 34,62                  | 33,44                  | 34,85                        | 34,00                        | 34,25                        | 33,69                   | 33,75                   | 34,13                   | 34,12                      | 0,45                     | 0,0133                   |
| hsa-miR-605               | 31,32                  | 31,59                  | 30,31                  | 30,91                        | 31,15                        | 30,81                        | 31,02                   | 31,55                   | 31,46                   | 31,13                      | 0,42                     | 0,0134                   |
| hsa-miR-193a-5p           | 36,00                  | 36,05                  | 35,81                  | 36,24                        | 35,95                        | 35,80                        | 35,72                   | 34,79                   | 35,05                   | 35,71                      | 0,48                     | 0,0134                   |
| hsa-miR-301a              | 32,24                  | 32,71                  | 32,61                  | 33,43                        | 32,63                        | 33,02                        | 32,47                   | 31,86                   | 32,54                   | 32,61                      | 0,45                     | 0,0137                   |
| hsa-let-7a-2*             | 35,58                  | 35,57                  | 36,51                  | 35,81                        | 35,12                        | 35,64                        | 34,94                   | 35,21                   | 36,11                   | 35,61                      | 0,49                     | 0,0138                   |
| hsa-miR-30c               | 27,48                  | 27,61                  | 27,45                  | 27,73                        | 27,43                        | 27,59                        | 27,15                   | 26,60                   | 26,84                   | 27,32                      | 0,38                     | 0,0139                   |
| hsa-miR-1248              | 31,66                  | 32,06                  | 32,70                  | 31,94                        | 31,83                        | 31,57                        | 31,98                   | 32,66                   | 31,42                   | 31,98                      | 0,45                     | 0,0140                   |
| hsa-miR-93*               | 33,88                  | 33,75                  | 33,87                  | 34,55                        | 33,74                        | 32,94                        | 33,68                   | 34,47                   | 34,15                   | 33,89                      | 0,48                     | 0,0141                   |
| hsa-miR-550*              | 34,82                  | 34,56                  | 35,46                  | 35,18                        | 35,15                        | 35,58                        | 35,25                   | 35,94                   | 36,12                   | 35,34                      | 0,50                     | 0,0141                   |
| hsa-miR-483-3p            | 34,76                  | 34,89                  | 34,67                  | 34,25                        | 34,96                        | 35,08                        | 34,93                   | 33,77                   | 33,86                   | 34,58                      | 0,49                     | 0,0142                   |
| hsa-miR-378               | 32,24                  | 32,28                  | 32,84                  | 33,01                        | 32,89                        | 32,78                        | 33,07                   | 31,67                   | 32,33                   | 32,57                      | 0,47                     | 0,0143                   |
| hsa-miR-484               | 31,27                  | 31,07                  | 30,61                  | 31,19                        | 31,10                        | 30,94                        | 31,21                   | 29,92                   | 30,54                   | 30,87                      | 0,44                     | 0,0143                   |
| hsa-miR-106b              | 33,76                  | 34,23                  | 33,84                  | 34,96                        | 34,12                        | 33,70                        | 34,21                   | 33,49                   | 33,32                   | 33,96                      | 0,49                     | 0,0144                   |
| hsa-miR-296-5p            | 31,74                  | 31,51                  | 31,85                  | 32,81                        | 31,85                        | 32,15                        | 32,76                   | 32,59                   | 32,12                   | 32,15                      | 0,47                     | 0,0146                   |
| hsa-miR-30e               | 32,96                  | 32,47                  | 32,23                  | 32,75                        | 31,79                        | 32,71                        | 32,26                   | 31,49                   | 32,01                   | 32,30                      | 0,48                     | 0,0149                   |
| hsa-miR-101*              | 35,98                  | 35,62                  | 35,54                  | 35,75                        | 35,74                        | 35,84                        | 35,92                   | 34,48                   | 34,76                   | 35,51                      | 0,53                     | 0,0149                   |

|                |       |       |       |       |       |       |       |       |       |       |      |        |
|----------------|-------|-------|-------|-------|-------|-------|-------|-------|-------|-------|------|--------|
| hsa-miR-150    | 31,36 | 30,79 | 31,09 | 30,66 | 30,49 | 31,13 | 31,05 | 29,79 | 30,86 | 30,80 | 0,46 | 0,0150 |
| hsa-let-7b*    | 31,24 | 31,70 | 31,67 | 31,58 | 31,21 | 31,28 | 30,97 | 30,49 | 30,43 | 31,17 | 0,47 | 0,0151 |
| hsa-miR-18a*   | 32,99 | 33,44 | 33,88 | 33,52 | 33,01 | 34,19 | 33,33 | 34,09 | 32,67 | 33,46 | 0,52 | 0,0155 |
| hsa-miR-335    | 32,10 | 32,66 | 31,58 | 32,71 | 31,79 | 31,91 | 31,69 | 31,70 | 31,17 | 31,92 | 0,50 | 0,0157 |
| hsa-miR-15b    | 28,02 | 28,11 | 27,92 | 28,91 | 28,10 | 29,11 | 28,82 | 28,17 | 28,13 | 28,36 | 0,45 | 0,0158 |
| hsa-miR-191    | 30,02 | 30,29 | 30,09 | 30,92 | 30,07 | 30,52 | 29,73 | 29,59 | 29,34 | 30,06 | 0,48 | 0,0160 |
| hsa-miR-501-5p | 32,12 | 32,80 | 32,28 | 31,94 | 32,55 | 32,28 | 31,31 | 31,80 | 31,29 | 32,04 | 0,51 | 0,0160 |
| hsa-miR-425    | 31,28 | 31,77 | 31,47 | 32,52 | 31,43 | 31,13 | 31,20 | 31,00 | 30,80 | 31,40 | 0,51 | 0,0161 |
| hsa-miR-191    | 30,15 | 30,44 | 30,21 | 30,98 | 29,94 | 30,55 | 29,82 | 29,46 | 29,53 | 30,12 | 0,49 | 0,0163 |
| hsa-miR-126*   | 31,31 | 30,90 | 30,32 | 31,17 | 30,80 | 30,93 | 31,24 | 29,70 | 30,60 | 30,77 | 0,51 | 0,0166 |
| hsa-miR-106a   | 28,13 | 28,72 | 28,19 | 28,82 | 28,02 | 28,70 | 27,75 | 27,63 | 27,66 | 28,18 | 0,47 | 0,0167 |
| hsa-miR-590-5p | 31,73 | 33,18 | 32,49 | 32,79 | 32,69 | 32,61 | 32,87 | 31,67 | 31,77 | 32,42 | 0,56 | 0,0172 |
| hsa-miR-210    | 31,71 | 31,73 | 31,86 | 31,50 | 31,09 | 31,52 | 30,61 | 30,55 | 30,56 | 31,24 | 0,54 | 0,0173 |
| hsa-miR-152    | 30,10 | 30,20 | 29,65 | 30,86 | 30,08 | 30,13 | 29,98 | 29,03 | 29,43 | 29,94 | 0,52 | 0,0174 |
| hsa-miR-190    | 32,86 | 32,72 | 32,90 | 33,69 | 32,84 | 33,28 | 32,33 | 31,90 | 32,00 | 32,72 | 0,58 | 0,0176 |
| hsa-miR-20a*   | 33,10 | 33,45 | 32,90 | 33,24 | 32,54 | 32,98 | 32,03 | 32,14 | 31,84 | 32,69 | 0,58 | 0,0176 |
| hsa-miR-1974   | 21,12 | 22,17 | 21,70 | 22,00 | 21,56 | 22,19 | 21,48 | 21,27 | 21,49 | 21,66 | 0,38 | 0,0177 |
| hsa-miR-30d    | 31,22 | 31,93 | 31,71 | 31,79 | 31,48 | 31,53 | 31,04 | 30,21 | 30,76 | 31,30 | 0,55 | 0,0177 |

---

**Supplemental Table S4.** List of selected miRNAs analysed by RT-qPCR

| <b>miRNA</b>   | <b>miRBase v18</b> | <b>Sequence</b>         | <b>Assay no.</b> | <b>Sample type</b> |
|----------------|--------------------|-------------------------|------------------|--------------------|
| hsa-miR-34c    | hsa-miR-34c-5p     | AGGCAGUGUAGUUAGCUGAUUGC | 204407; 205659   | Sperm; Testis      |
| hsa-miR-320a   | hsa-miR-320a       | AAAAGCUGGGUUGAGAGGGCGA  | 204154           | Sperm              |
| hsa-let-7b     | hsa-let-7b-5p      | UGAGGUAGUAGGUUGUGUGGUU  | 204750           | Sperm              |
| hsa-miR-22     | hsa-miR-22-3p      | AAGCUGCCAGUUGAAGAACUGU  | 204606           | Sperm              |
| hsa-miR-122    | hsa-miR-122-5p     | UGGAGUGUGACAAUGGUGUUUG  | 204090; 205664   | Sperm; Testis      |
| hsa-miR-423    | hsa-miR-423-3p     | AGCUCGGUCUGAGGCCCCUCAGU | 204488           | Sperm              |
|                | hsa-miR-423-5p     | UGAGGGGCAGAGAGCGAGACUUU | 204593           | Sperm              |
| hsa-miR-375    | hsa-miR-375        | UUUGUUCGUUCGGCUCGCGUGA  | 204362           | Sperm              |
| hsa-let-7c     | hsa-let-7c-5p      | UGAGGUAGUAGGUUGUAUGGUU  | 204444           | Sperm              |
| hsa-miR-140    | hsa-miR-140-3p     | UACCACAGGGUAGAACCACGG   | 204304           | Sperm              |
| hsa-miR-21     | hsa-miR-21-5p      | UAGCUUAUCAGACUGAUGUUGA  | 204230           | Sperm              |
| hsa-miR-152    | hsa-miR-152-3p     | UCAGUGCAUGACAGAACUUGG   | 204294           | Sperm              |
| hsa-miR-30a    | hsa-miR-30a-5p     | UGUAAACAUCUCGACUGGAAG   | 204039           | Sperm              |
| hsa-miR-148a   | hsa-miR-148a-3p    | UCAGUGCACUACAGAACUUUGU  | 204121           | Sperm              |
| hsa-let-7g     | hsa-let-7g-5p      | UGAGGUAGUAGUUUGUACAGUU  | 204565           | Sperm              |
| hsa-miR-192    | hsa-miR-192-5p     | CUGACCUAUGAAUUGACAGCC   | 204099           | Sperm              |
| hsa-miR-10a    | hsa-miR-10a-5p     | UACCCUGUAGAUCCGAAUUUGUG | 204600           | Sperm              |
| hsa-miR-335    | hsa-miR-335-5p     | UCAAGAGCAAUAACGAAAAAUGU | 204151           | Sperm              |
| hsa-miR-191    | hsa-miR-191-5p     | CAACGGAAUCCCAAAGCAGCUG  | 204306           | Sperm              |
| hsa-miR-25     | hsa-miR-25-3p      | CAUUGCACUUGUCUCGGUCUGA  | 204361           | Sperm              |
| hsa-miR-34b    | hsa-miR-34b-3p     | CAAUCACUAACUCCACUGCCAU  | 204005           | Sperm              |
| hsa-miR-221    | hsa-miR-221-3p     | AGCUACAUUGUCUGCGGGUUUC  | 204532           | Sperm              |
| hsa-miR-449a   | hsa-miR-449a       | UGGCAGUGUAUUGUUAGCUGGU  | 204481           | Sperm; Testis      |
| hsa-miR-30e-3p | hsa-miR-30e-3p     | CUUUCAGUCGGAUGUUUACAGC  | 204410           | Testis             |
